# Supplementary material for: Synthesis of polyhydroquinolines and propargylamines through one-pot multicomponent reactions using an acidic ionic liquid immobilized onto magnetic Fe3O4 as an efficient heterogeneous catalyst under solvent-free sonication
Source: Royal Society of Chemistry journal article supplement (doi:10.1039/d0ra04008h), 2020-01-01
Supplement: d0ra04008h1.pdf [file d0ra04008h1.pdf]

## Supporting information

### **Synthesis of polyhydroquinolines and propargylamines through one-pot multicomponent reactions using an acidic ionic liquid-immobilized onto magnetic Fe<sub>3</sub>O<sub>4</sub> as an efficient heterogeneous catalyst under solvent-free sonication**

Hai Truong Nguyen, Vy Anh Truong, and Phuong Hoang Tran\*

Department of Organic Chemistry, Faculty of Chemistry, University of Science, Ho Chi Minh City, 721337, Vietnam

Vietnam National University – Ho Chi Minh City, 721337, Vietnam

Email: thphuong@hcmus.edu.vn

\*Corresponding author: thphuong@hcmus.edu.vn

#### Table of contents

|                                                                            |                |
|----------------------------------------------------------------------------|----------------|
| <b>Section S1. Chemicals, supplies, and instruments</b>                    | <b>S1-S2</b>   |
| <b>Section S2. Synthesis and Characterization of LAIL@NMP</b>              | <b>S2-S6</b>   |
| <b>Section S3. Optimization of the reaction condition</b>                  | <b>S6-S9</b>   |
| <b>Section S4. Spectral data</b>                                           | <b>S10-S23</b> |
| <b>Section S5. <sup>1</sup>H, <sup>13</sup>C NMR and HRMS spectroscopy</b> | <b>S24-S56</b> |
| <b>Section S6. References</b>                                              | <b>S57-S58</b> |

## Section S1. Chemicals, supplies, and instruments

### Chemicals and supplies

Imidazole (grade ReagentPlus®, assay 99%), tetraethyl orthosilicate (assay  $\geq 99.5\%$  (GC)), cyclohexanecarboxaldehyde (assay 97%), 2-chlorobenzaldehyde (assay 99%), 4-chlorobenzaldehyde (assay 97%), 4-fluorobenzaldehyde (assay 98%), 4-*tert*-butylbenzaldehyde (assay 97%), 2-hydroxy-5-nitrobenzaldehyde (assay 98%), 2-carboxybenzaldehyde (assay 97%), 4-(dimethylamino)benzaldehyde (grade ACS reagent, assay 99%), benzo[*d*][1,3]dioxole-5-carbaldehyde (piperonal, assay 99%), furfural (assay 99%), 5-bromo-2-furaldehyde (assay 97%), 5-chloro-2-furaldehyde (assay 98%), 5-(4-chlorophenyl)furfural (assay 95%), 2-benzofurancarboxaldehyde (assay 97%), ethyl acetoacetate (grade ReagentPlus®, assay 99%), piperidine (grade ReagentPlus®, assay 99%), (3-chloropropyl)trimethoxysilane (assay 97%) were obtained from Sigma-Aldrich. 5,5-Dimethyl-1,3-cyclohexanedione (dimedone) (99%) was obtained from Across. Iron(III) chloride hexahydrate ( $\text{FeCl}_3 \cdot 6\text{H}_2\text{O}$ ) (for analysis EMSURE® ACS, Reag. Ph Eur), Iron(II) chloride tetrahydrate ( $\text{FeCl}_2 \cdot 4\text{H}_2\text{O}$ ) (for analysis EMSURE® ACS, Reag. Ph Eur), Potassium hydroxide (KOH) (pellets for analysis EMSURE®), ethanol (absolute for analysis EMSURE® ACS, ISO, Reag. Ph Eur), zinc chloride ( $\text{ZnCl}_2$ ) (for analysis EMSURE® ACS, ISO, Reag. Ph Eur), benzaldehyde (for synthesis), 4-methylbenzaldehyde (for synthesis), 4-methoxybenzaldehyde (for synthesis), 5-hydroxymethyl-2-furancarboxaldehyde (5-(hydroxymethyl)furfural) (for synthesis), ammonium acetate (EMPLURA®), phenylacetylene (for synthesis), TLC (silica gel 60 F<sub>254</sub>), and silica gel 230–400 mesh (for column chromatography) were obtained from Merck. Ethyl acetate (purity  $\geq 99.5\%$ ), *n*-hexane (purity  $\geq 99.5\%$ ), and chloroform (purity  $\geq 99\%$ ) were obtained from Xilong Chemical Co., Ltd (China).

### Analytical techniques

The <sup>1</sup>H and <sup>13</sup>C NMR spectra were recorded on a Bruker Advance 500 instruments using CDCl<sub>3</sub> as solvent and solvent peaks or TMS as internal standards. HRMS (ESI) data were collected using Bruker micrOTOF-QII MS at 80 eV. FT-IR spectra were recorded in the form of KBr pellets by a Bruker Vertex 70. GC-MS analyses were performed on an Agilent GC system 7890 equipped with a mass selective

detector Agilent 5973N and a capillary DB-5MS column (30m x 250  $\mu\text{m}$  x 0.25  $\mu\text{m}$ ). Thermal gravimetric analysis (TGA) was obtained using a TA Q500 thermal analysis system with the sample held in a platinum pan in a continuous airflow. Ultrasonic irradiation-assisted reactions were performed on an Elma sonic S30H at the frequency of 37 kHz. Raman spectra were recorded on a Horiba Xplora One using a 532 nm argon ion laser. ICP-MS was recorded on a PerkinElmer 350X. Scanning electron microscope (SEM) was performed on an S4800 Hitachi, Japan. The electron diffraction spectroscopy (EDS) was conducted on a Horiba H7593. ICP-OES was recorded on a PerkinElmer 350X.

## **Section S2. Synthesis and Characterization of LAIL@NMP**

### **General procedure of magnetic Fe<sub>3</sub>O<sub>4</sub> nanoparticles (MNPs)<sup>1</sup>**

A co-precipitation method was used for the preparation of nano-Fe<sub>3</sub>O<sub>4</sub>. In a typical procedure FeCl<sub>3</sub>·6H<sub>2</sub>O (20 mmol) and FeSO<sub>4</sub>·7H<sub>2</sub>O (10 mmol) were dissolved in 100 mL deionized water. The mixture was stirred at 80 °C and then KOH (12 mmol) was added and stirred continuously within 2 h. The black precipitate, after being collected by a permanent magnet, was washed with water (3 x 100 mL) and ethanol (3 x 50 mL). This MNP material was dried at 60–70 °C under vacuum for 1 h

### **General procedure for the synthesis of LAIL@MNP<sup>1</sup>**

A mixture of 3-chloroethoxypropylsilane (5.0 mmol, 1.2 mL) and imidazole (5.0 mmol, 0.34 g) was stirred at reflux for 17 h. The yellowish viscous liquid was diluted in 50 mL of ethanol-waterer (1:1 volume ratio) solution, and the mixture was sonicated at 40 °C for 4 h. The LAIL@MNP was washed with dichloromethane and dried at 70 °C *in vacuo*. A mixture of LAIL@MNP (1.0 g) and ZnCl<sub>2</sub> (1.0 mmol) in ethanol (50 mL) was refluxed for 24 h. After completion, the catalyst was separated by a magnet, washed with ethanol, and dried at 100 °C for 5 h.

# Characterization of LAIL@MNP

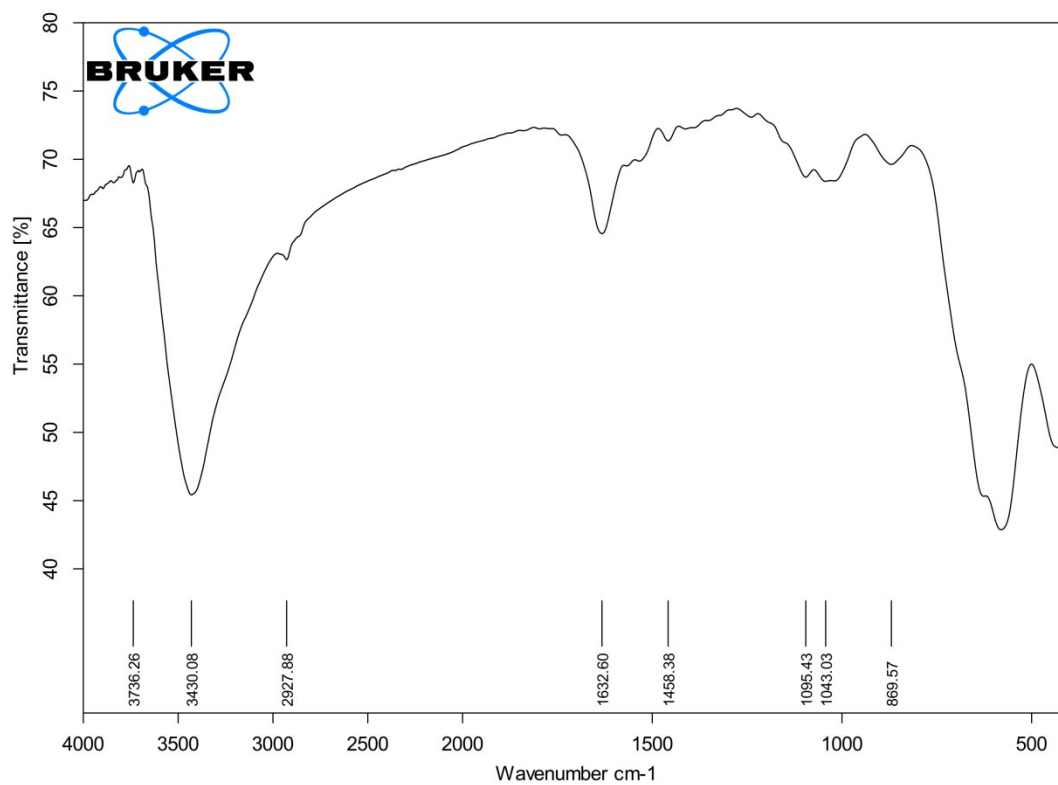

Figure S1. FT-IR spectra of LAIL@MNP

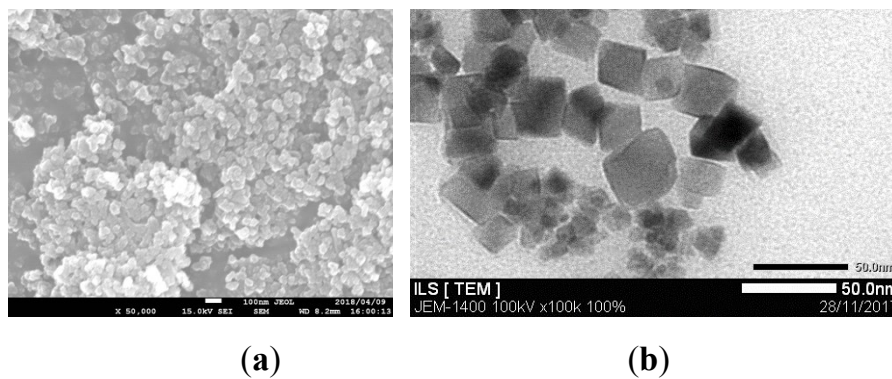

Figure S2. SEM image of LAIL@MNP (a) and TEM images of as-prepared (b)

Sample: Fe3O4@SiO2\_IL  
Size: 10.9120 mg  
Method: Ramp

TGA

File: C:\TA\Data\TGA\Tan\Fe3O4@SiO2\_IL.001

Run Date: 13-Oct-2017 09:32

Instrument: TGA Q500 V20.13 Build 39

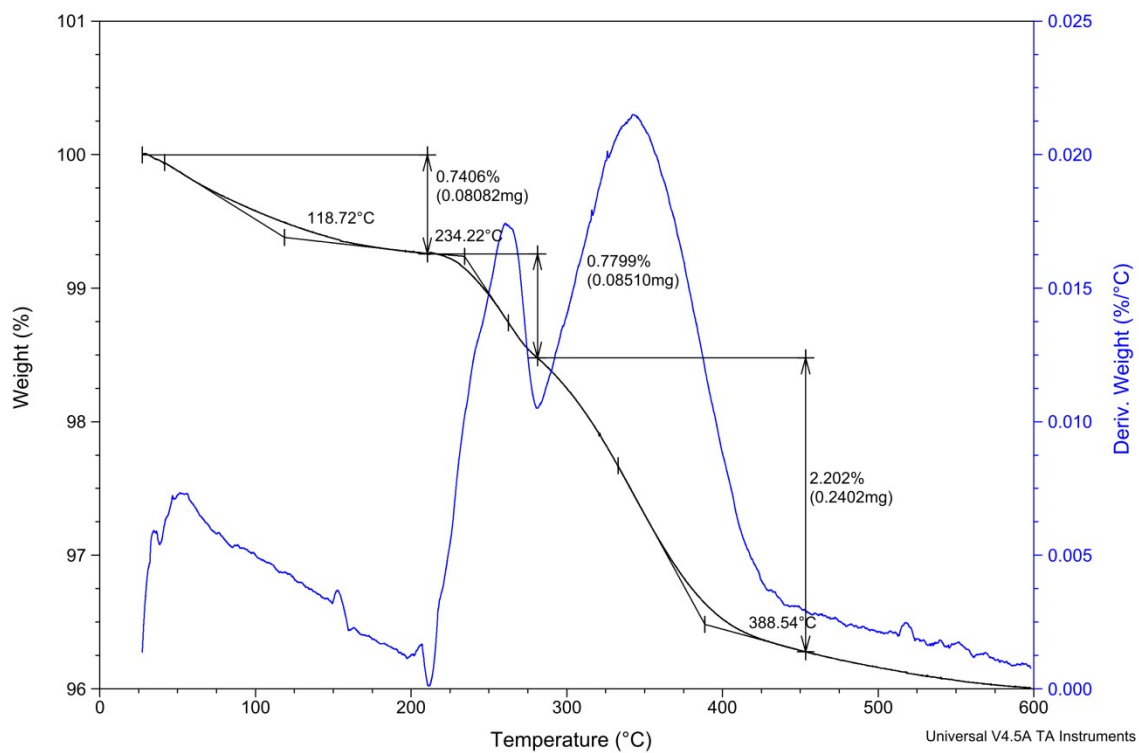

**Figure S3.** TGA curve of LAIL@MNP

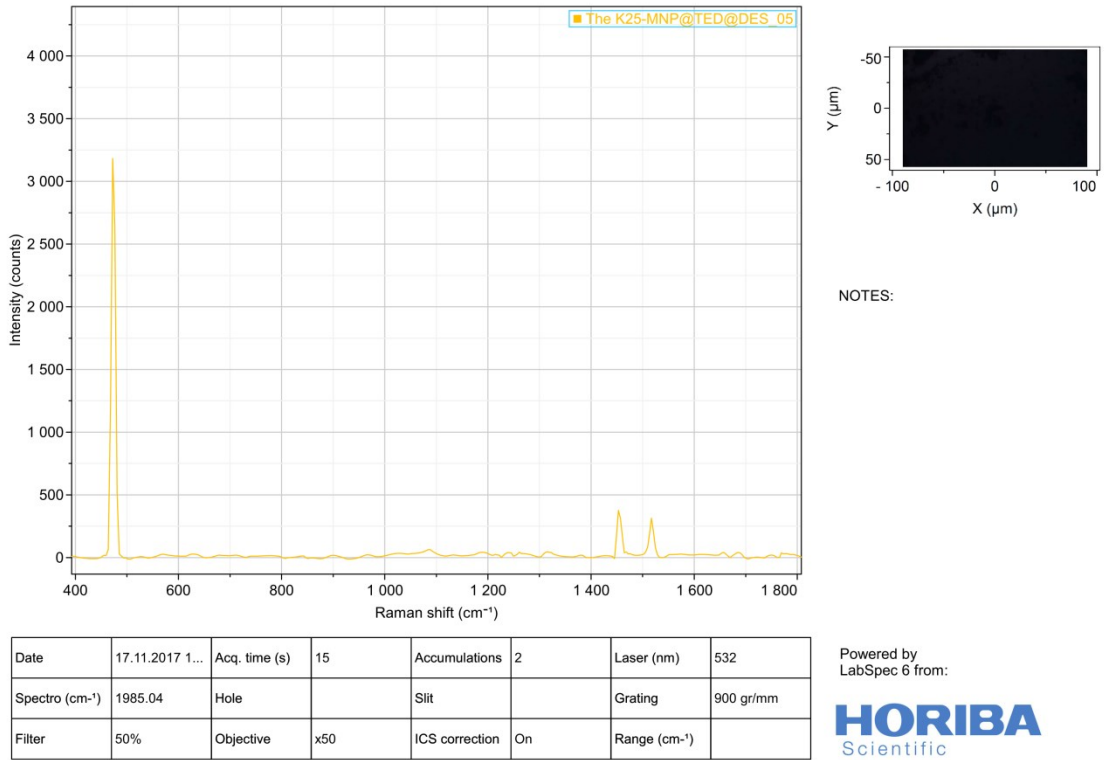

17.11.2017 14:55

1/1

**Figure S4.** Raman spectrum of LAIL@MNP

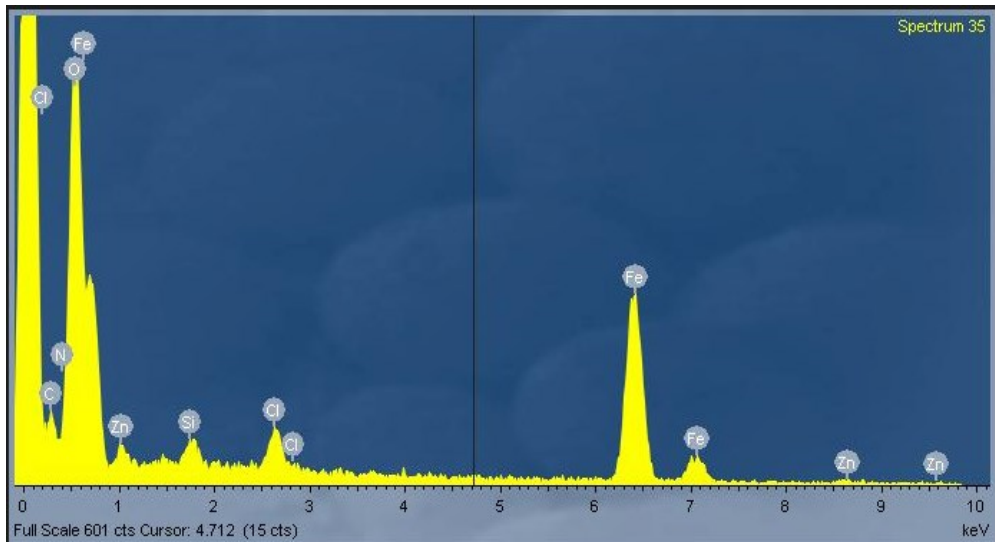

**Figure S5.** EDS spectrum of LAIL@MNP

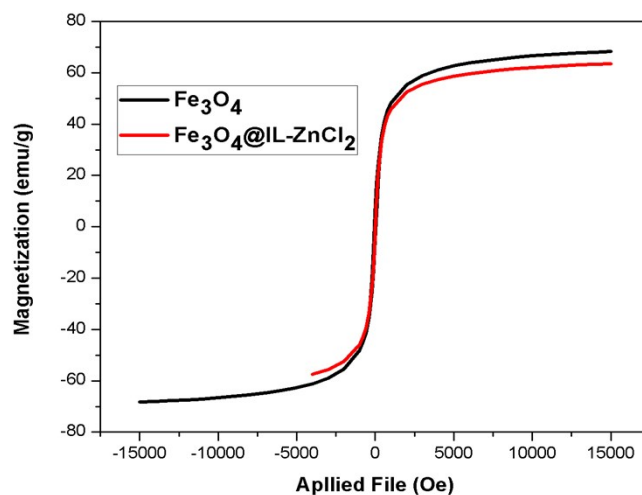

**Figure S6.** VSM curves for LAIL@MNP

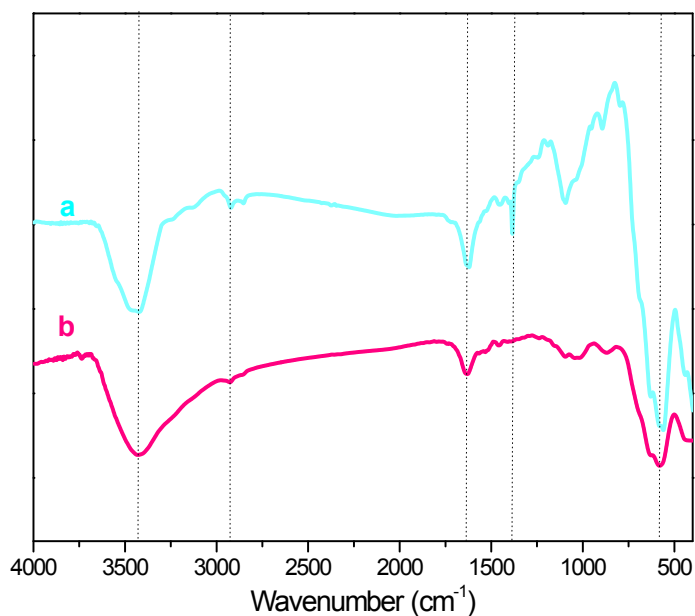

**Figure S7.** FT-IR spectra of fresh LAIL@MNP (a, blue), and LAIL@MNP after the fifth recovery (b, pink).

### Section S3. Optimazation of the reaction condition

**Table S1.** Optimazation of reaction conditions<sup>a</sup>

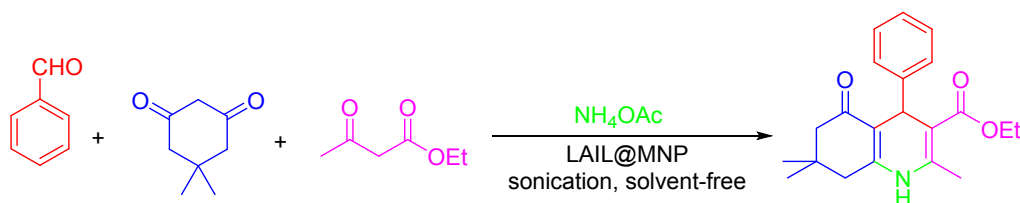

| Entry    | Temperature (°C) | Time (min) | Catalyst loading (mg) | Ratio of a:b:c:d <sup>b</sup> (mmol) | Isolated yield (%) |
|----------|------------------|------------|-----------------------|--------------------------------------|--------------------|
| 1        | 30               | 10         | 15                    | 1:1:1:2                              | 37                 |
| 2        | 30               | 20         | 15                    | 1:1:1:2                              | 49                 |
| 3        | 30               | 30         | 15                    | 1:1:1:2                              | 55                 |
| 4        | 30               | 45         | 15                    | 1:1:1:2                              | 63                 |
| 5        | 30               | 60         | 15                    | 1:1:1:2                              | 68                 |
| 6        | 80               | 10         | 15                    | 1:1:1:2                              | 65                 |
| 7        | 80               | 20         | 15                    | 1:1:1:2                              | 77                 |
| 8        | 80               | 30         | 15                    | 1:1:1:2                              | 84                 |
| <b>9</b> | <b>80</b>        | <b>45</b>  | <b>15</b>             | <b>1:1:1:2</b>                       | <b>97</b>          |
| 10       | 80               | 60         | 15                    | 1:1:1:2                              | 98                 |
| 11       | 80               | 45         | 15                    | 1:1:1:1                              | 75                 |
| 12       | 80               | 45         | 15                    | 1:1.2:1:1                            | 84                 |
| 13       | 80               | 45         | 15                    | 1:1.5:1.1                            | 78                 |
| 14       | 80               | 45         | 15                    | 1:2:1:1                              | 74                 |
| 15       | 80               | 45         | 15                    | 1:1:1.2:1                            | 88                 |
| 16       | 80               | 45         | 15                    | 1:1:1:1.5                            | 81                 |
| 17       | 80               | 45         | 0                     | 1:1:1:2                              | 34                 |
| 18       | 80               | 45         | 1                     | 1:1:1:2                              | 45                 |
| 19       | 80               | 45         | 5                     | 1:1:1:2                              | 63                 |
| 20       | 80               | 45         | 10                    | 1:1:1:2                              | 77                 |
| 21       | 80               | 45         | 20                    | 1:1:1:2                              | 97                 |

<sup>a</sup> Under ultrasonic

<sup>b</sup> Benzaldehyde (a), dimedone (b), ethyl acetoacetate (c) and ammonium acetate (d)

**Table S2.** Effect of catalysts and solvents

| Entry | Catalyst              | Solvent      | Conversion <sup>a</sup> (%) |
|-------|-----------------------|--------------|-----------------------------|
| 1     | [BMIM]PF <sub>6</sub> | Solvent-free | 61                          |
| 2     | [EMIM]Cl              | Solvent-free | 58                          |
| 3     | AlCl <sub>3</sub>     | Solvent-free | 97                          |



| Entry     | Catalyst                         | Solvent             | Conversion <sup>a</sup> (%) |
|-----------|----------------------------------|---------------------|-----------------------------|
| 4         | FeCl <sub>3</sub>                | Solvent-free        | 96                          |
| 5         | Al <sub>2</sub> O <sub>3</sub>   | Solvent-free        | 51                          |
| 6         | Fe <sub>2</sub> O <sub>3</sub>   | Solvent-free        | 45                          |
| 7         | CuFe <sub>2</sub> O <sub>4</sub> | Solvent-free        | 44                          |
| 8         | ZnFe <sub>2</sub> O <sub>4</sub> | Solvent-free        | 40                          |
| 9         | γ-Fe <sub>2</sub> O <sub>3</sub> | Solvent-free        | 42                          |
| 10        | Fe <sub>3</sub> O <sub>4</sub>   | Solvent-free        | 45                          |
| 11        | LAIL                             | Solvent-free        | 56                          |
| 12        | ZnCl <sub>2</sub>                | Solvent-free        | 95                          |
| 13        | None-catalyst                    | Solvent-free        | 34                          |
| <b>14</b> | <b>LAIL@NMP</b>                  | <b>Solvent-free</b> | <b>97</b>                   |
| 15        | LAIL@NMP                         | Ethanol             | 72                          |
| 16        | LAIL@NMP                         | Acetone             | 47                          |
| 17        | LAIL@NMP                         | Acetonitrile        | 41                          |
| 18        | LAIL@NMP                         | <i>n</i> -Hexane    | 79                          |

<sup>a</sup>: Isolated yields

**Table S3.** Optimization of reaction conditions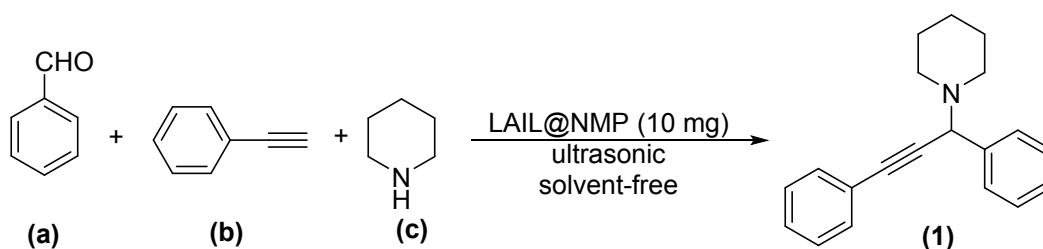

| Entry     | Temperature (°C) | Time (min) | Catalyst loading (mg) | Ratio of a:b:c (mmol) | Conversion <sup>a</sup> (%) |
|-----------|------------------|------------|-----------------------|-----------------------|-----------------------------|
| 1         | 30               | 1          | 10                    | 1:1.5:1.2             | 30                          |
| 2         | 30               | 5          | 10                    | 1:1.5:1.2             | 37                          |
| 3         | 30               | 10         | 10                    | 1:1.5:1.2             | 44                          |
| 4         | 30               | 15         | 10                    | 1:1.5:1.2             | 48                          |
| 5         | 30               | 20         | 10                    | 1:1.5:1.2             | 59                          |
| 6         | 30               | 25         | 10                    | 1:1.5:1.2             | 60                          |
| 7         | 30               | 30         | 10                    | 1:1.5:1.2             | 65                          |
| 8         | 30               | 45         | 10                    | 1:1.5:1.2             | 72                          |
| 9         | 30               | 60         | 10                    | 1:1.5:1.2             | 78                          |
| 10        | 30               | 90         | 10                    | 1:1.5:1.2             | 80                          |
| 11        | 30               | 120        | 10                    | 1:1.5:1.2             | 83                          |
| 12        | 80               | 1          | 10                    | 1:1.5:1.2             | 49                          |
| 13        | 80               | 5          | 10                    | 1:1.5:1.2             | 54                          |
| 14        | 80               | 10         | 10                    | 1:1.5:1.2             | 61                          |
| 15        | 80               | 15         | 10                    | 1:1.5:1.2             | 65                          |
| 16        | 80               | 20         | 10                    | 1:1.5:1.2             | 73                          |
| 17        | 80               | 25         | 10                    | 1:1.5:1.2             | 77                          |
| 18        | 80               | 30         | 10                    | 1:1.5:1.2             | 86                          |
| <b>19</b> | <b>80</b>        | <b>45</b>  | <b>10</b>             | <b>1:1.5:1.2</b>      | <b>95</b>                   |
| 20        | 80               | 60         | 10                    | 1:1.5:1.2             | 96                          |
| 21        | 80               | 90         | 10                    | 1:1.5:1.2             | 95                          |
| 22        | 80               | 120        | 10                    | 1:1.5:1.2             | 97                          |
| 23        | 80               | 45         | 0                     | 1:1.5:1.2             | 60                          |
| 24        | 80               | 45         | 1                     | 1:1.5:1.2             | 73                          |

| Entry | Temperature (°C) | Time (min) | Catalyst loading (mg) | Ratio of a:b:c (mmol) | Conversion <sup>a</sup> (%) |
|-------|------------------|------------|-----------------------|-----------------------|-----------------------------|
| 25    | 80               | 45         | 5                     | 1:1.5:1.2             | 81                          |
| 26    | 80               | 45         | 15                    | 1:1.5:1.2             | 100                         |
| 27    | 80               | 45         | 20                    | 1:1.5:1.2             | 100                         |
| 28    | 80               | 45         | 10                    | 1:1:1                 | 49                          |
| 29    | 80               | 45         | 10                    | 1:1.1:1               | 53                          |
| 30    | 80               | 45         | 10                    | 1:1.2:1               | 55                          |
| 31    | 80               | 45         | 10                    | 1:1.3:1               | 55                          |
| 32    | 80               | 45         | 10                    | 1:1.4:1               | 59                          |
| 33    | 80               | 45         | 10                    | 1:1.5:1               | 62                          |
| 34    | 80               | 45         | 10                    | 1:2:1                 | 70                          |
| 35    | 80               | 45         | 10                    | 1:1.5:1.1             | 86                          |

<sup>a</sup> Conversion was reported by GC-MS

**Table S4.** Effect of catalysts and solvents

| Entry | Catalyst                         | Solvent      | Conversion <sup>a</sup> (%) |
|-------|----------------------------------|--------------|-----------------------------|
| 1     | [BMIM]PF <sub>6</sub>            | Solvent-free | 85                          |
| 2     | [EMIM]Cl                         | Solvent-free | 81                          |
| 3     | [ButMIm]OTf                      | Solvent-free | 88                          |
| 4     | AlCl <sub>3</sub>                | Solvent-free | 95                          |
| 5     | FeCl <sub>3</sub>                | Solvent-free | 96                          |
| 6     | CuCl <sub>2</sub>                | Solvent-free | 95                          |
| 7     | HfCl <sub>4</sub>                | Solvent-free | 93                          |
| 8     | Al <sub>2</sub> O <sub>3</sub>   | Solvent-free | 80                          |
| 9     | Fe <sub>2</sub> O <sub>3</sub>   | Solvent-free | 77                          |
| 10    | MgO                              | Solvent-free | 70                          |
| 11    | CuO                              | Solvent-free | 71                          |
| 12    | Cu <sub>2</sub> O                | Solvent-free | 72                          |
| 13    | ZnO                              | Solvent-free | 75                          |
| 14    | CuFe <sub>2</sub> O <sub>4</sub> | Solvent-free | 83                          |

| Entry     | Catalyst                         | Solvent                       | Conversion <sup>a</sup> (%) |
|-----------|----------------------------------|-------------------------------|-----------------------------|
| 15        | ZnFe <sub>2</sub> O <sub>4</sub> | Solvent-free                  | 81                          |
| 16        | γ-Fe <sub>2</sub> O <sub>3</sub> | Solvent-free                  | 85                          |
| 17        | Fe <sub>3</sub> O <sub>4</sub>   | Solvent-free                  | 82                          |
| 18        | LAIL                             | Solvent-free                  | 79                          |
| 19        | ZnCl <sub>2</sub>                | Solvent-free                  | 94                          |
| 20        | None-catalyst                    | Solvent-free                  | 47                          |
| <b>21</b> | <b>LAIL@NMP</b>                  | <b>Solvent-free</b>           | <b>95</b>                   |
| 22        | LAIL@NMP                         | Dichloromethane               | 52                          |
| 23        | LAIL@NMP                         | Tetrahydrofuran               | 59                          |
| 24        | LAIL@NMP                         | 2-Butanol                     | 47                          |
| 25        | LAIL@NMP                         | Ethanol                       | 55                          |
| 26        | LAIL@NMP                         | 2-Propanol                    | 53                          |
| 27        | LAIL@NMP                         | Acetone                       | 46                          |
| 28        | LAIL@NMP                         | <i>N,N</i> -Dimethylformamide | 50                          |
| 29        | LAIL@NMP                         | Acetonitrile                  | 63                          |
| 30        | LAIL@NMP                         | Dimethyl sulfoxide            | 74                          |
| 31        | LAIL@NMP                         | Ethyl acetate                 | 71                          |
| 32        | LAIL@NMP                         | Cyclopentyl methyl ether      | 69                          |
| 33        | LAIL@NMP                         | <i>n</i> -Hexane              | 70                          |
| 34        | LAIL@NMP                         | Toluene                       | 78                          |
| 35        | LAIL@NMP                         | 1,4-Dioxane                   | 82                          |
| 36        | LAIL@NMP                         | Chloroform                    | 69                          |

<sup>a</sup> Conversion was reported by GC-MS

## Section S4. Spectral data.

### Ethyl 4-cyclohexyl-2,7,7-trimethyl-5-oxo-1,4,5,6,7,8-hexahydro-quinolin-3-carboxylate<sup>2-4</sup> (1)

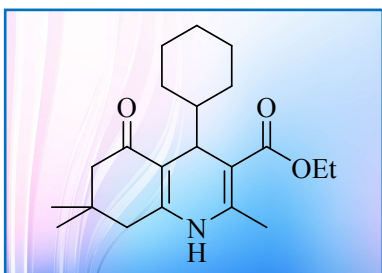

White solid, mp = 175 – 178 °C

**IR (KBr, cm<sup>-1</sup>):** 3282, 2959, 1698, 1487, 1215.

**<sup>1</sup>H NMR** (500 MHz, CDCl<sub>3</sub>)  $\delta_{\text{H}}$  5.78 (br, 1H), 4.21–4.10 (m, 2H), 4.00–3.99 (d,  $J$  = 4.5 Hz, 1H), 2.31 (s, 3H), 2.31–2.25 (m, 4H), 1.63–1.55 (m, 8H), 1.30–1.27 (t,  $J$  = 7.0 Hz, 14.0 Hz, 3H), 1.12 (s, 3H), 1.09 (s, 3H), 0.93–0.87 (m, 2H).

**<sup>13</sup>C NMR** (125 MHz, CDCl<sub>3</sub>)  $\delta_{\text{C}}$  197.1, 165.7, 164.6, 164.2, 137.3, 125.0, 124.7, 61.5, 51.9, 46.3, 32.9, 29.7, 28.3, 25.0, 14.3.

### Ethyl 2,7,7-trimethyl-5-oxo-4-phenyl-1,4,5,6,7,8-hexahydroquinolin-3-carboxylate<sup>5-7</sup> (2)

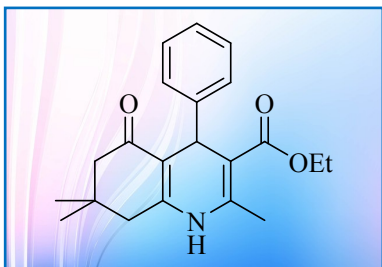

Pale yellow solid, mp = 201 – 203 °C

**IR (KBr, cm<sup>-1</sup>):** 3285, 3082, 2954, 1697, 1609

**<sup>1</sup>H NMR** (500 MHz, CDCl<sub>3</sub>)  $\delta_{\text{H}}$  7.30–7.29 (d,  $J$  = 7.5 Hz, 2H), 7.20–7.17 (t,  $J$  = 7.5 Hz, 2H), 7.10 – 7.07 (t,  $J$  = 7.5 Hz, 1H), 6.08 (s, 1H), 5.05 (s, 1H), 4.07–4.03 (m, 2H), 2.36 (s, 3H), 2.33–2.30 (m, 1H), 2.24–2.16 (m, 3H), 1.20–1.17 (t,  $J$  = 7.0 Hz, 14.0 Hz, 3H), 1.07 (s, 3H), 0.93 (s, 3H).

**<sup>13</sup>C NMR** (125 MHz, CDCl<sub>3</sub>)  $\delta_{\text{C}}$  195.5, 167.5, 148.3, 147.0, 143.5, 128.0, 127.9, 126.0, 112.2, 106.1, 59.8, 50.8, 41.1, 36.6, 32.7, 29.4, 27.2, 19.3, 14.2.

**Ethyl 4-(2-chlorophenyl)-2,7,7-trimethyl-5-oxo-1,4,5,6,7,8-hexahydroquinolin-3-carboxylate<sup>5, 8</sup> (3)**

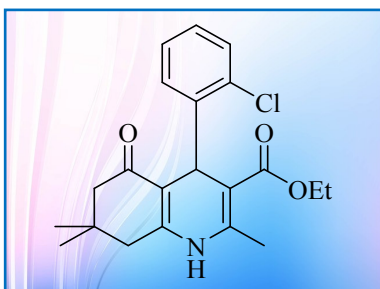

White solid, mp = 209 – 211 °C

**<sup>1</sup>H NMR** (500 MHz, CDCl<sub>3</sub>)  $\delta_{\text{H}}$  7.39–7.38 (d,  $J$  = 8.0 Hz, 1H), 7.24–7.22 (d,  $J$  = 8.0 Hz, 1H), 7.13–7.10 (m, 1H), 7.03–7.00 (m, 1H), 6.58 (br, 1H), 5.38 (s, 1H), 4.07–4.00 (m, 2H), 2.26 (s, 3H), 2.21–2.12 (m, 3H), 1.18–1.15 (t,  $J$  = 7.0 Hz, 14.0 Hz, 3H), 1.05 (s, 3H), 0.93 (s, 3H).

**Ethyl 4-(4-chlorophenyl)-2,7,7-trimethyl-5-oxo-1,4,5,6,7,8-hexahydroquinolin-3-carboxylate<sup>8, 9</sup> (4)**

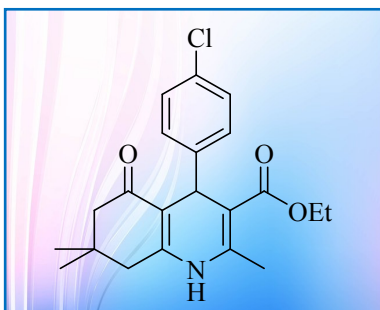

Pale yellow solid, mp = 246 – 248 °C

**IR (KBr, cm<sup>-1</sup>):** 3273, 3190, 2958, 1703, 1602, 1485, 1211.

**<sup>1</sup>H NMR** (500 MHz, CDCl<sub>3</sub>)  $\delta_{\text{H}}$  7.24–7.22 (d,  $J$  = 7.0 Hz, 2H), 7.16–7.15 (d,  $J$  = 4.5 Hz, 2H), 6.20 (br, 1H), 5.02 (s, 1H), 4.07–4.03 (m, 2H), 2.36 (s, 3H), 2.33–2.16 (m, 4H), 1.20–1.17 (t,  $J$  = 7.0 Hz, 14.0 Hz, 3H), 1.06 (s, 3H), 0.92 (s, 3H).

**<sup>13</sup>C NMR** (125 MHz, CDCl<sub>3</sub>)  $\delta_{\text{C}}$  195.6, 167.2, 148.4, 145.6, 143.7, 131.6, 129.4, 128.0, 111.8, 105.7, 59.9, 50.7, 41.0, 36.2, 32.7, 29.4, 28.1, 27.1, 19.4, 14.2, 13.7.

**Ethyl 4-(4-fluorophenyl)-2,7,7-trimethyl-5-oxo-1,4,5,6,7,8-hexahydroquinolin-3-carboxylate<sup>10</sup> (5)**

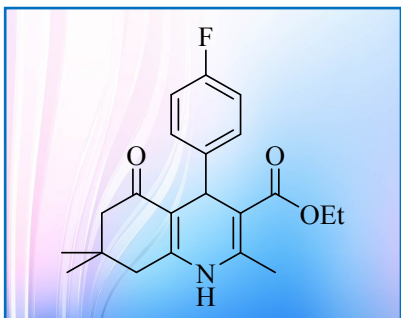

Pale yellow solid, mp = 184 – 187 °C

**IR (KBr, cm<sup>-1</sup>):** 3273, 3194, 2957, 1705, 1604, 1488, 1211.

**<sup>1</sup>H NMR** (500 MHz, CDCl<sub>3</sub>)  $\delta_{\text{H}}$  7.30–7.27 (q,  $J = 5.2$  Hz, 3H), 6.91–6.88 (t,  $J = 8.8$  Hz, 2H), 5.82 (s, 1H), 5.05 (s, 1H), 4.12–4.06 (m, 2H), 2.41 (s, 3H), 2.38–2.35 (m, 1H), 2.24–2.19 (m, 3H), 1.24–1.21 (t,  $J = 7.0$  Hz, 14.0 Hz, 3H), 1.10 (s, 3H), 0.95 (s, 3H).

**<sup>13</sup>C NMR** (125 MHz, CDCl<sub>3</sub>)  $\delta_{\text{C}}$  195.4, 167.3, 161.3 (d,  $J = 241.9$  Hz), 147.6, 143.3, 142.8, 129.5 (d,  $J = 7.9$  Hz), 114.7 (d,  $J = 21.4$  Hz), 114.6, 114.5, 112.3, 106.1, 59.9, 50.7, 41.2, 36.0, 32.7, 29.4, 28.1, 27.1, 19.5, 14.2, 13.7.

**Ethyl 2,7,7-trimethyl-5-oxo-4-(*p*-tolyl)-1,4,5,6,7,8-hexahydroquinolin-3-carboxylate<sup>9</sup> (6)**

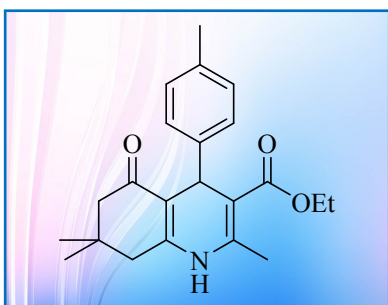

Pale yellow solid, mp = 261 – 263 °C

**IR (KBr, cm<sup>-1</sup>):** 3273, 3196, 2958, 1699, 1602, 1490, 1211.

**<sup>1</sup>H NMR** (500 MHz, CDCl<sub>3</sub>)  $\delta_{\text{H}}$  7.19–7.17 (d,  $J = 8.0$  Hz, 2H), 7.00–6.99 (d,  $J = 8.0$  Hz, 2H), 5.73 (br, 1H), 5.01 (s, 1H), 4.08–4.04 (m, 2H), 2.36 (s, 3H), 2.35–2.31 (m, 1H), 2.25 (s, 3H), 2.24–2.14 (m, 3H), 1.22–1.19 (t,  $J = 7.0$  Hz, 14.0 Hz, 3H), 1.07 (s, 3H), 0.95 (s, 3H).

$^{13}\text{C}$  NMR (125 MHz,  $\text{CDCl}_3$ )  $\delta_{\text{C}}$  195.4, 167.5, 147.6, 144.1, 143.1, 135.4, 133.4, 128.6, 127.9, 112.5, 106.4, 98.0, 66.6, 59.8, 50.7, 41.3, 36.1, 32.8, 29.4, 28.2, 27.3, 21.1, 19.5, 14.2.

**Ethyl 4-(4-(*tert*-butyl)phenyl)-2,7,7-trimethyl-5-oxo-1,4,5,6,7,8-hexahydroquinolin-3-carboxylate<sup>5</sup> (7)**

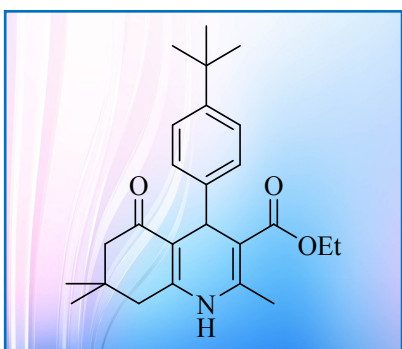

White solid, mp = 210 – 211 °C

$^1\text{H}$  NMR (500 MHz,  $\text{CDCl}_3$ )  $\delta_{\text{H}}$  7.23–7.19 (m, 4H), 7.03 (s, 1H), 5.04 (s, 1H), 4.10–4.07 (m, 2H), 2.34–2.30 (m, 2H), 2.28 (s, 3H), 2.23–2.19 (m, 3H), 1.25 (s, 9H), 1.24–1.21 (t,  $J = 7.5$  Hz, 14.5 Hz, 3H), 1.08 (s, 3H), 0.98 (s, 3H).

$^{13}\text{C}$  NMR (125 MHz,  $\text{CDCl}_3$ )  $\delta_{\text{C}}$  196.0, 167.7, 149.4, 148.5, 144.1, 143.7, 127.5, 124.8, 111.8, 106.1, 59.8, 50.8, 40.9, 35.9, 34.3, 32.7, 31.4, 31.3, 29.4, 27.4, 19.1, 14.2.

**Ethyl 4-(4-methoxyphenyl)-2,7,7-trimethyl-5-oxo-1,4,5,6,7,8-hexahydroquinolin-3-carboxylate<sup>9</sup> (8)**

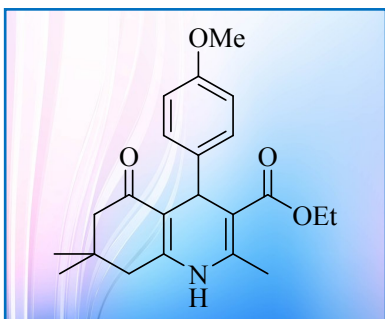

Pale yellow, mp = 255 – 257 °C

IR (KBr,  $\text{cm}^{-1}$ ): 3275, 3076, 2956, 1699, 1602, 1490, 1211.



**<sup>1</sup>H NMR** (500 MHz, CDCl<sub>3</sub>) δ<sub>H</sub> 7.22–7.20 (d, *J* = 9.0 Hz, 2H), 6.74–6.72 (d, *J* = 8.5 Hz, 2H), 5.71 (br, 1H), 4.99 (s, 1H), 4.08–4.04 (m, 2H), 3.74 (s, 3H), 2.37 (s, 3H), 2.35–2.32 (m, 1H), 2.22–2.14 (m, 3H), 1.21–1.19 (t, *J* = 7.0 Hz, 14.0 Hz, 3H), 1.08 (s, 3H), 0.94 (s, 3H).

**<sup>13</sup>C NMR** (125 MHz, CDCl<sub>3</sub>) δ<sub>C</sub> 195.5, 167.5, 157.8, 147.4, 139.5, 129.0, 113.3, 112.6, 106.4, 105.8, 59.8, 55.1, 50.7, 41.3, 35.7, 32.7, 29.4, 27.2, 19.5, 14.2.

**Ethyl 4-(2-hydroxy-5-nitrophenyl)-2,7,7-trimethyl-5-oxo-1,4,5,6,7,8-hexahydroquinolin-3-carboxylate<sup>5</sup> (9)**

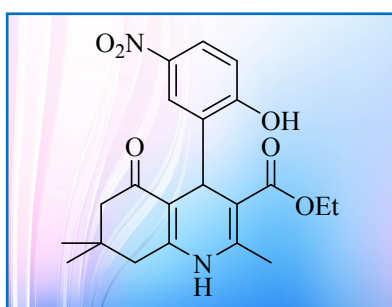

Pale yellow solid, mp = 210 – 213 °C

**IR (KBr, cm<sup>-1</sup>):** 3294, 3086, 2958, 1699, 1589, 1483, 1332, 1220, 729.

**<sup>1</sup>H NMR** (500 MHz, CDCl<sub>3</sub>) δ<sub>H</sub> 10.42 (s, 1H), 7.99–7.97 (dd, *J* = 3.0 Hz, 3.0 Hz, 1H), 7.84 (d, *J* = 2.5 Hz, 1H), 6.96–6.95 (d, *J* = 9.0 Hz, 1H), 6.14 (br, 1H), 5.10 (s, 1H), 4.01–3.97 (m, 2H), 2.54 (s, 3H), 2.38–2.34 (m, 4H), 1.11 (s, 3H), 1.06–1.03 (t, *J* = 7.0 Hz, 14.0 Hz, 3H), 0.92 (s, 3H).

**<sup>13</sup>C NMR** (125 MHz, CDCl<sub>3</sub>) δ<sub>C</sub> 198.5, 160.2, 151.2, 136.3, 134.5, 124.7, 124.3, 118.5, 110.7, 60.3, 55.1, 49.8, 49.2, 41.4, 32.8, 30.3, 29.0, 27.7, 27.3, 21.8, 19.5, 15.8, 13.9, 9.6.

**Ethyl 4-(2-carboxyphenyl)-2,7,7-trimethyl-5-oxo-1,4,5,6,7,8-hexahydroquinolin-3-carboxylate (10)**

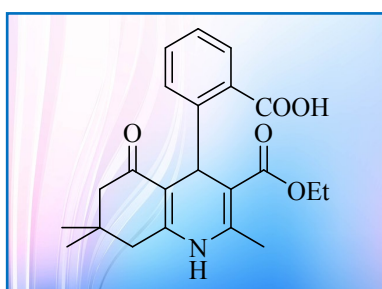

White solid, mp = 257 – 259 °C

**IR (KBr, cm<sup>-1</sup>):** 3292, 2956, 2873, 1699, 1575, 1479, 1390, 1220, 731.

**<sup>1</sup>H NMR** (500 MHz, CDCl<sub>3</sub>) δ<sub>H</sub> 14.28 (s, 1H), 7.58–7.57 (d, *J* = 8.0 Hz, 1H), 7.39–7.36 (t, *J* = 8.0 Hz, 1H), 7.32–7.31 (d, *J* = 7.5 Hz, 1H), 7.23–7.20 (t, *J* = 7.5 Hz, 1H), 6.87 (br, 1H), 5.32 (s, 1H), 4.11–4.02 (m, 2H), 2.48–2.40 (m, 2H), 2.39 (s, 3H), 2.30–2.20 (m, 1H), 2.20–2.17 (m, 1H), 1.13–1.10 (q, *J* = 7.0 Hz, 14.0 Hz, 6H), 0.98 (s, 3H).

**<sup>13</sup>C NMR** (125 MHz, CDCl<sub>3</sub>) δ<sub>C</sub> 198.7, 171.1, 166.5, 152.6, 144.7, 142.7, 132.8, 131.5, 129.3, 129.0, 126.8, 111.3, 108.1, 60.4, 49.8, 41.1, 34.7, 33.0, 29.1, 27.1, 19.1, 14.2.

**HR-ESI-MS** *m/z*: found [M+H]<sup>+</sup> C<sub>22</sub>H<sub>26</sub>NO<sub>5</sub><sup>+</sup> 384.1806, calcd for 384.1810

**Ethyl 4-(4-dimethylamino)phenyl)-2,7,7-trimethyl-5-oxo-1,4,5,6,7,8-hexahydroquinolin-3-carboxylate<sup>11</sup> (11)**

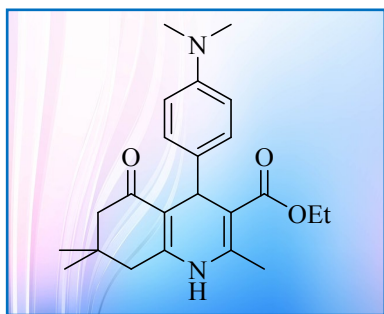

Pale yellow solid, mp = 225 – 227 °C

**IR (KBr, cm<sup>-1</sup>):** 3283, 3078, 2956, 1700, 1607, 1488, 1380, 1279.

**<sup>1</sup>H NMR** (500 MHz, CDCl<sub>3</sub>) δ<sub>H</sub> 7.20–7.18 (d, *J* = 8.5 Hz, 2H), 6.65 (s, 2H), 5.91 (brs, 1H), 4.98 (s, 1H), 4.11–4.07 (m, 2H), 2.90 (s, 6H), 2.38 (s, 3H), 2.24–2.22 (m, 1H), 2.22–2.19 (m, 3H), 1.25–1.23 (t, *J* = 7.0 Hz, 14.0 Hz, 3H), 1.09 (s, 3H), 0.98 (s, 3H).

**<sup>13</sup>C NMR** (125 MHz, CDCl<sub>3</sub>) δ<sub>C</sub> 195.5, 167.6, 147.5, 142.8, 128.7, 112.6, 106.5, 59.8, 50.8, 41.2, 35.4, 32.7, 29.4, 27.4, 19.5, 14.2.

**Ethyl 4-(benzo[*d*][1,3]dioxol-5-yl)-2,7,7-trimethyl-5-oxo-1,4,5,6,7,8-hexahydroquinolin-3-carboxylate<sup>12</sup> (12)**

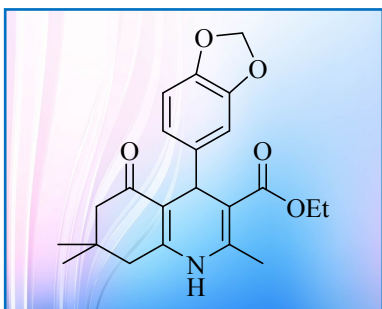

Pale yellow solid, mp = 225 – 228 °C

**IR (KBr, cm<sup>-1</sup>):** 3278, 3080, 2954, 1485, 1685, 1598, 1379, 1209.

**<sup>1</sup>H NMR** (500 MHz, CDCl<sub>3</sub>)  $\delta_{\text{H}}$  6.79–6.76 (m, 2H), 6.64–6.63 (d,  $J$  = 8.0 Hz, 1H), 6.25 (br, 1H), 5.86–5.85 (d,  $J$  = 6.5 Hz, 2H), 4.97 (s, 1H), 4.09–4.05 (m, 2H), 2.34 (s, 3H), 2.32–2.29 (m, 1H), 2.22–2.18 (m, 3H), 1.23–1.20 (t,  $J$  = 7.0 Hz, 14.0 Hz, 3H), 1.06 (s, 3H), 0.95 (s, 3H).

**<sup>13</sup>C NMR** (125 MHz, CDCl<sub>3</sub>)  $\delta_{\text{C}}$  195.7, 167.5, 148.3, 148.2, 147.2, 145.6, 143.3, 141.4, 121.1, 112.1, 108.7, 107.7, 106.2, 100.6, 59.9, 50.8, 41.0, 36.3, 32.7, 29.4, 27.3, 19.3, 14.3.

**Ethyl 4-(furan-2-yl)-2,7,7-trimethyl-5-oxo-1,4,5,6,7,8-hexahydroquinoline-3-carboxylate<sup>13</sup> (13)**

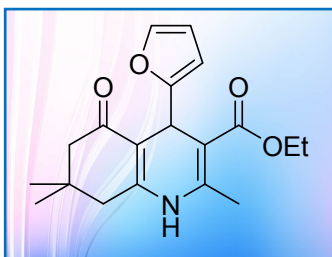

White solid, mp = 246 – 248 °C

**IR (KBr, cm<sup>-1</sup>):** 3280, 3080, 2960, 1672, 2604, 1487, 1215.

**<sup>1</sup>H NMR** (500 MHz, CDCl<sub>3</sub>)  $\delta_{\text{H}}$  7.18 (s, 1H), 6.20–6.19 (dd,  $J$  = 1.5 Hz, 3.0 Hz, 1H), 6.01–6.00 (d,  $J$  = 3.0 Hz, 1H), 5.25 (s, 1H), 4.18–4.10 (m, 2H), 2.36 (s, 3H), 2.25–2.24 (d,  $J$  = 7.5 Hz, 2H), 1.25 (s, 6H), 1.09 (s, 3H), 1.01 (s, 3H).

**<sup>13</sup>C NMR** (125 MHz, CDCl<sub>3</sub>)  $\delta_{\text{C}}$  195.3, 167.2, 157.9, 148.9, 144.3, 140.7, 110.2, 109.0, 104.8, 103.1, 59.9, 50.7, 41.3, 32.7, 30.2, 29.7, 29.5, 26.9, 22.7, 19.5, 14.3.

**Ethyl 4-(5-bromofuran-2-yl)-2,7,7-trimethyl-5-oxo-1,4,5,6,7,8-hexahydroquinoline-3-carboxylate (14)**

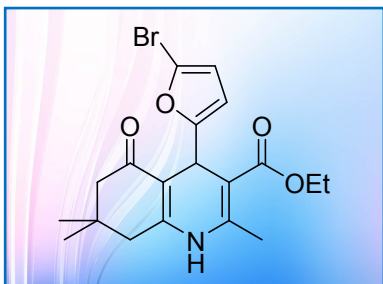

White solid, mp = 215 – 218 °C

**IR (KBr, cm<sup>-1</sup>):** 3277, 3078, 1678, 1604, 1485, 1211.

**<sup>1</sup>H NMR** (500 MHz, CDCl<sub>3</sub>) δ<sub>H</sub> 6.23 (br, 1H), 6.11–6.10 (d, *J* = 3.5 Hz, 1H), 6.00 (d, *J* = 30 Hz, 1H), 5.20 (s, 1H), 4.21–4.10 (m, 2H), 2.35 (s, 3H), 2.33–2.22 (m, 4H), 1.28–1.26 (t, *J* = 7.0 Hz, 14.0 Hz, 3H), 1.10 (s, 3H), 1.05 (s, 3H).

**<sup>13</sup>C NMR** (125 MHz, CDCl<sub>3</sub>) δ<sub>C</sub> 195.4, 167.1, 159.9, 149.7, 144.7, 118.9, 112.0, 108.1, 107.7, 102.6, 60.0, 50.7, 41.1, 32.8, 30.6, 29.6, 26.8, 19.5, 14.3.

**HR-ESI-MS** *m/z*: calcd for [M+H]<sup>+</sup> C<sub>19</sub>H<sub>23</sub>BrNO<sub>4</sub><sup>+</sup>: 408.0810, found: 408.0631

**Ethyl 4-(5-chlorofuran-2-yl)-2,7,7-trimethyl-5-oxo-1,4,5,6,7,8-hexahydroquinoline-3-carboxylate (15)**

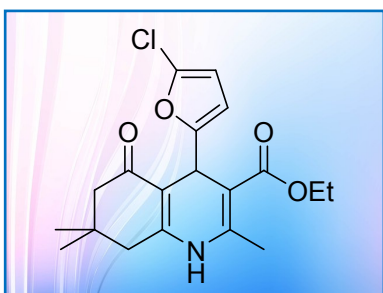

White solid, mp = 195 – 198 °C

**IR (KBr, cm<sup>-1</sup>):** 3277, 3076, 1677, 1602, 1485, 1215.

**<sup>1</sup>H NMR** (500 MHz, CDCl<sub>3</sub>) δ<sub>H</sub> 6.67 (br, 1H), 6.01–6.00 (d, *J* = 3.0 Hz, 1H), 5.96 (d, *J* = 3.5 Hz, 1H), 5.18 (s, 1H), 4.21–4.12 (m, 2H), 2.34 (s, 3H), 2.27–2.24 (m, 4H), 1.28–1.26 (t, *J* = 7.0 Hz, 14.5 Hz, 3H), 1.10 (s, 3H), 1.05 (s, 3H).

**<sup>13</sup>C NMR** (125 MHz, CDCl<sub>3</sub>) δ<sub>C</sub> 195.6, 167.1, 157.5, 150.1, 144.9, 133.6, 107.9, 107.1, 106.8, 102.4, 60.0, 50.7, 41.0, 32.8, 30.6, 29.6, 26.8, 19.4, 14.3.

**HR-ESI-MS** *m/z*: calcd for [M]<sup>+</sup> C<sub>19</sub>H<sub>23</sub>ClNO<sub>4</sub><sup>+</sup>: 363.1237, found: 363.1193

**Ethyl 4-(5-(hydroxymethyl)furan-2-yl)-2,7,7-trimethyl-5-oxo-1,4,5,6,7,8-hexahydroquinoline-3-carboxylate (16)**

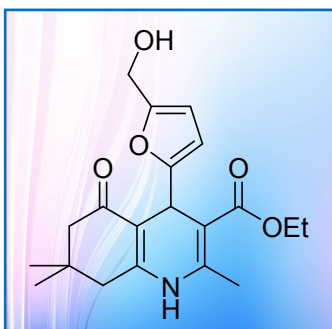

White solid, mp = 186 – 189 °C

**IR (KBr, cm<sup>-1</sup>):** 3800, 3273, 3070, 2954, 1681, 1602, 1481, 1375, 1207.

**<sup>1</sup>H NMR** (500 MHz, CDCl<sub>3</sub>)  $\delta_{\text{H}}$  6.15 (br, 1H), 6.11 – 6.10 (d,  $J$  = 3.0 Hz, 1H), 5.95 – 5.94 (d,  $J$  = 3.0 Hz, 1H), 5.21 (s, 1H), 4.45 (s, 2H), 4.19–4.12 (m, 2H), 2.33 (s, 3H), 2.26 – 2.21 (m, 4H), 1.28 – 1.25 (t,  $J$  = 7.5 Hz, 14.5 Hz, 4H), 1.10 (s, 3H), 1.03 (s, 3H).

**<sup>13</sup>C NMR** (125 MHz, CDCl<sub>3</sub>)  $\delta_{\text{C}}$  195.6, 167.3, 158.2, 152.1, 149.4, 144.4, 136.1, 108.7, 105.6, 103.0, 60.0, 57.6, 50.7, 41.2, 32.8, 30.4, 29.6, 26.8, 19.4, 14.3.

**Ethyl 4-(5-(4-chlorophenyl)furan-2-yl)-2,7,7-trimethyl-5-oxo-1,4,5,6,7,8-hexahydroquinoline-3-carboxylate (17)**

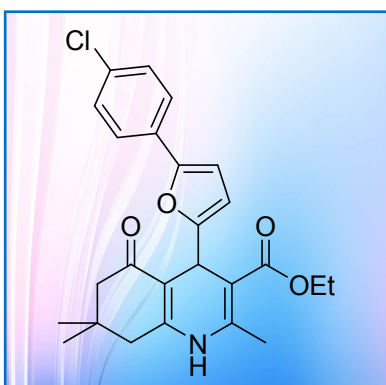

Pale yellow, mp = 185 – 188 °C

**IR (KBr, cm<sup>-1</sup>):** 3278, 3078, 1693, 1602, 1479, 1211.

**<sup>1</sup>H NMR** (500 MHz, CDCl<sub>3</sub>)  $\delta_{\text{H}}$  7.44–7.42 (d,  $J$  = 8.5 Hz, 2H), 7.26–7.24 (t,  $J$  = 6.0 Hz, 3H), 6.47–6.46 (d,  $J$  = 3.5 Hz, 1H), 6.07 (d,  $J$  = 3.0 Hz, 1H), 6.02 (br, 1H), 5.28

(s, 1H), 4.18–4.11 (m, 2H), 2.37 (s, 3H), 2.27–2.22 (m, 4H), 1.28–1.25 (t,  $J = 7.0$  Hz, 14.0 Hz, 3H), 1.10 (s, 3H), 1.02 (s, 3H).

$^{13}\text{C}$  NMR (125 MHz,  $\text{CDCl}_3$ )  $\delta_{\text{C}}$  195.3, 167.2, 158.1, 150.9, 149.3, 144.5, 132.1, 129.8, 128.7, 124.4, 108.7, 107.1, 106.5, 103.0, 60.0, 50.7, 41.3, 32.8, 30.4, 29.7, 29.6, 26.8, 19.5, 14.4.

**HR-ESI-MS**  $m/z$ : calcd for  $[\text{M}-\text{H}]^- \text{C}_{25}\text{H}_{25}\text{ClNO}_4^-$ : 438.1472, found: 438.1474.

**Ethyl 4-(benzofuran-2-yl)-2,7,7-trimethyl-5-oxo-1,4,5,6,7,8-hexahydroquinoline-3-carboxylate (18)**

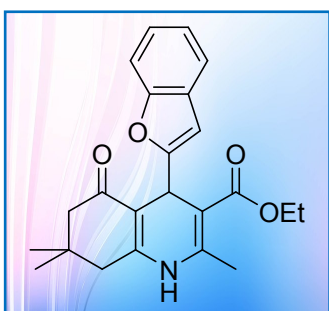

White solid, mp = 205 – 208 °C

**IR (KBr,  $\text{cm}^{-1}$ ):** 3280, 3084, 2953, 1699, 1602, 1489, 1379, 1209, 723

$^1\text{H}$  NMR (500 MHz,  $\text{CDCl}_3$ )  $\delta_{\text{H}}$  7.42–7.41 (d,  $J = 6.5$  Hz, 1H), 7.32–7.31 (d,  $J = 7.5$  Hz, 1H), 7.15–7.09 (m, 2H), 6.41 (s, 1H), 6.37 (br, 1H), 5.40 (s, 1H), 4.18–4.11 (m, 2H), 2.38 (s, 3H), 2.36–2.22 (m, 4H), 1.27–1.25 (t,  $J = 7.5$  Hz, 14.5 Hz, 3H), 1.07 (s, 3H), 1.00 (s, 3H).

$^{13}\text{C}$  NMR (125 MHz,  $\text{CDCl}_3$ )  $\delta_{\text{C}}$  195.5, 167.1, 160.7, 154.6, 149.8, 145.1, 129.0, 123.0, 122.2, 120.6, 110.9, 108.2, 102.3, 101.8, 60.0, 50.7, 41.1, 32.7, 30.9, 29.5, 27.0, 19.5, 14.3.

**HS-ESI-MS**  $m/z$ : calcd for  $[\text{M}]^+ \text{C}_{23}\text{H}_{25}\text{NO}_4^+$ : 379.1784, found: 379.1741.

**(1,3-Diphenylprop-2-yn-1-yl)piperidine<sup>14-16</sup> (19)**

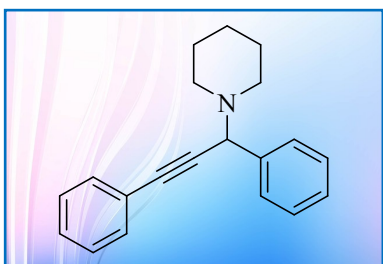

Yellow oil

**<sup>1</sup>H-NMR** (500 MHz, CDCl<sub>3</sub>): δ<sub>H</sub> 7.65 (d, *J* = 7.5 Hz, 2H), 7.53 (m, 2H), 7.39 – 7.28 (m, 6H), 4.83 (s, 1H), 2.59 (t, *J* = 4.5 Hz, 4H), 1.65 – 1.57 (m, 4H), 1.46 (dd, *J* = 11.0, 5.0 Hz, 2H).

**<sup>13</sup>C-NMR** (125 MHz, CDCl<sub>3</sub>): δ<sub>C</sub> 138.7, 132.0, 128.7, 128.4, 128.2, 127.6, 123.5, 88.0, 86.2, 62.5, 50.8, 29.8, 26.3, 24.6.

**GC-MS** (EI, 70 eV) *m/z* 275

### 1-(3-Phenyl-1-(*p*-tolyl)prop-2-yn-1-yl)piperidine<sup>17</sup> (20)

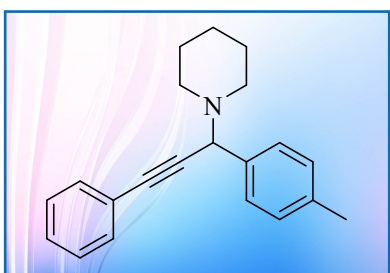

Yellow oil

**<sup>1</sup>H NMR** (500 MHz, DMSO-*d*<sub>6</sub>) δ<sub>H</sub> δ 7.53 (d, *J* = 4.0 Hz, 2H), 7.48 (d, *J* = 7.0 Hz, 2H), 7.41 (d, *J* = 4.0 Hz, 3H), 7.22–7.19 (m, 2H), 4.87 (s, 1H), 2.54–2.49 (m, 4H), 2.32 (s, 3H), 1.56–1.50 (m, 4H), 1.40 (m, 2H).

**<sup>13</sup>C NMR** (125 MHz, DMSO-*d*<sub>6</sub>) δ<sub>C</sub> 136.5, 135.3, 131.4, 128.6, 128.6, 128.3, 128.0, 122.5, 87.3, 86.2, 61.0, 50.0, 25.7, 24.0, 20.6.

**GC-MS** (EI, 70 eV) *m/z* 289

### 1-(1-(4-(*tert*-Butyl)phenyl)-3-phenylprop-2-yn-1-yl)piperidine<sup>18</sup> (21)

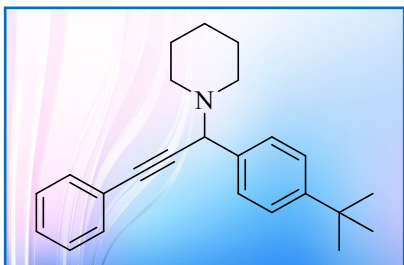

Yellow oil

**<sup>1</sup>H NMR** (500 MHz, DMSO-*d*<sub>6</sub>) δ<sub>H</sub> 7.49–7.42 (m, 4H), 7.38–7.33 (m, 5H), 4.81 (s, 1H), 2.49–2.39 (m, 4H), 1.47 (m, 4H), 1.38–1.31 (m, 2H), 1.24 (s, 9H).

$^{13}\text{C}$  NMR (125 MHz, DMSO- $d_6$ )  $\delta_{\text{C}}$  149.8, 135.3, 131.4, 128.6, 128.4, 127.8, 124.8, 122.5, 87.3, 86.3, 60.9, 50.1, 34.2, 31.1, 25.7, 24.0.

GC-MS (EI, 70 eV)  $m/z$  331

**1-(1-(4-Chlorophenyl)-3-phenylprop-2-yn-1-yl)piperidine<sup>17, 18</sup> (22)**

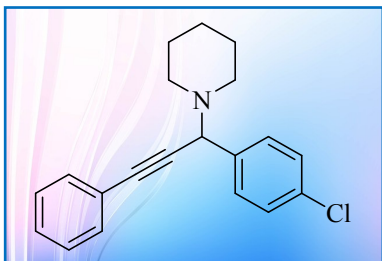

Yellow oil

$^1\text{H}$  NMR (500 MHz,  $\text{CDCl}_3$ )  $\delta_{\text{H}}$  7.59 (d,  $J = 8.5$  Hz, 2H), 7.51 (m, 2H), 7.3 (m, 5H), 4.80 (s, 1H), 2.56 (t,  $J = 5.0$  Hz, 4H), 1.64–1.56 (m, 4H), 1.46 (m, 2H).

$^{13}\text{C}$  NMR (125 MHz,  $\text{CDCl}_3$ )  $\delta_{\text{C}}$  143.4, 137.2, 133.5, 132.0, 130.0, 128.5, 128.4, 123.2, 88.5, 85.4, 61.8, 50.8, 26.2, 24.5.

GC-MS (EI, 70 eV)  $m/z$  309

**1-(1-(4-Fluorophenyl)-3-phenylprop-2-yn-1-yl)piperidine<sup>17</sup> (23)**

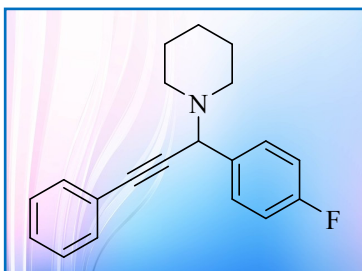

Yellow oil

$^1\text{H}$  NMR (500 MHz,  $\text{CDCl}_3$ )  $\delta_{\text{H}}$  7.61 (dd,  $J = 8.5, 5.5$  Hz, 2H), 7.51 (m, 2H), 7.35–7.32 (m, 3H), 7.04 (t,  $J = 8.5$  Hz, 2H), 4.80 (s, 1H), 2.56 (s, 4H), 1.59 (m, 4H), 1.46 (m, 2H).

$^{13}\text{C}$  NMR (125 MHz,  $\text{CDCl}_3$ )  $\delta_{\text{C}}$  163.3, 131.8, 130.2, 130.1, 128.3, 128.2, 115.0, 114.9, 61.6, 61.6, 50.6, 26.0, 24.3.

GC-MS (EI, 70 eV)  $m/z$  293

**1-(1-(2-Hydroxyphenyl)-3-phenylprop-2-yn-1-yl)piperidine<sup>19, 20</sup> (24)**



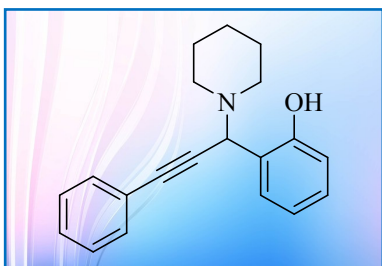

Yellow oil

**$^1\text{H NMR}$**  (500 MHz,  $\text{CDCl}_3$ )  $\delta_{\text{H}}$  7.61 – 7.56 (m, 3H), 7.40 – 7.37 (m, 3H), 7.26–7.23 (m, 1H), 6.91–6.87 (m, 2H), 5.12 (s, 1H), 2.78–2.73 (m, 3H), 1.70 (s, 4H), 1.54 (s, 1H).

**GC-MS** (EI, 70 eV)  $m/z$  291

**1-(1-(Furan-2-yl)-3-phenylprop-2-in-1-yl)piperidine<sup>21, 22</sup> (25)**

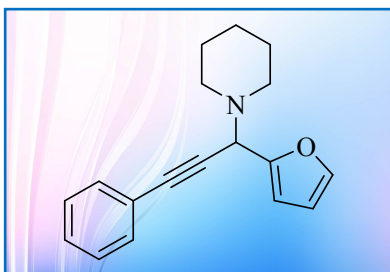

Yellow oil

**$^1\text{H NMR}$**  (500 MHz,  $\text{CDCl}_3$ )  $\delta_{\text{H}}$  7.50–7.49 (m, 2H), 7.42 (s, 1H), 7.33–7.32 (t,  $J = 3.0$  Hz, 6.5 Hz, 3H), 6.48 (d,  $J = 3.0$  Hz, 1H), 6.35–6.34 (m, 1H), 4.87 (s, 1H), 2.61–2.56 (m, 4H), 1.69–1.59 (m, 4H), 1.47–1.43 (m, 2H).

**$^{13}\text{C NMR}$**  (125 MHz,  $\text{CDCl}_3$ )  $\delta_{\text{C}}$  164.0, 160.7, 142.7, 132.0, 128.4, 117.3, 110.1, 109.4, 86.6, 84.0, 56.7, 50.7, 26.1, 24.5.

**GC-MS** (EI, 70 eV)  $m/z$  265

**4-(3-Phenyl-1-(piperidine-1-yl)prop-2-in-1-yl)pyridine<sup>23, 24</sup> (26)**

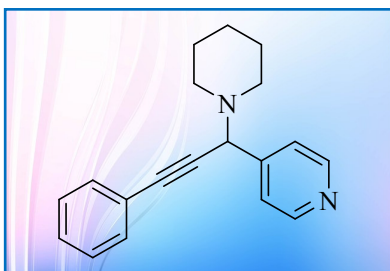

Yellow oil

**<sup>1</sup>H NMR** (500 MHz, CDCl<sub>3</sub>)  $\delta_{\text{H}}$  7.64 (d,  $J = 7.5$  Hz, 2H), 7.54–7.52 (m, 2H), 7.37–7.32 (m, 4H), 4.81 (s, 1H), 2.62–2.50 (m, 4H), 1.66–1.54 (m, 4H), 1.48–1.44 (m, 2H).

**GC-MS** (EI, 70 eV)  $m/z$  276

## Section S5.

### $^1\text{H}$ and $^{13}\text{C}$ NMR spectroscopy of ethyl 4-cyclohexyl-2,7,7-trimethyl-5-oxo-1,4,5,6,7,8-hexahydroquinolin-3-carboxylate (1)

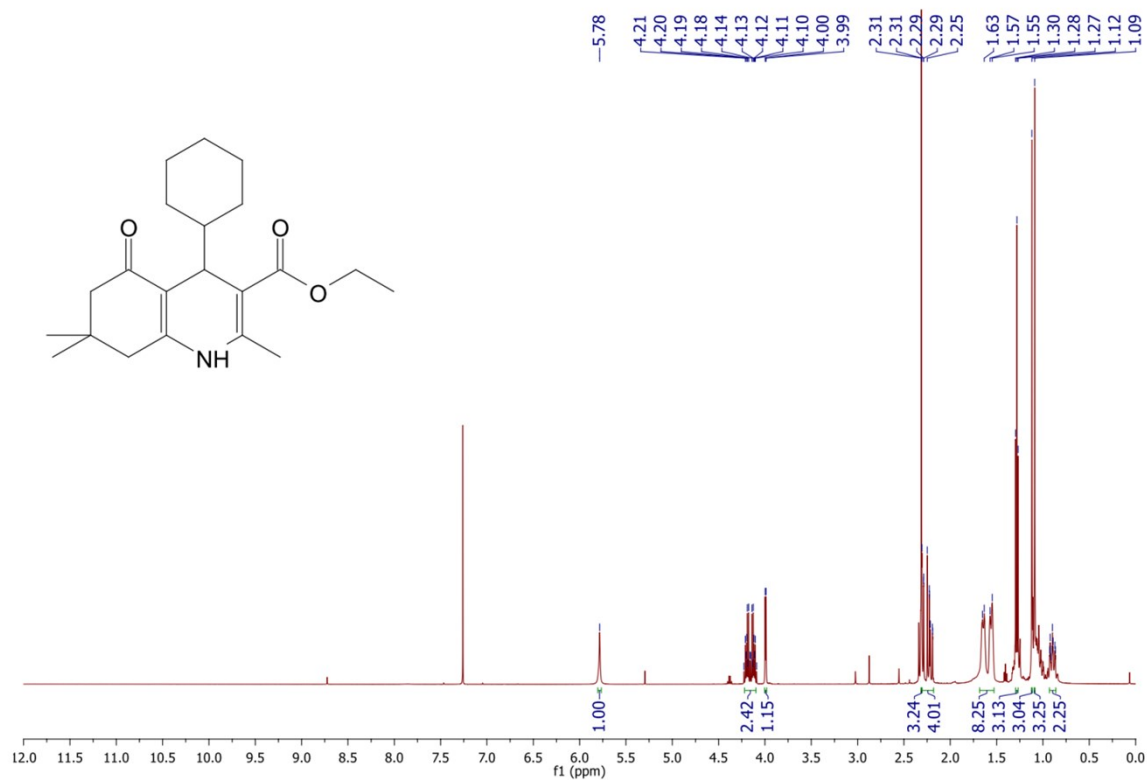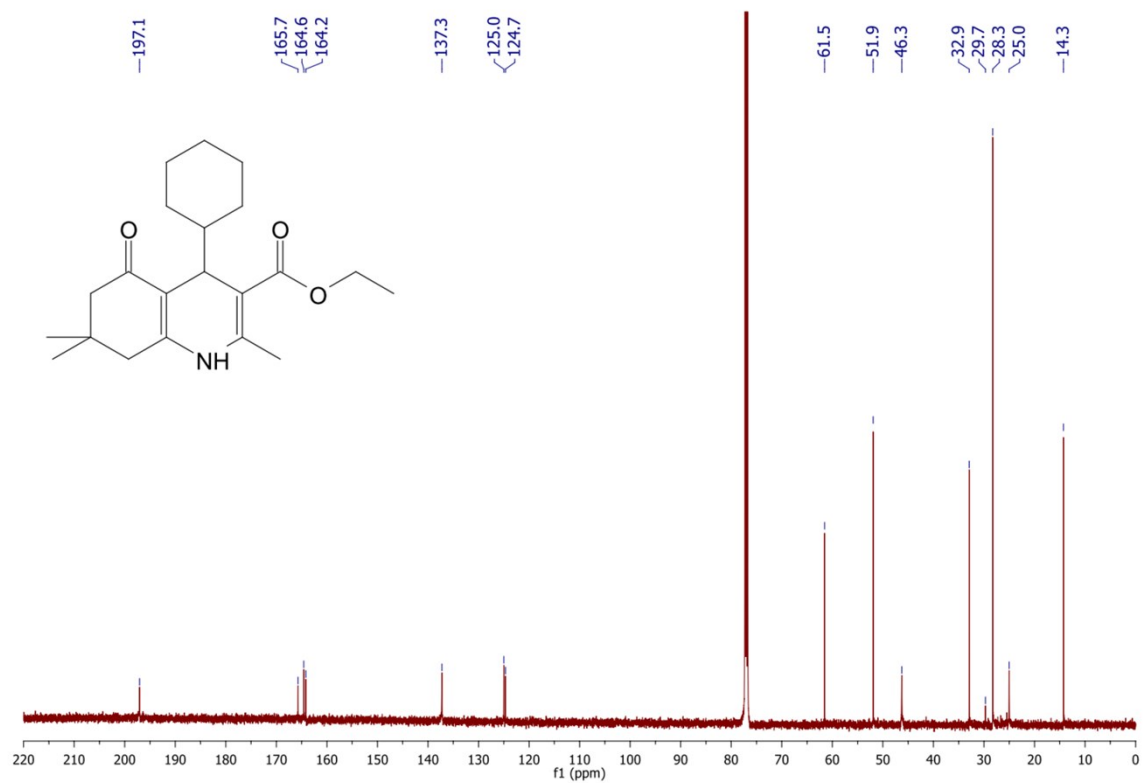

**$^1\text{H}$  and  $^{13}\text{C}$  NMR spectroscopy of ethyl 2,7,7-trimethyl-5-oxo-4-phenyl-1,4,5,6,7,8-hexahydroquinolin-3-carboxylate (2)**

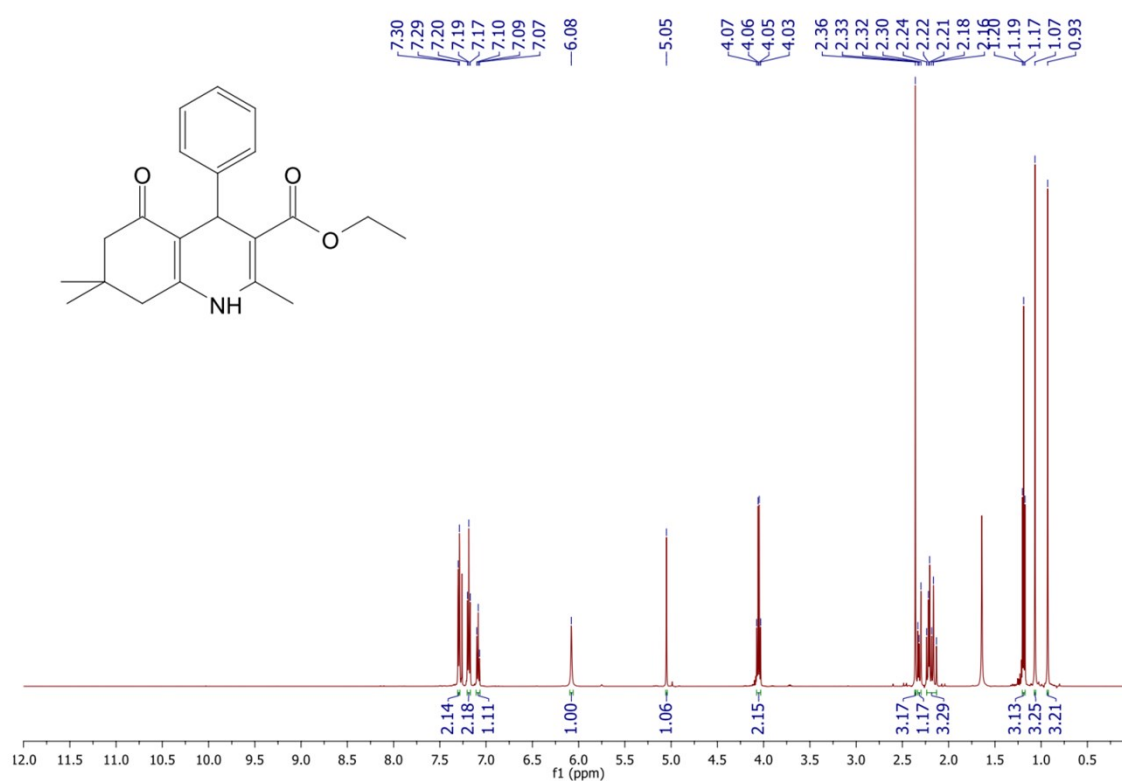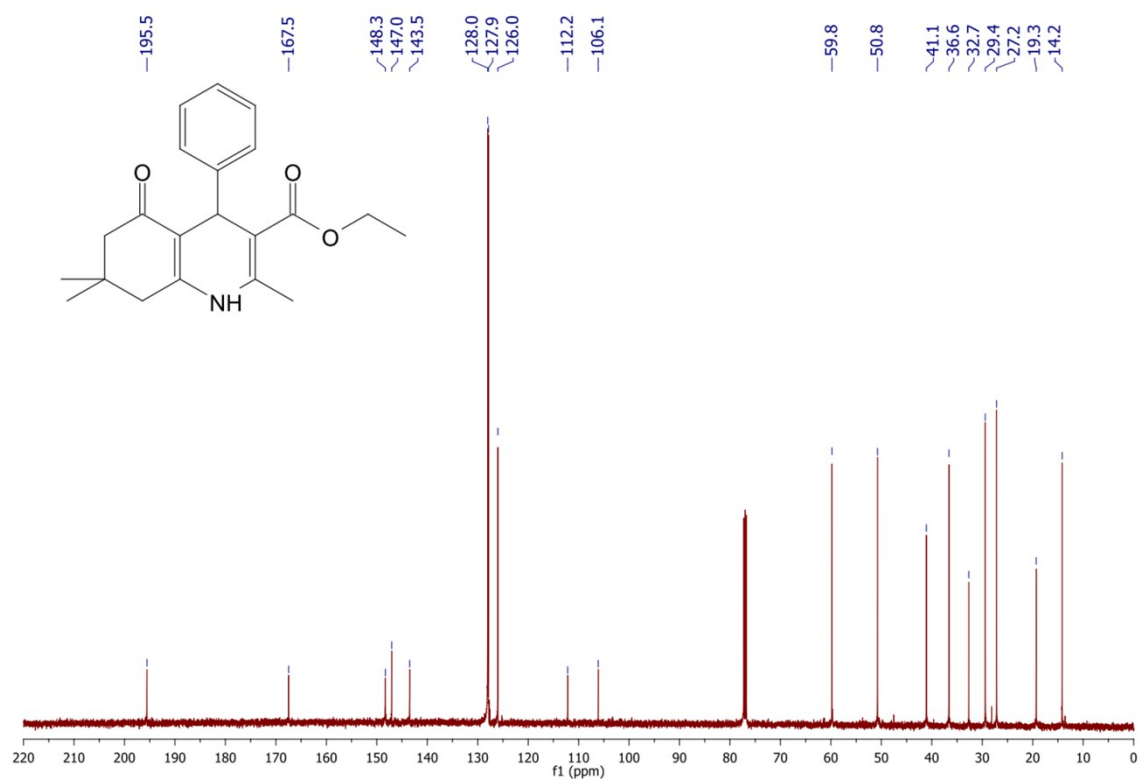

**<sup>1</sup>H and <sup>13</sup>C NMR spectroscopy of ethyl 4-(2-chlorophenyl)-2,7,7-trimethyl-5-oxo-1,4,5,6,7,8-hexahydroquinolin-3-carboxylate (3)**

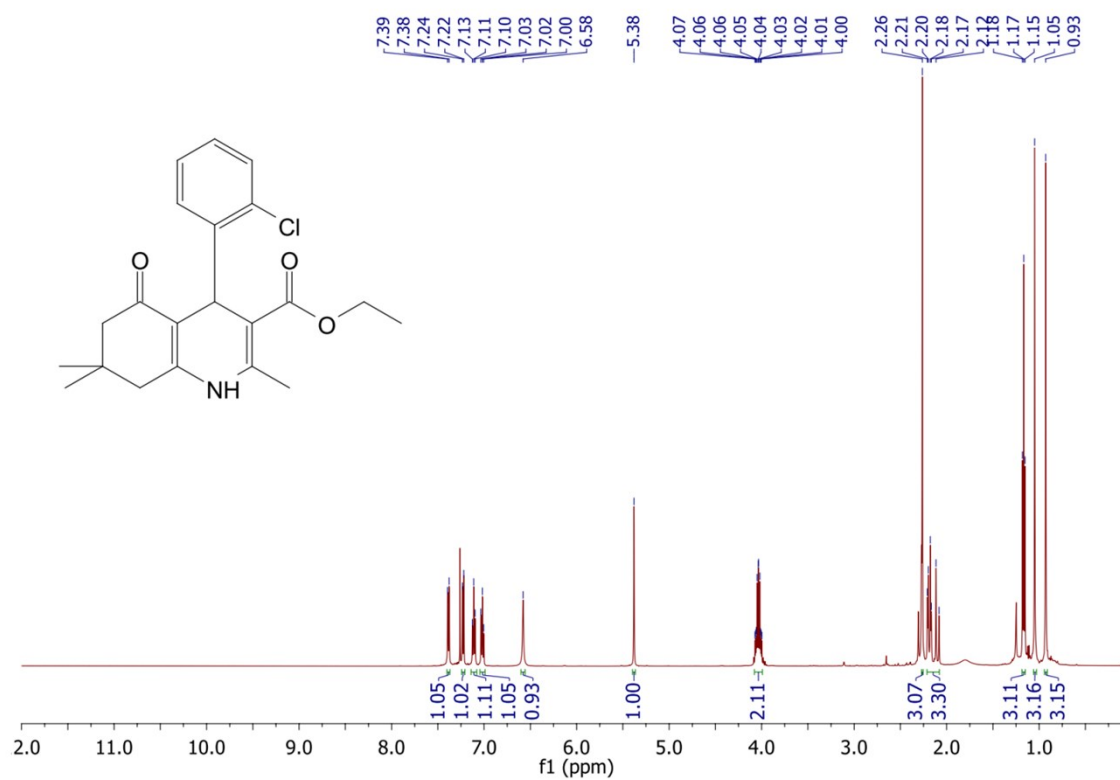

# <sup>1</sup>H and <sup>13</sup>C NMR spectroscopy of ethyl 4-(4-chlorophenyl)-2,7,7-trimethyl-5-oxo-1,4,5,6,7,8-hexahydroquinolin-3-carboxylate (4)

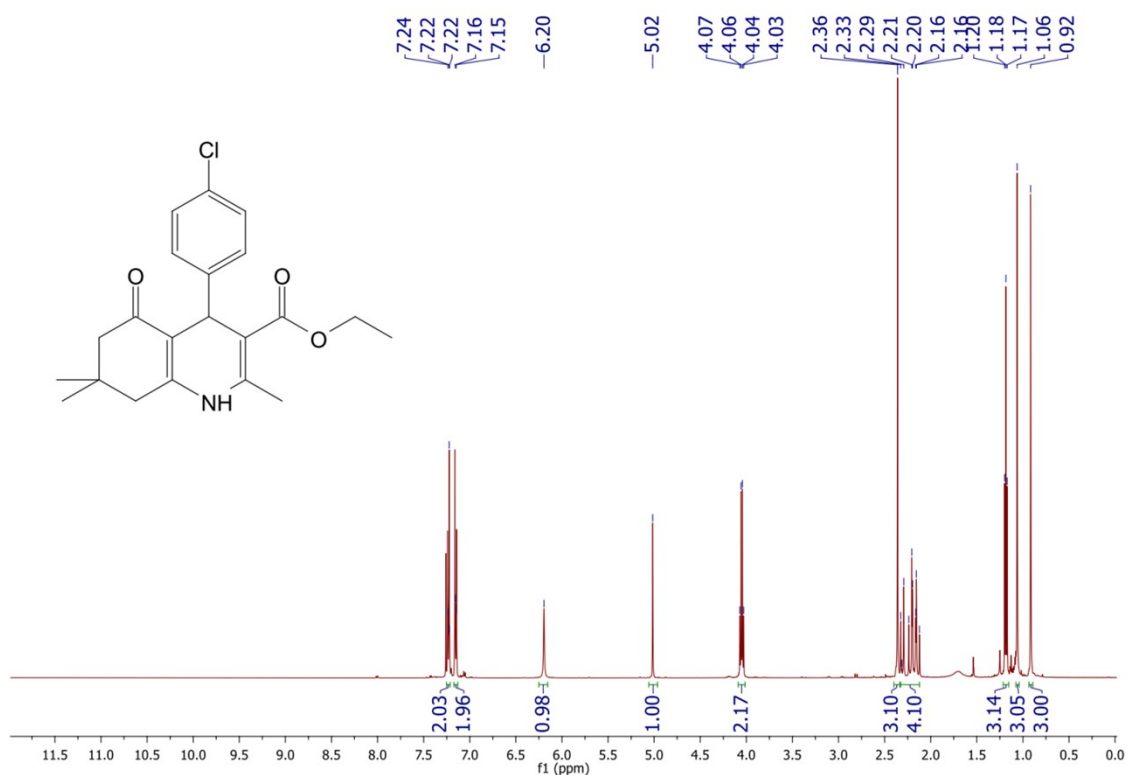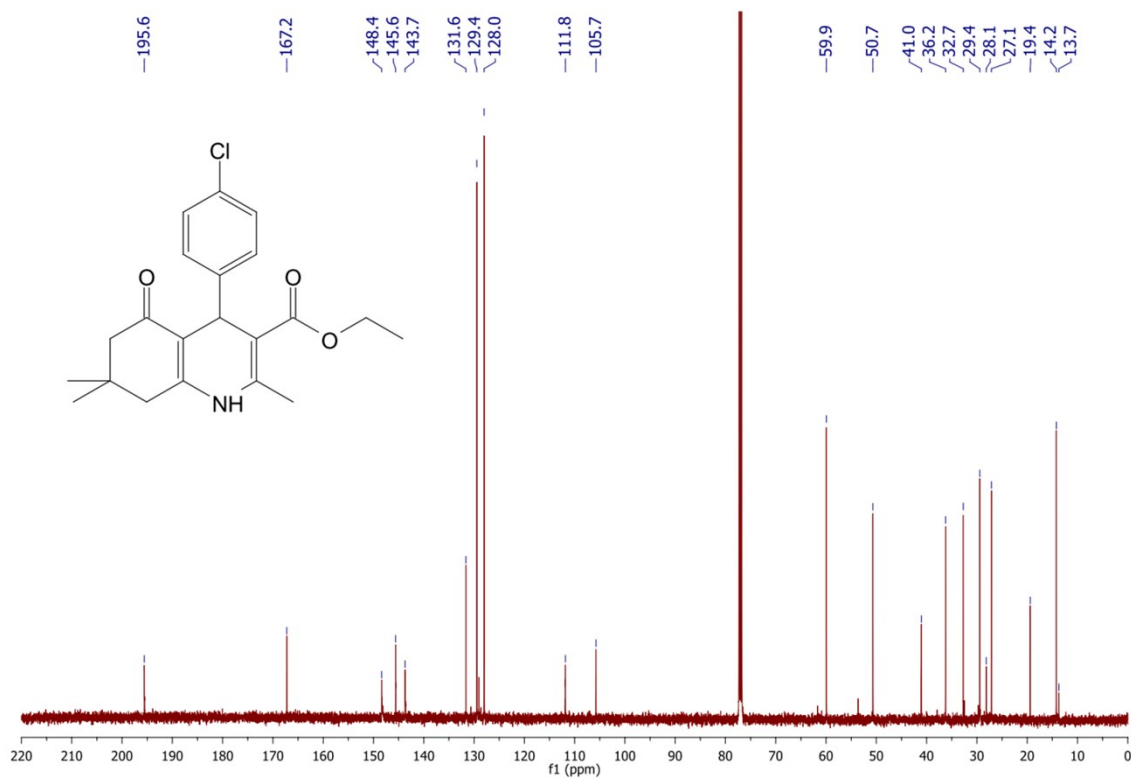

# <sup>1</sup>H and <sup>13</sup>C NMR spectroscopy of ethyl 4-(4-fluorophenyl)-2,7,7-trimethyl-5-oxo-1,4,5,6,7,8-hexahydroquinolin-3-carboxylate (5)

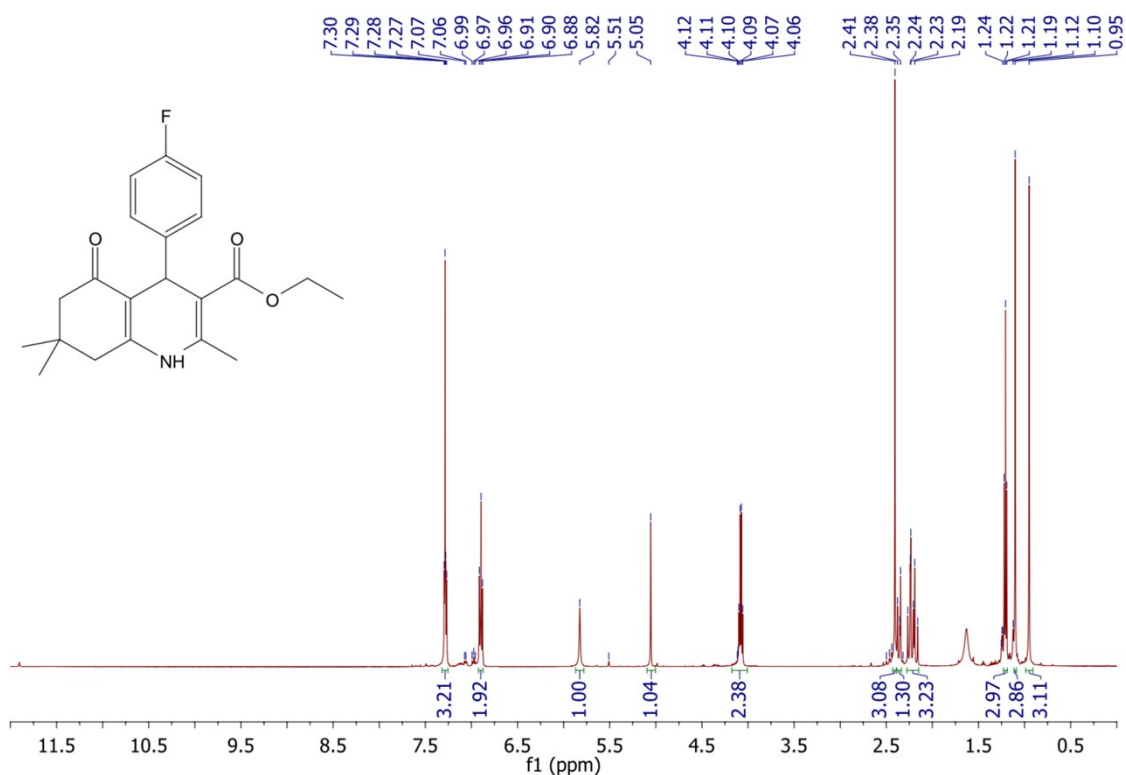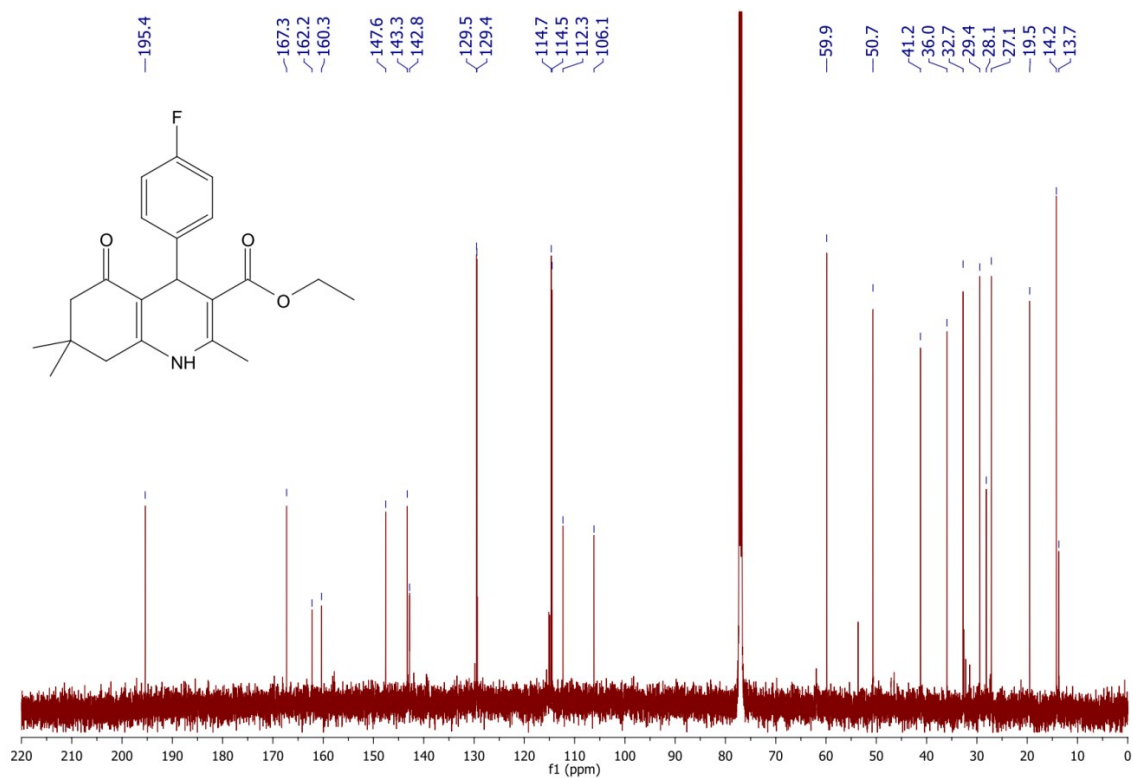

**$^1\text{H}$  and  $^{13}\text{C}$  NMR spectroscopy of ethyl 2,7,7-trimethyl-5-oxo-4-(*p*-tolyl)-1,4,5,6,7,8-hexahydroquinolin-3-carboxylate (6)**

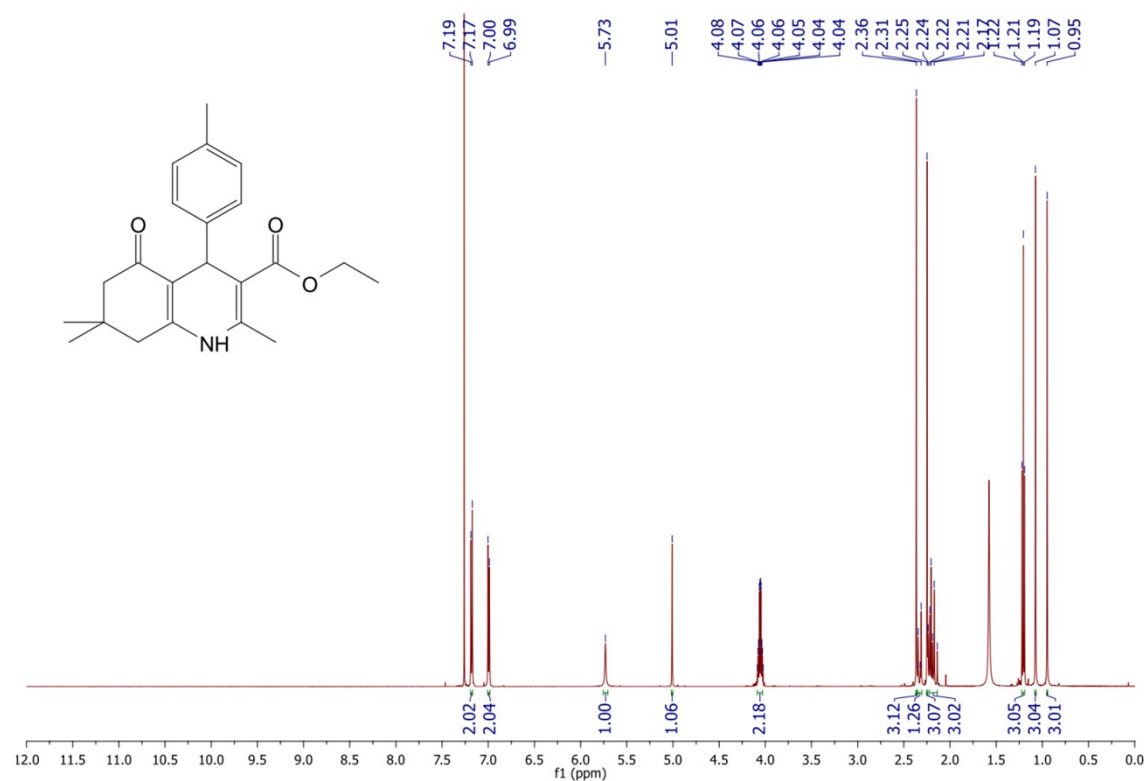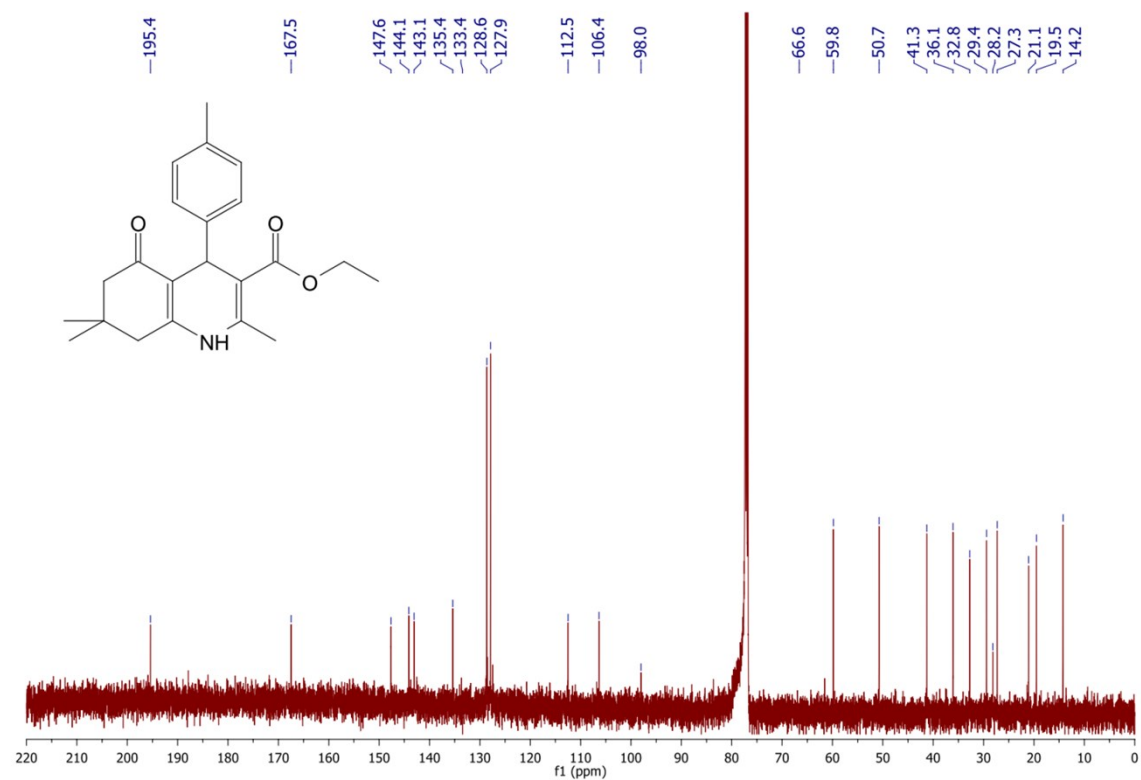



**$^1\text{H}$  and  $^{13}\text{C}$  NMR spectroscopy of ethyl 4-(4-(*tert*-butyl)phenyl)-2,7,7-trimethyl-5-oxo-1,4,5,6,7,8-hexahydroquinolin-3-carboxylate (7)**

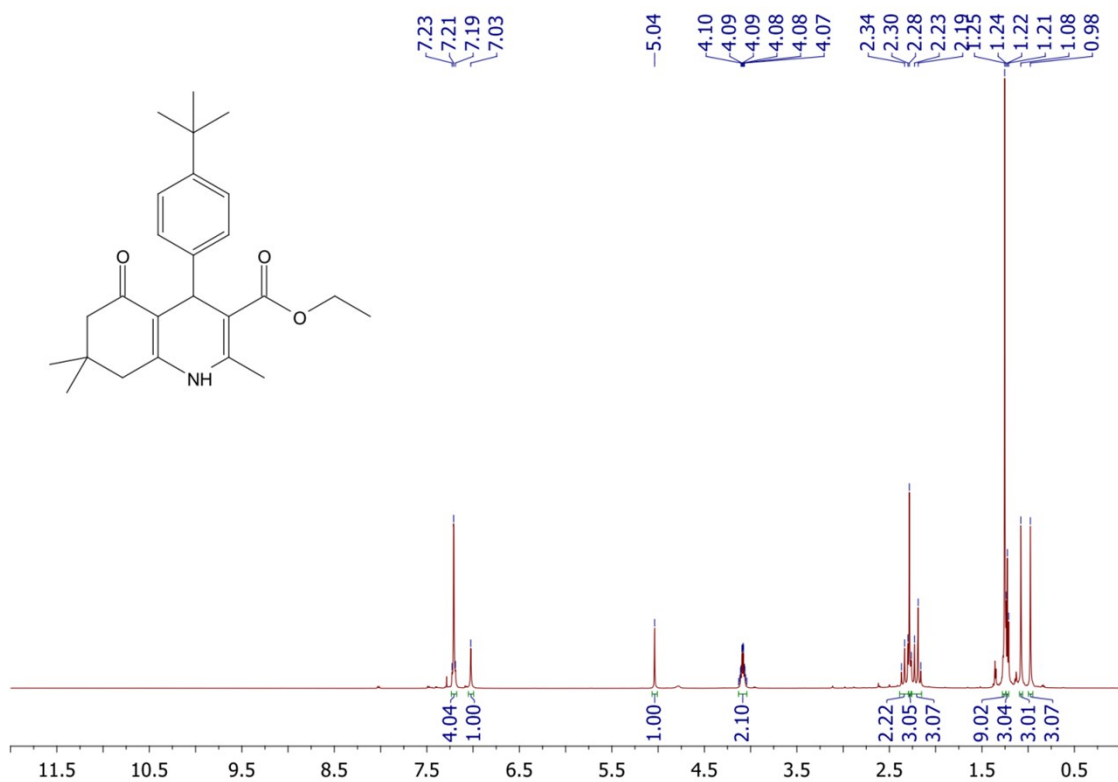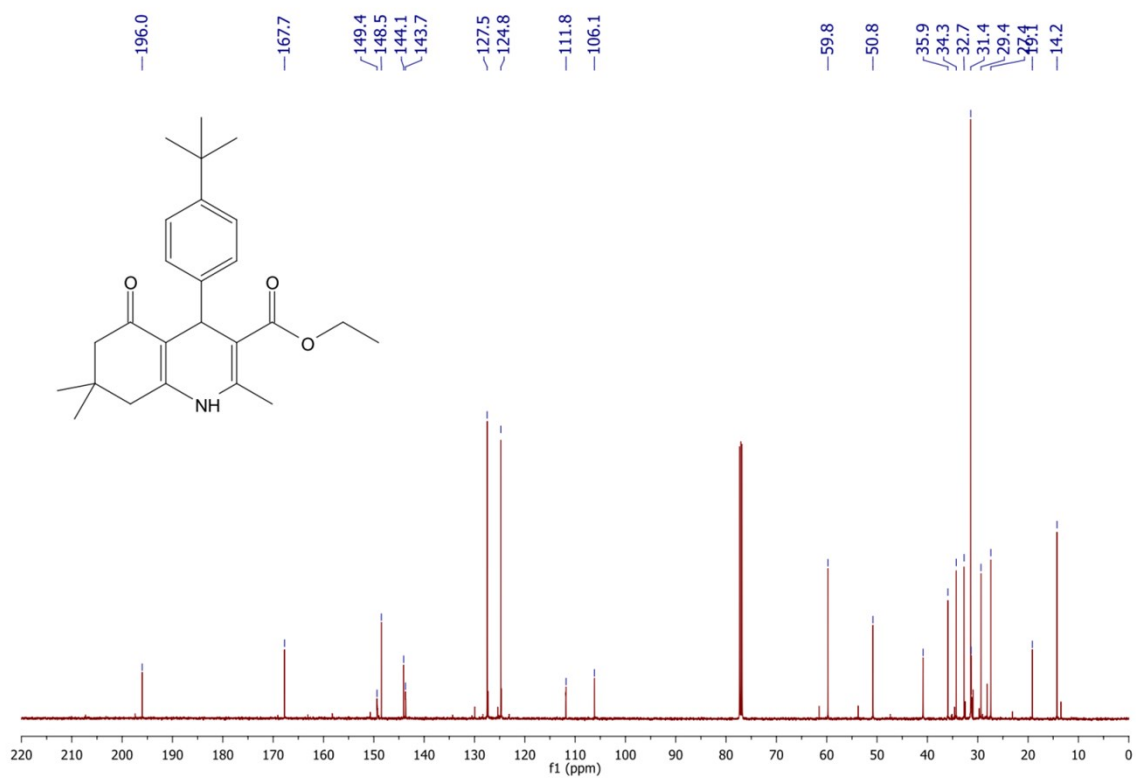

**$^1\text{H}$  and  $^{13}\text{C}$  NMR spectroscopy of ethyl 4-(4-methoxyphenyl)-2,7,7-trimethyl-5-oxo-1,4,5,6,7,8-hexahydroquinolin-3-carboxylate (8)**

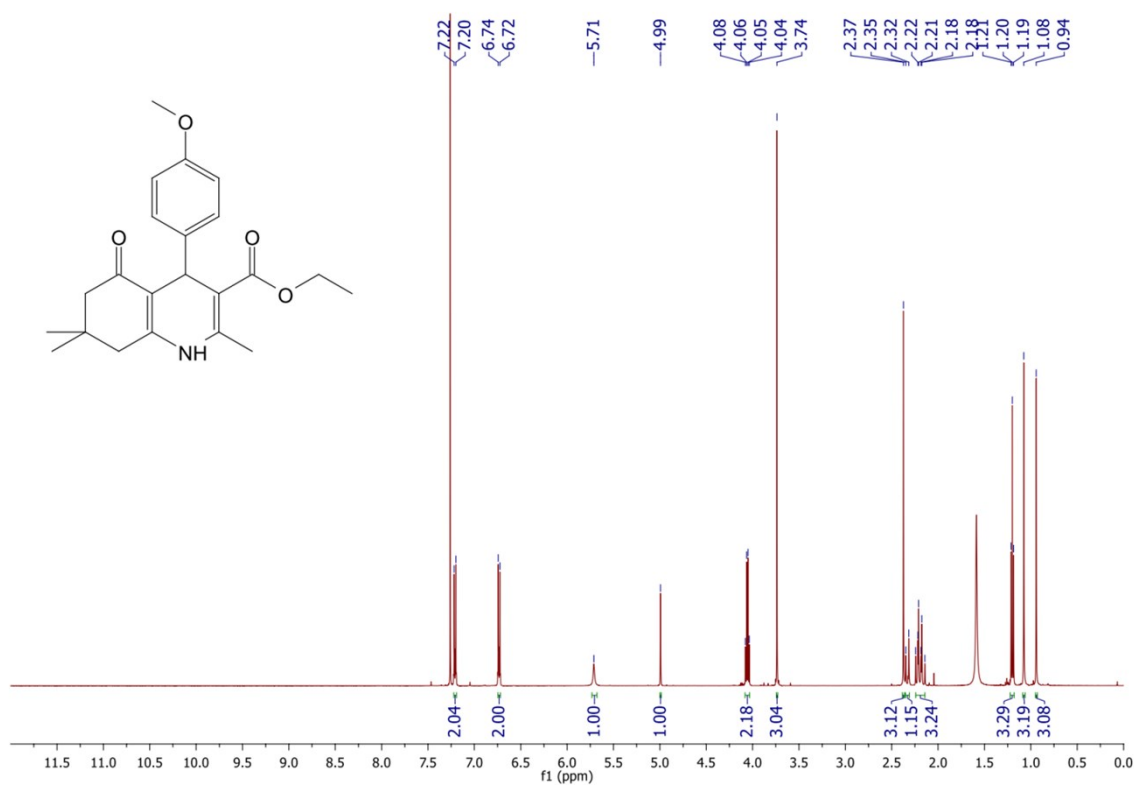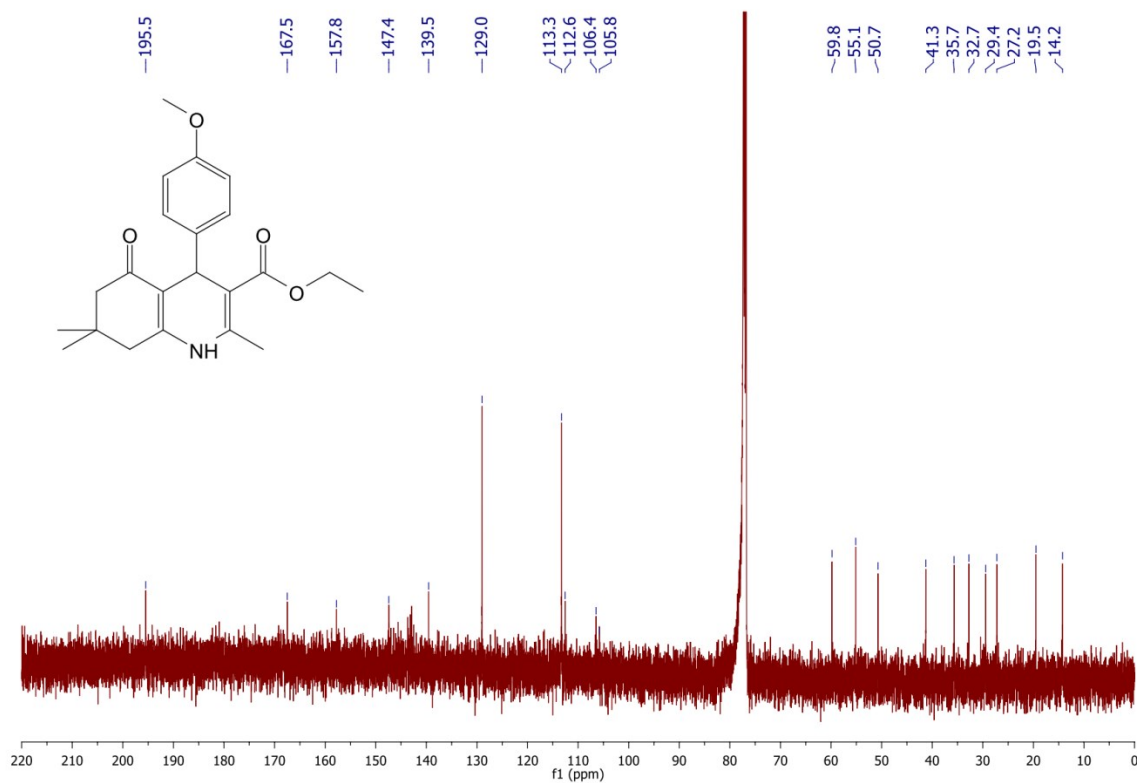

**$^1\text{H}$  and  $^{13}\text{C}$  NMR spectroscopy of ethyl 4-(2-hydroxy-5-nitrophenyl)-2,7,7-trimethyl-5-oxo-1,4,5,6,7,8-hexahydroquinolin-3-carboxylate (9)**

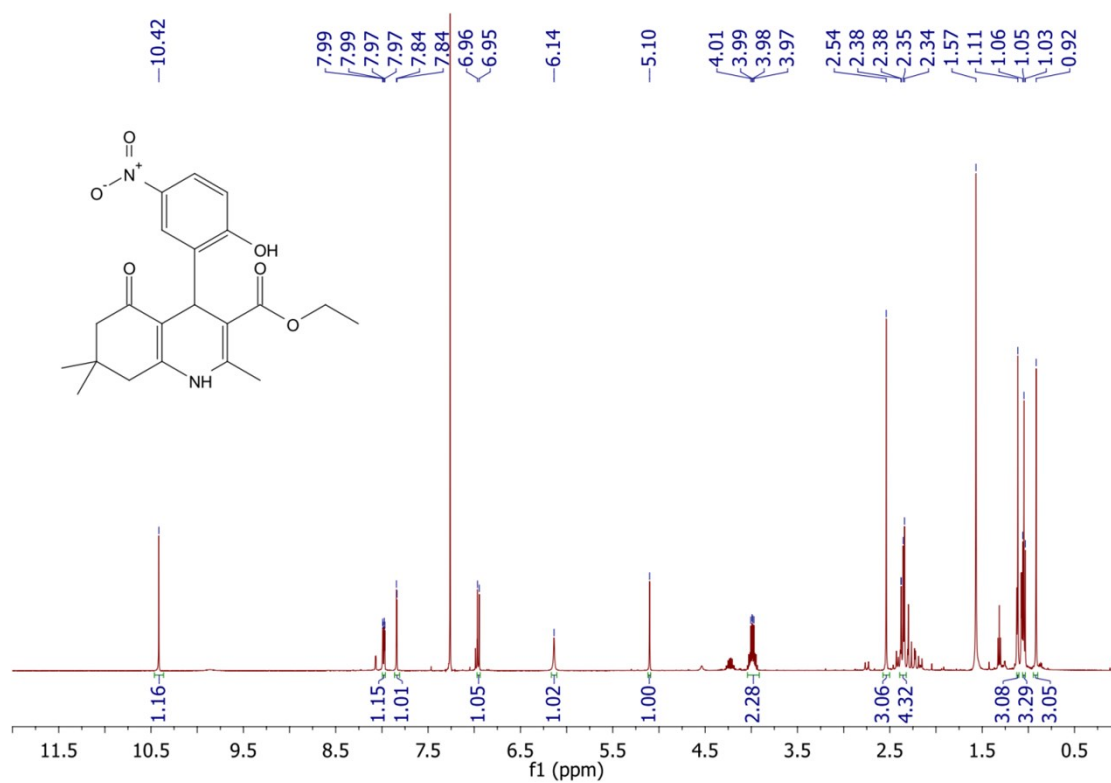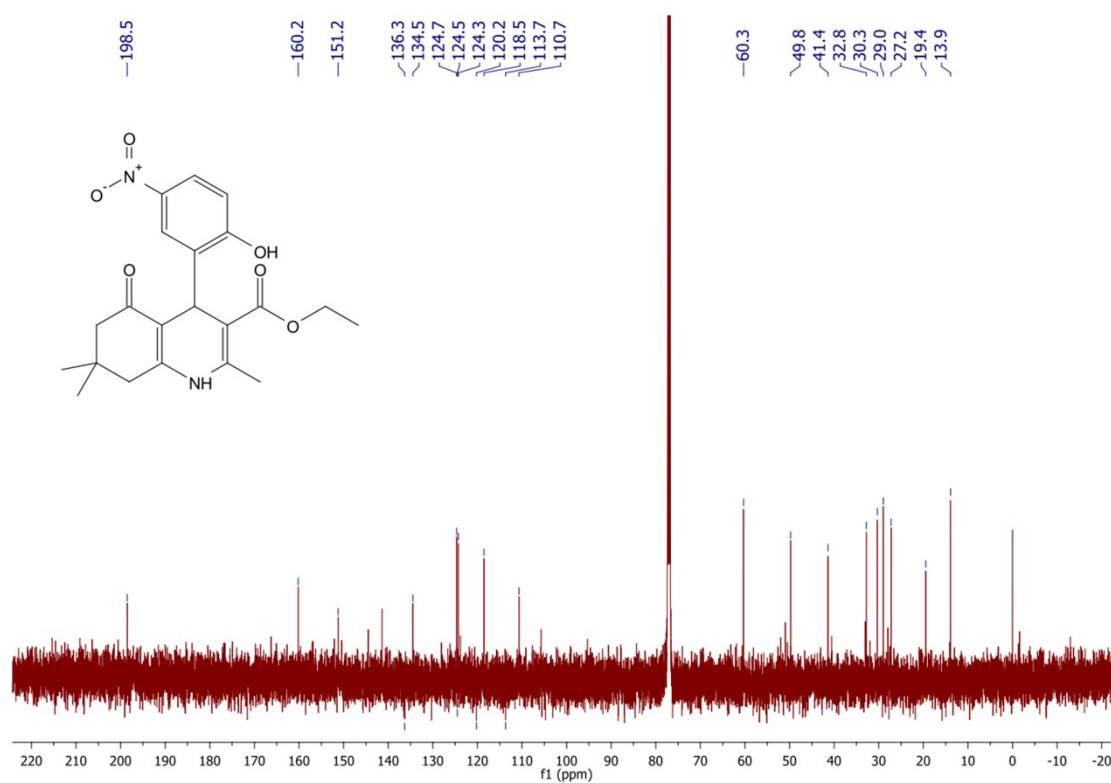

**$^1\text{H}$ ,  $^{13}\text{C}$  NMR and HR-ESI-MS spectroscopy of ethyl 4-(2-carboxyphenyl)-2,7,7-trimethyl-5-oxo-1,4,5,6,7,8-hexahydroquinolin-3-carboxylate (10)**

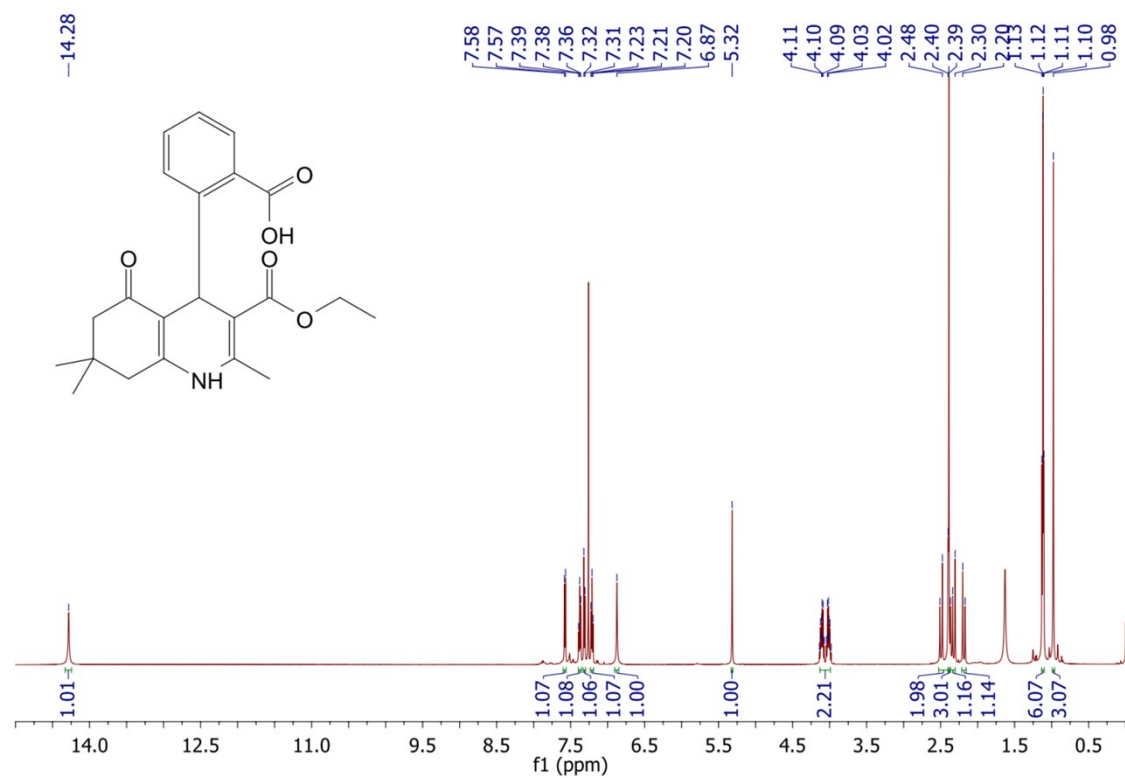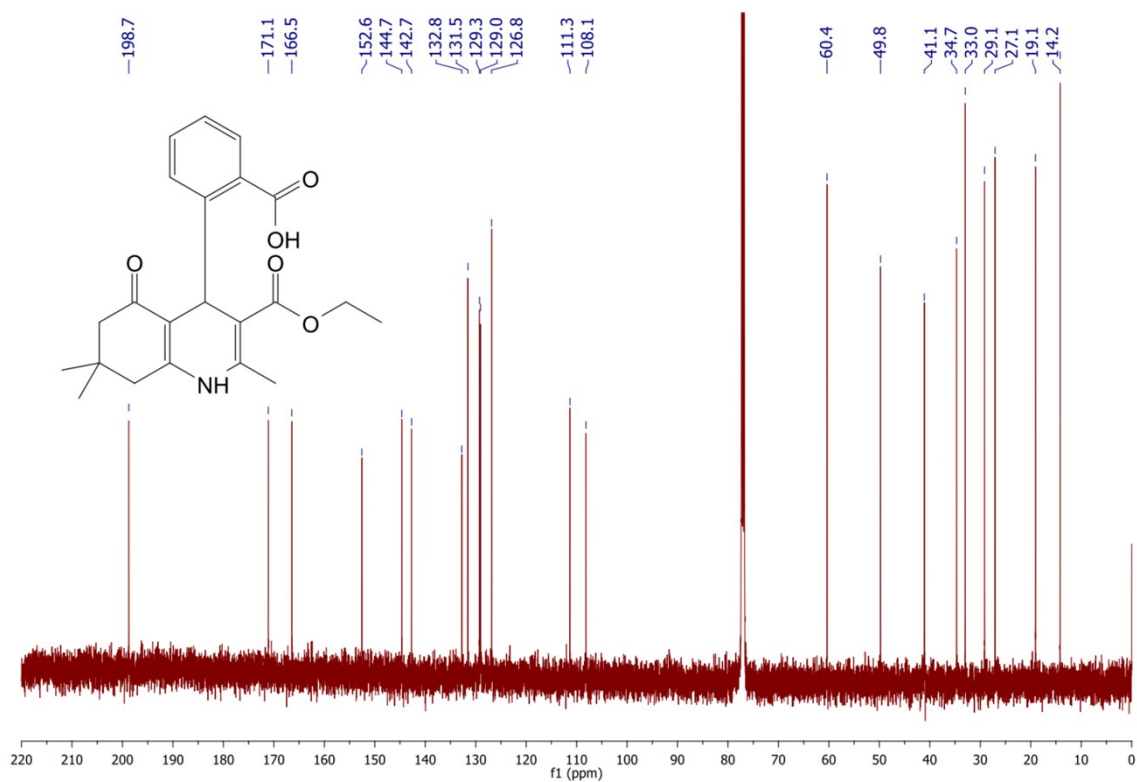

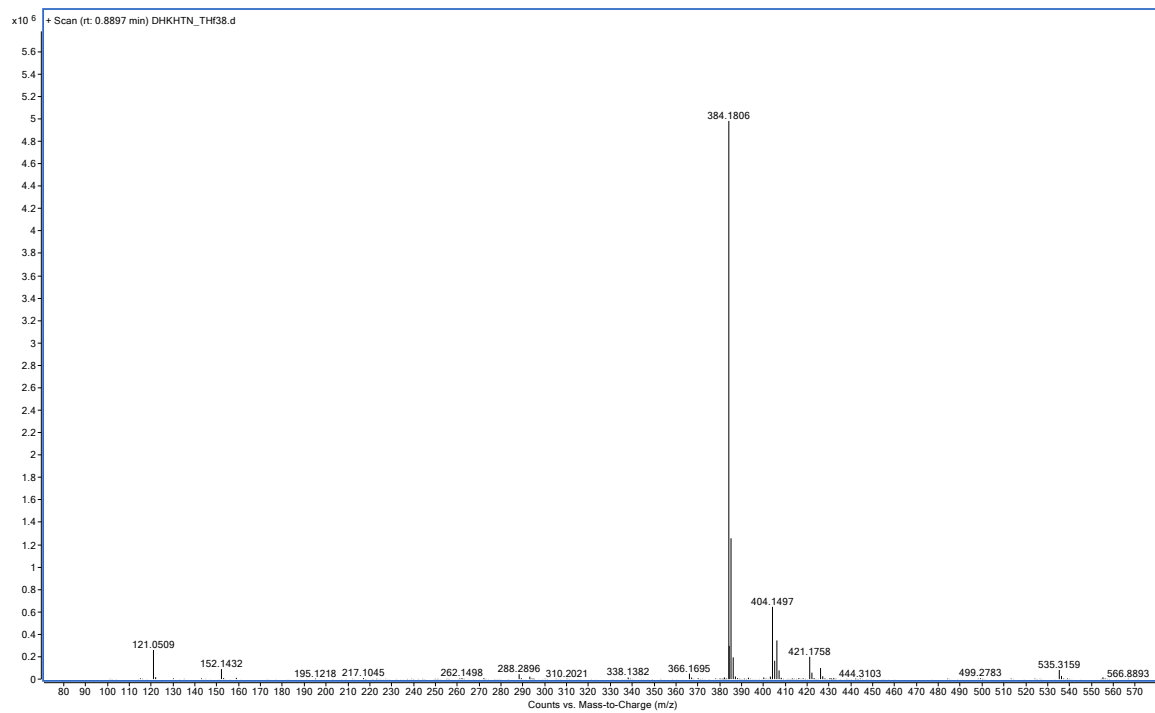

# $^1\text{H}$ and $^{13}\text{C}$ NMR spectroscopy of ethyl 4-(4-dimethylamino)phenyl)-2,7,7-trimethyl-5-oxo-1,4,5,6,7,8-hexahydroquinolin-3-carboxylate (11)

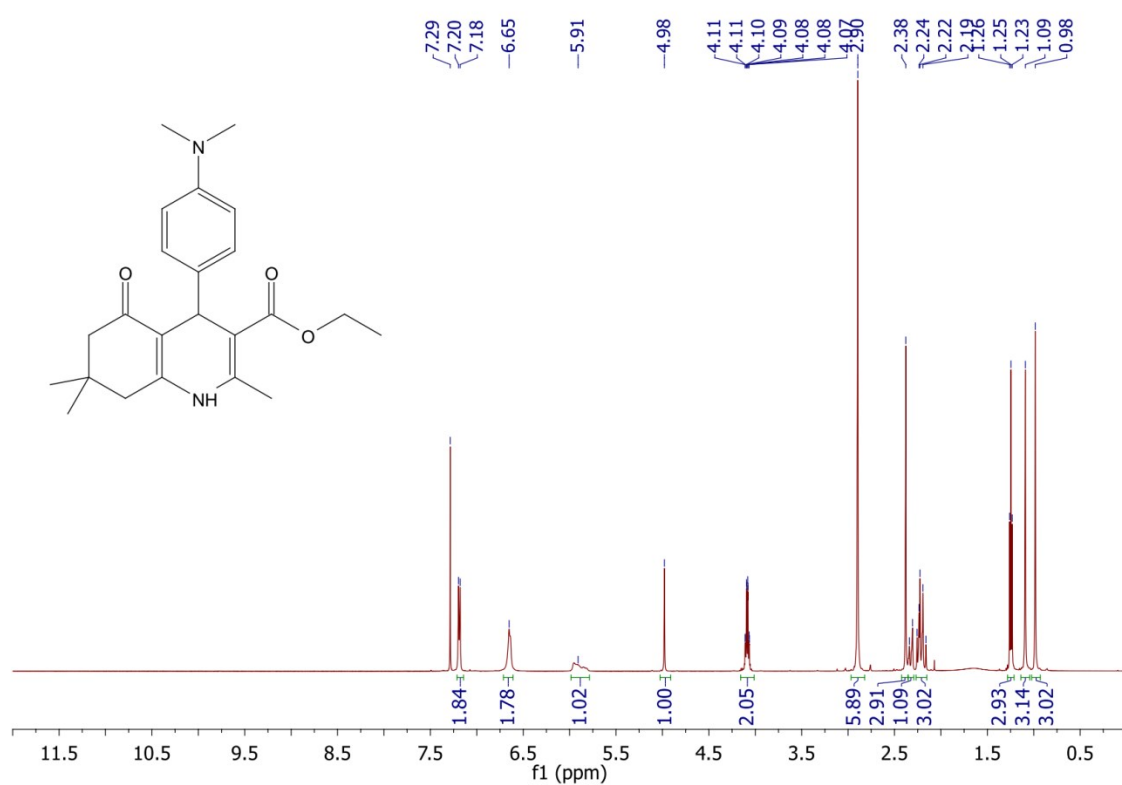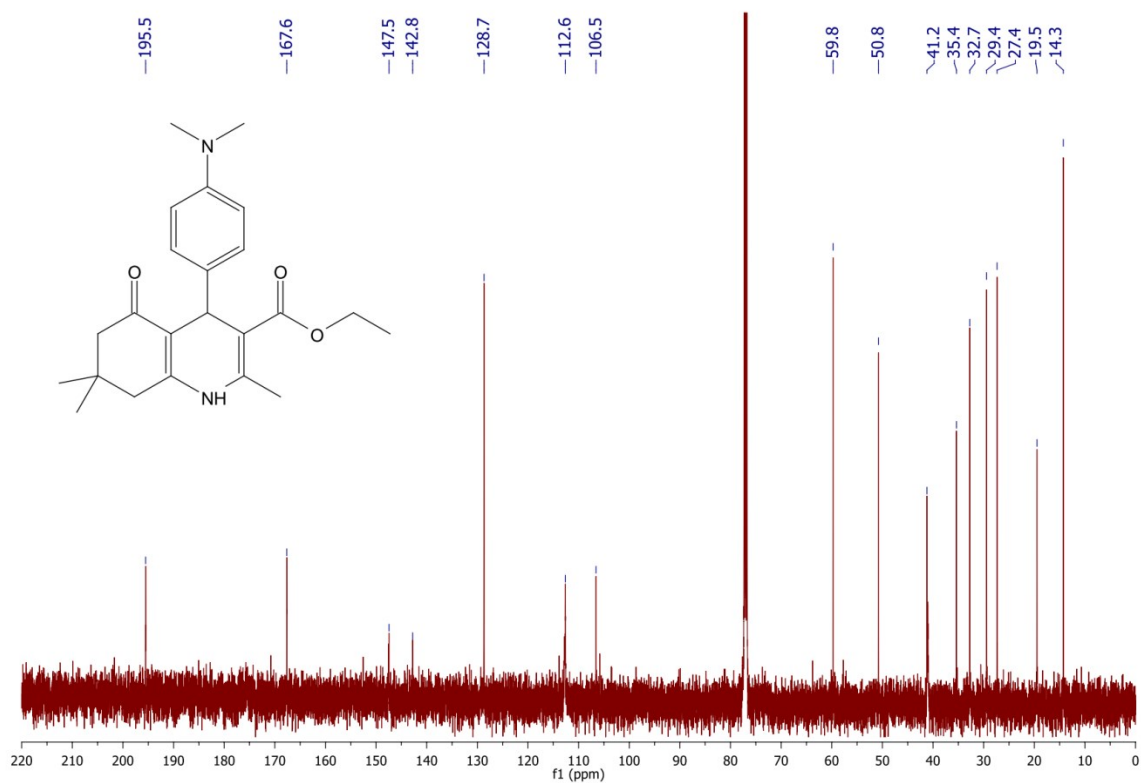

**<sup>1</sup>H and <sup>13</sup>C NMR spectroscopy of ethyl 4-(benzo[d][1,3]dioxol-5-yl)-2,7,7-trimethyl-5-oxo-1,4,5,6,7,8-hexahydroquinolin-3-carboxylate (12)**

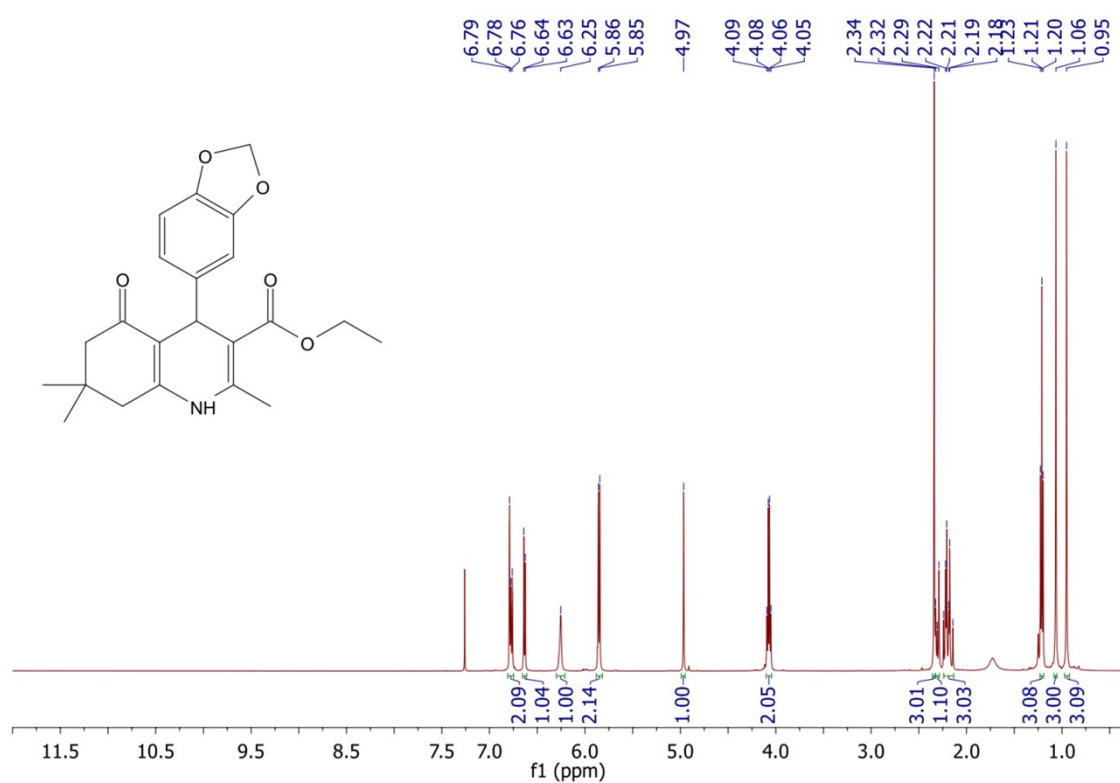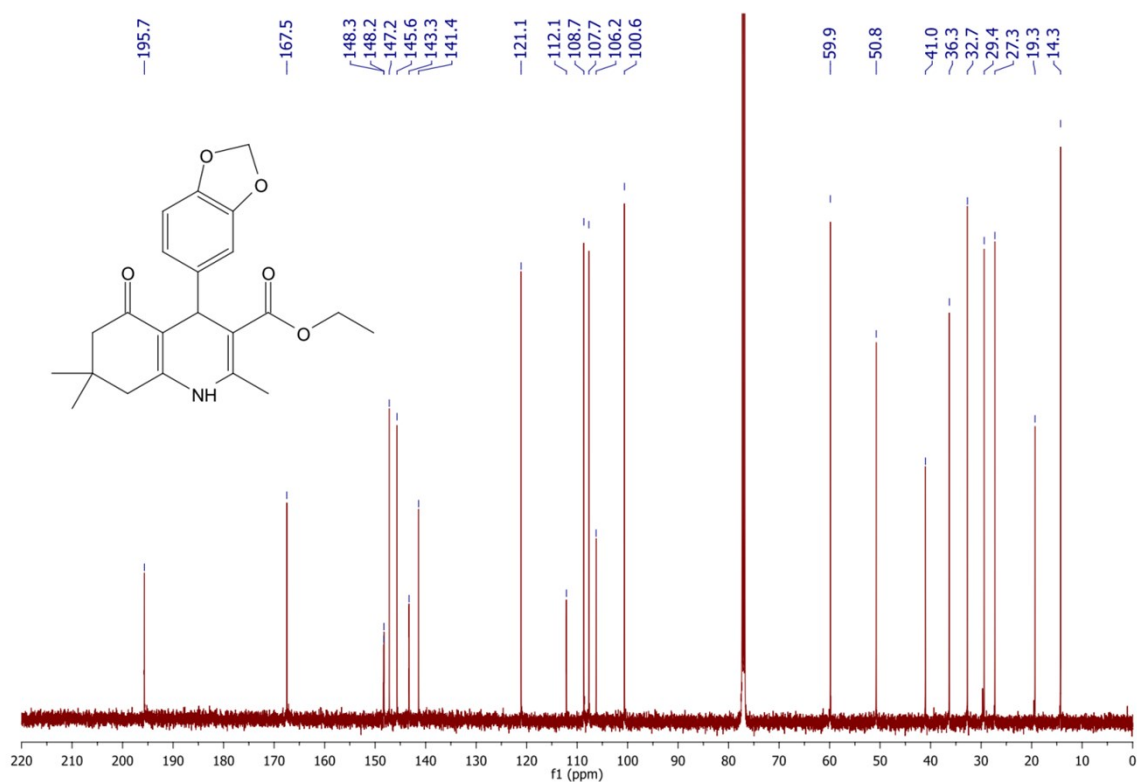

**$^1\text{H}$  and  $^{13}\text{C}$  NMR spectroscopy of ethyl 4-(furan-2-yl)-2,7,7-trimethyl-5-oxo-1,4,5,6,7,8-hexahydroquinoline-3-carboxylate (13)**

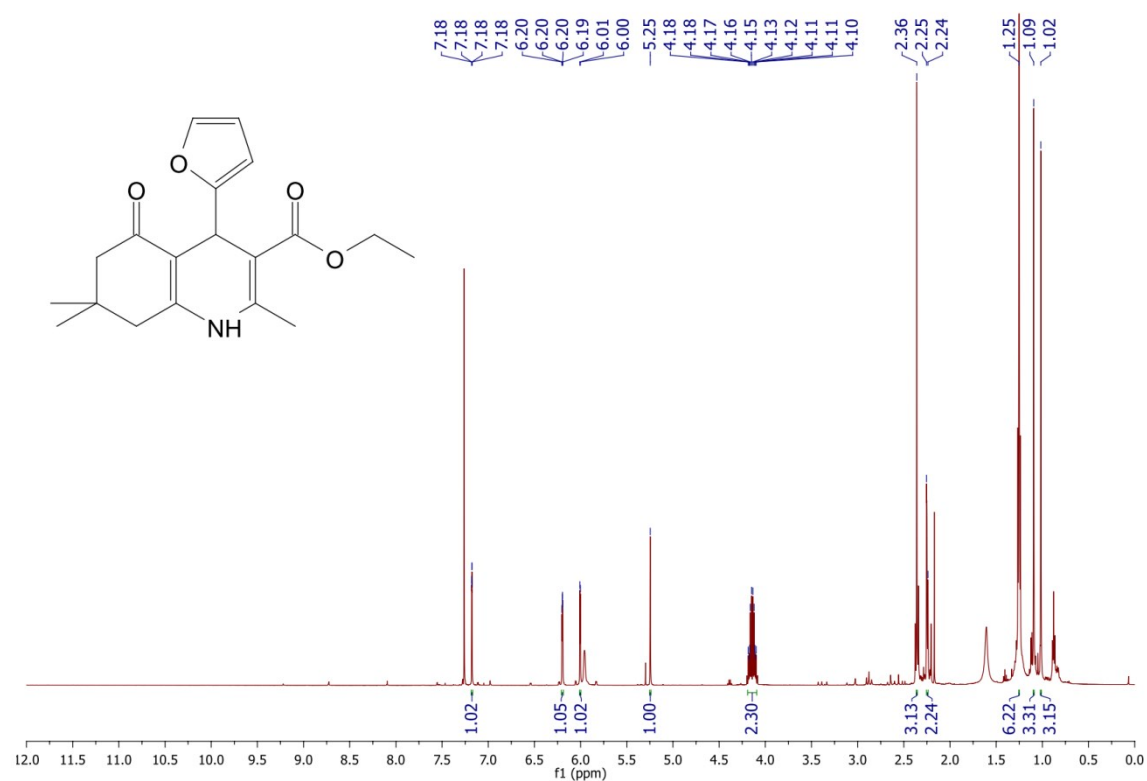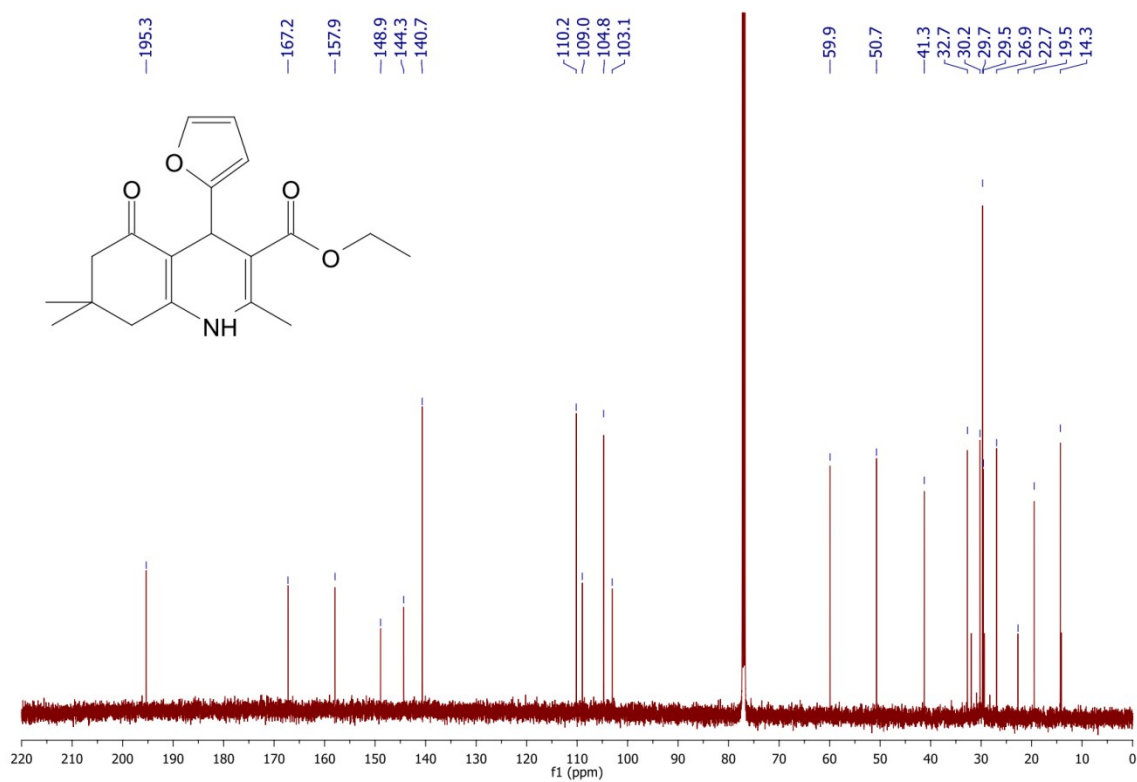



**$^1\text{H}$  and  $^{13}\text{C}$  NMR spectroscopy of ethyl 4-(5-bromofuran-2-yl)-2,7,7-trimethyl-5-oxo-1,4,5,6,7,8-hexahydroquinoline-3-carboxylate (14)**

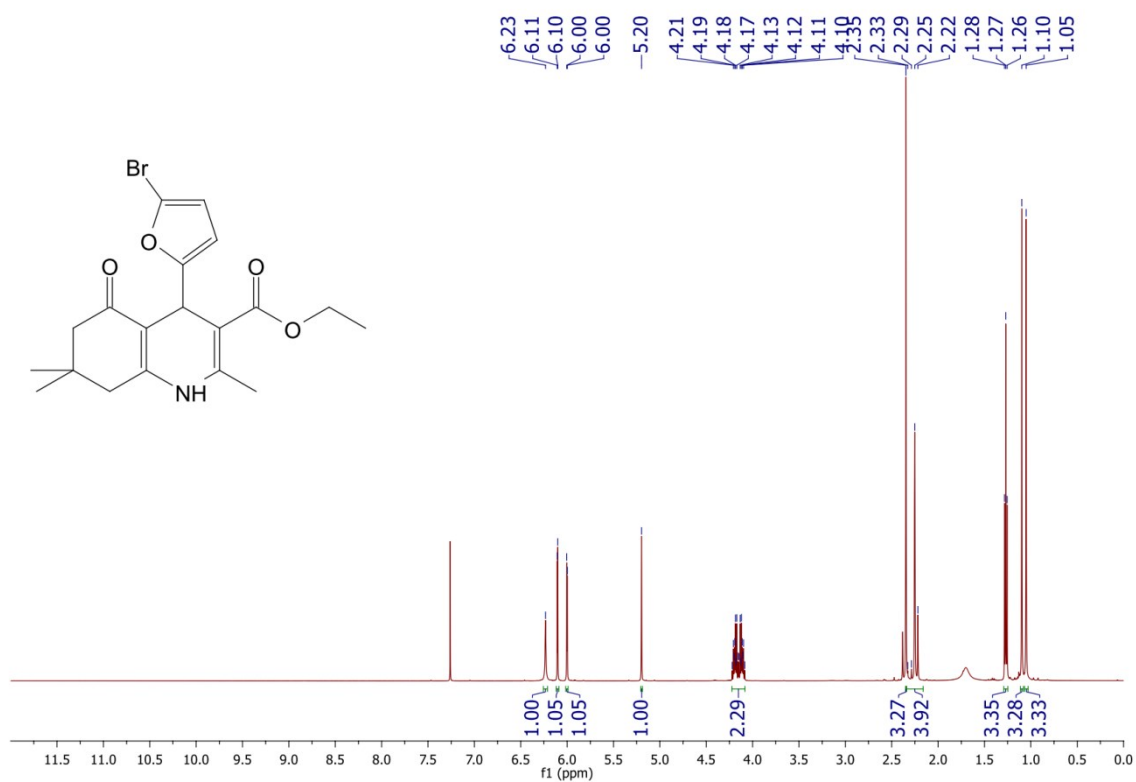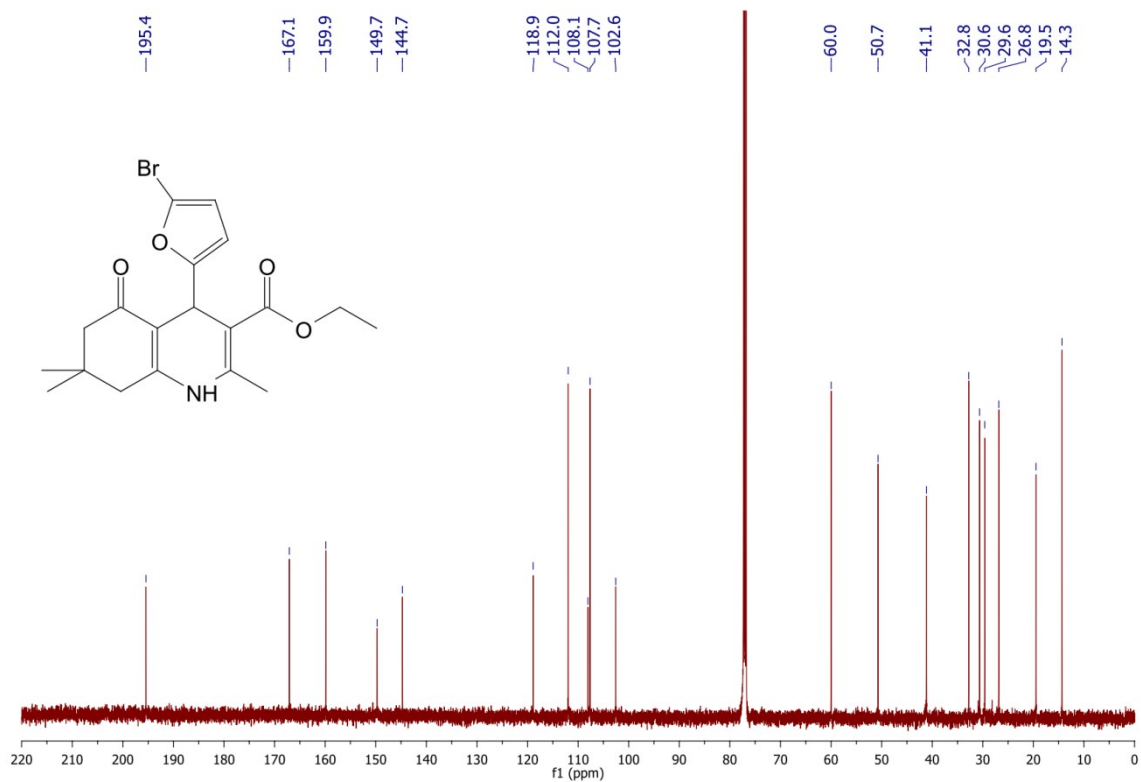

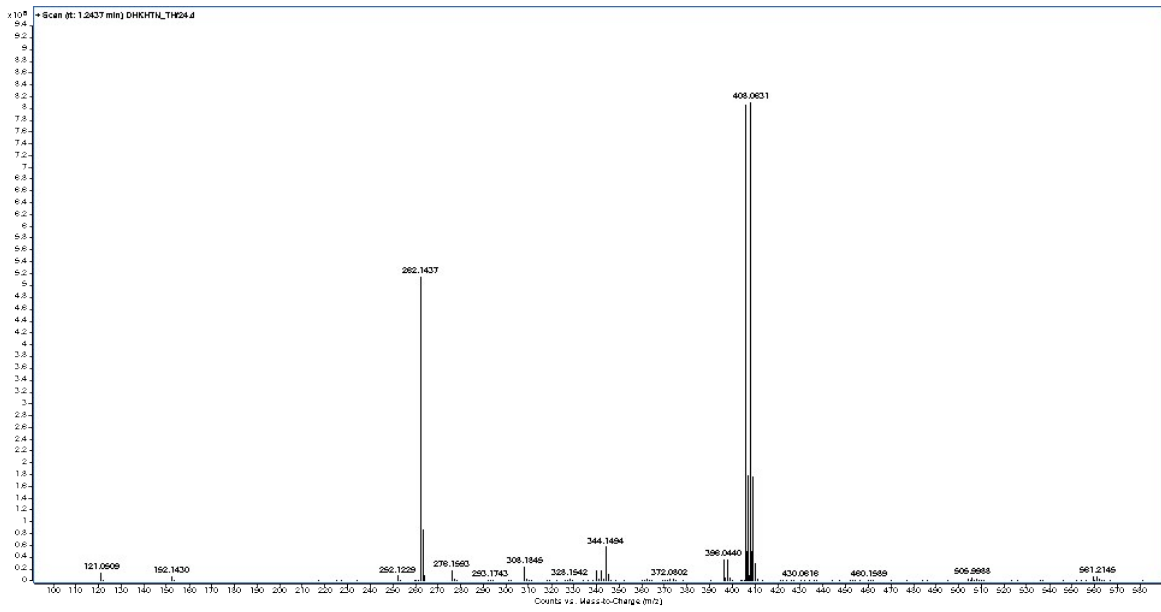

**$^1\text{H}$  and  $^{13}\text{C}$  NMR spectroscopy of ethyl 4-(5-chlorofuran-2-yl)-2,7,7-trimethyl-5-oxo-1,4,5,6,7,8-hexahydroquinoline-3-carboxylate (15)**

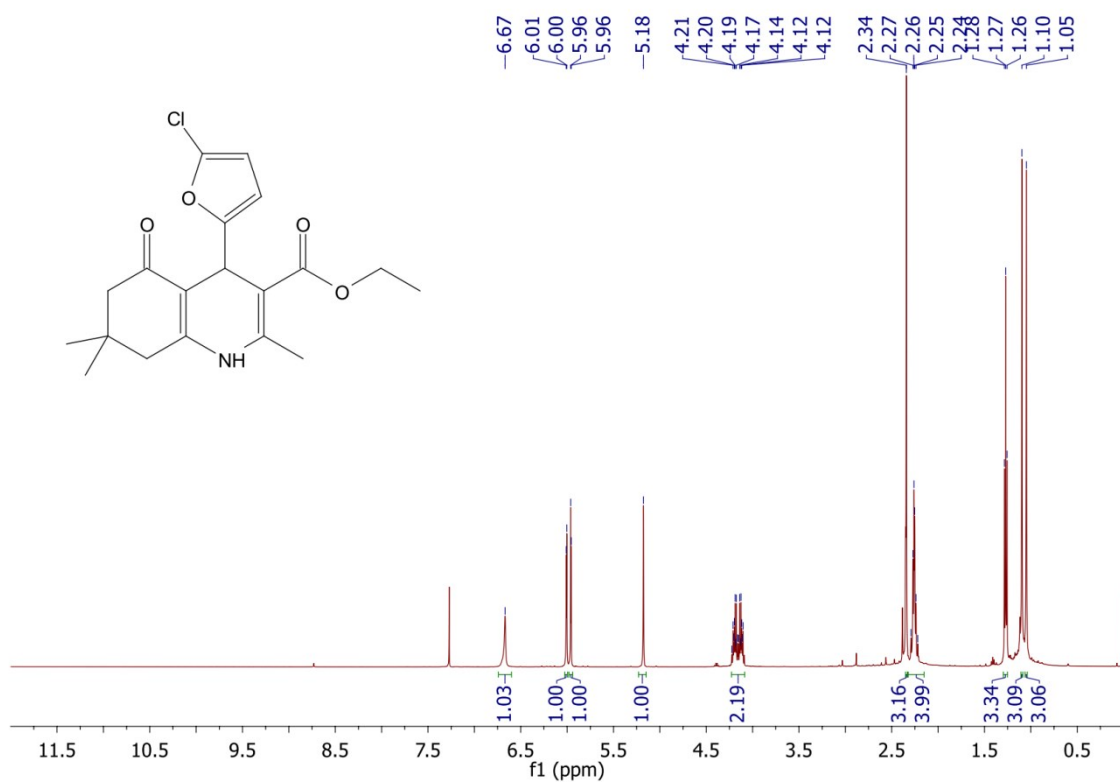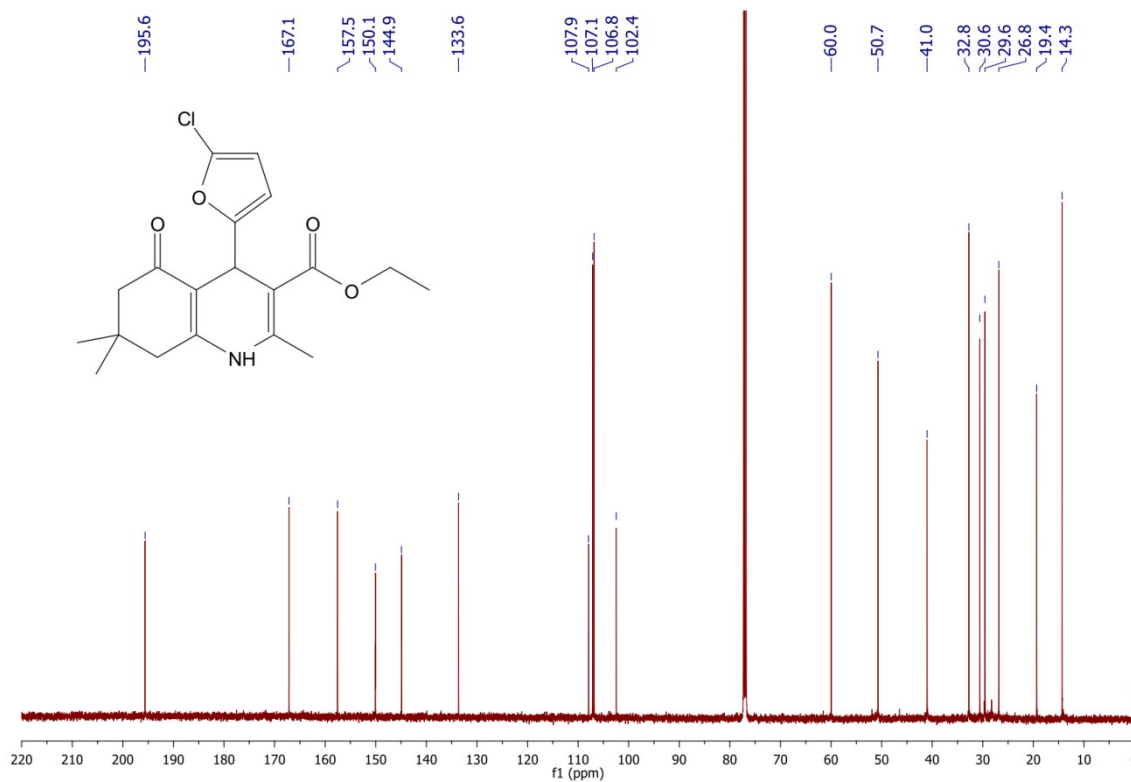

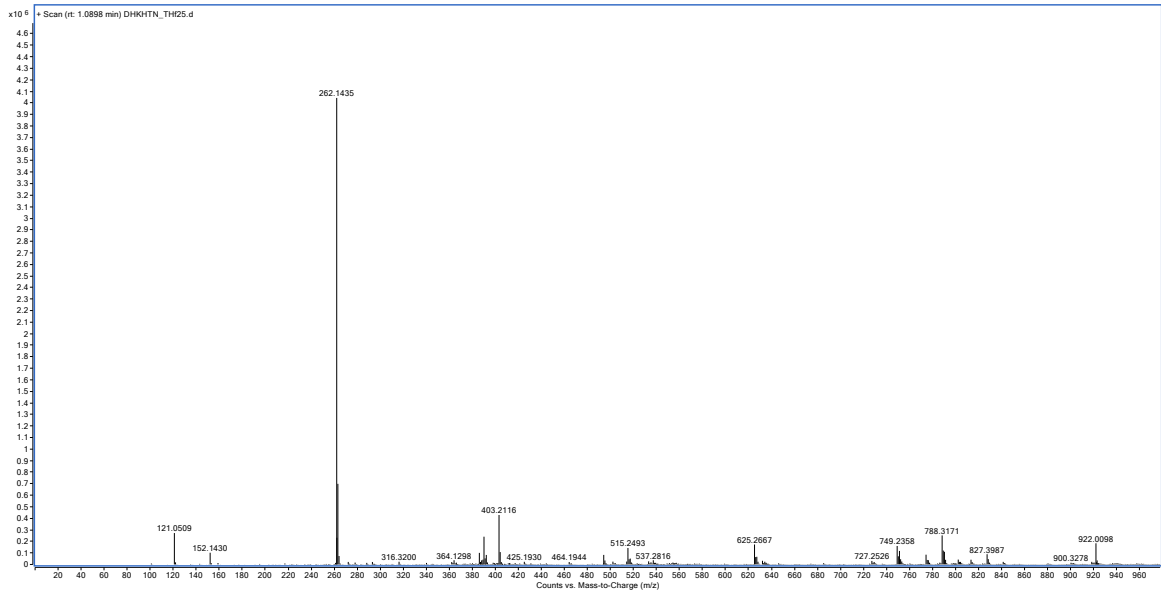

**$^1\text{H}$  and  $^{13}\text{C}$  NMR spectroscopy of ethyl 4-(5-(hydroxymethyl)furan-2-yl)-2,7,7-trimethyl-5-oxo-1,4,5,6,7,8-hexahydroquinoline-3-carboxylate (16)**

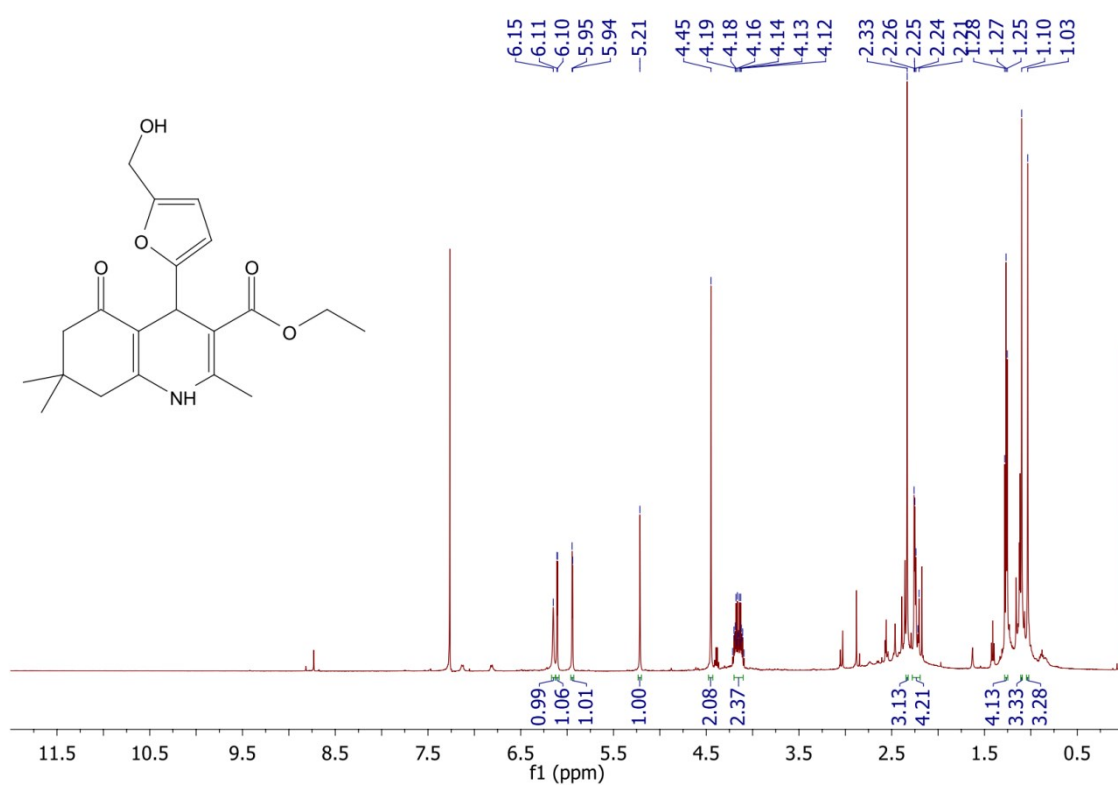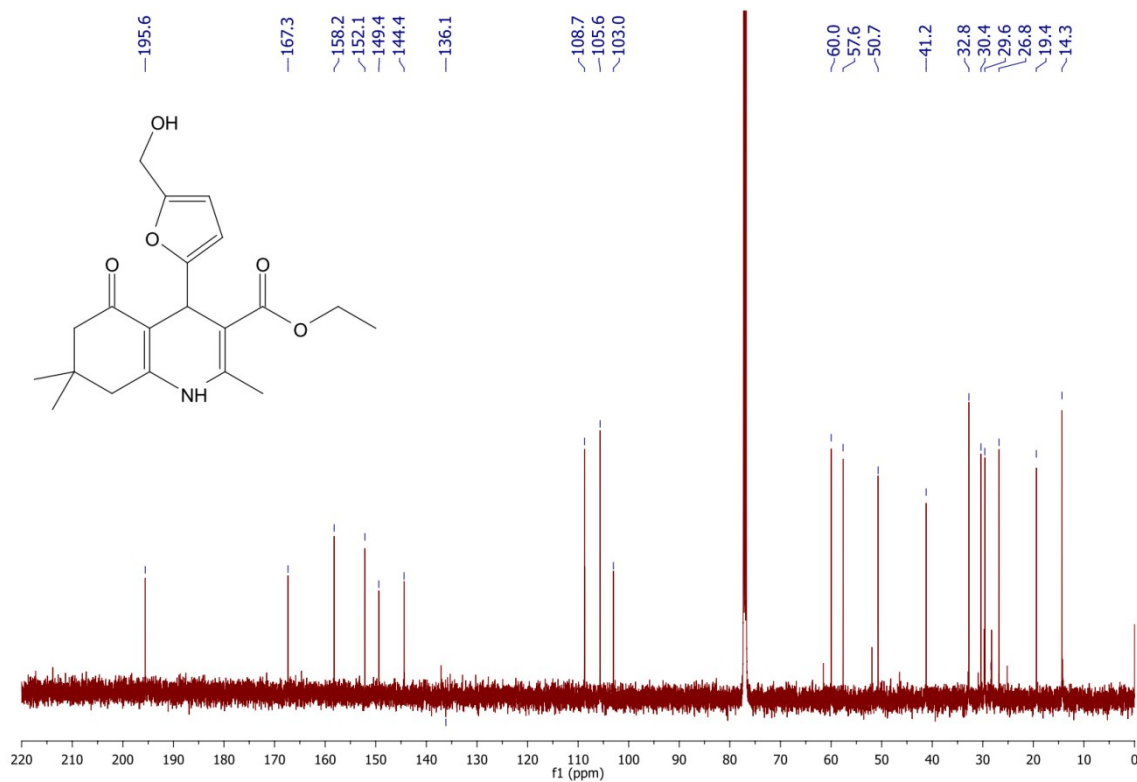

**<sup>1</sup>H and <sup>13</sup>C NMR spectroscopy of ethyl 4-(5-(4-chlorophenyl)furan-2-yl)-2,7,7-trimethyl-5-oxo-1,4,5,6,7,8-hexahydroquinoline-3-carboxylate (17)**

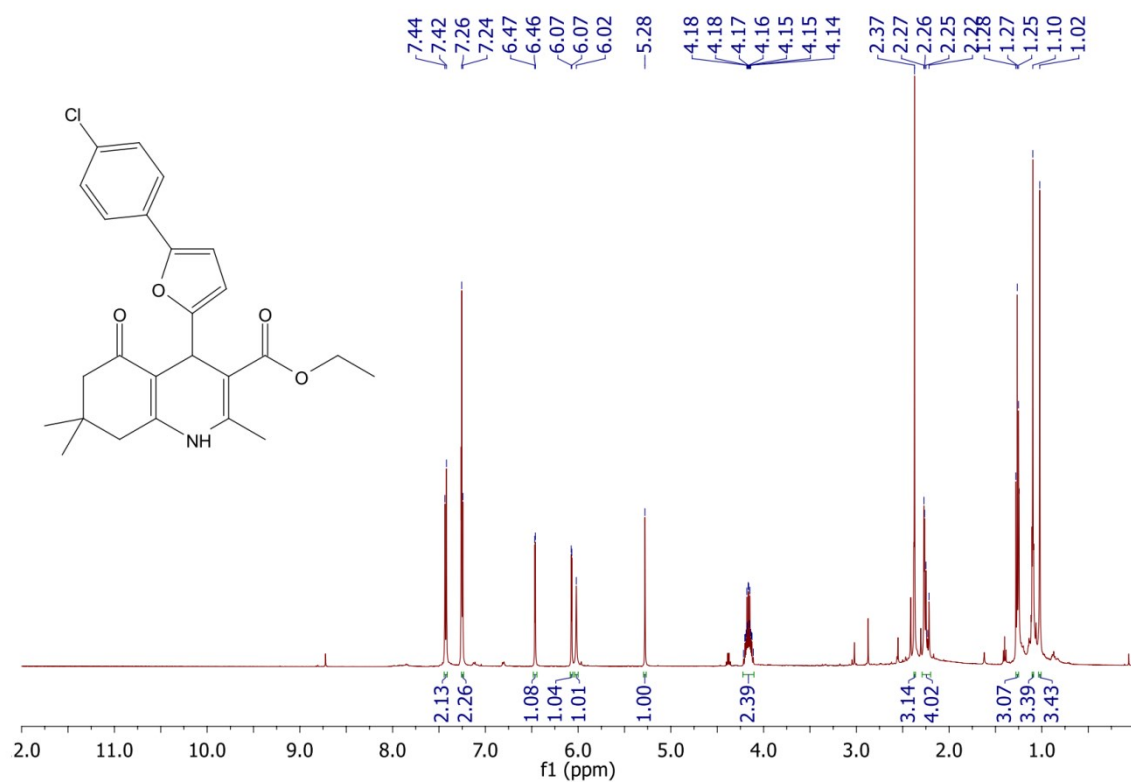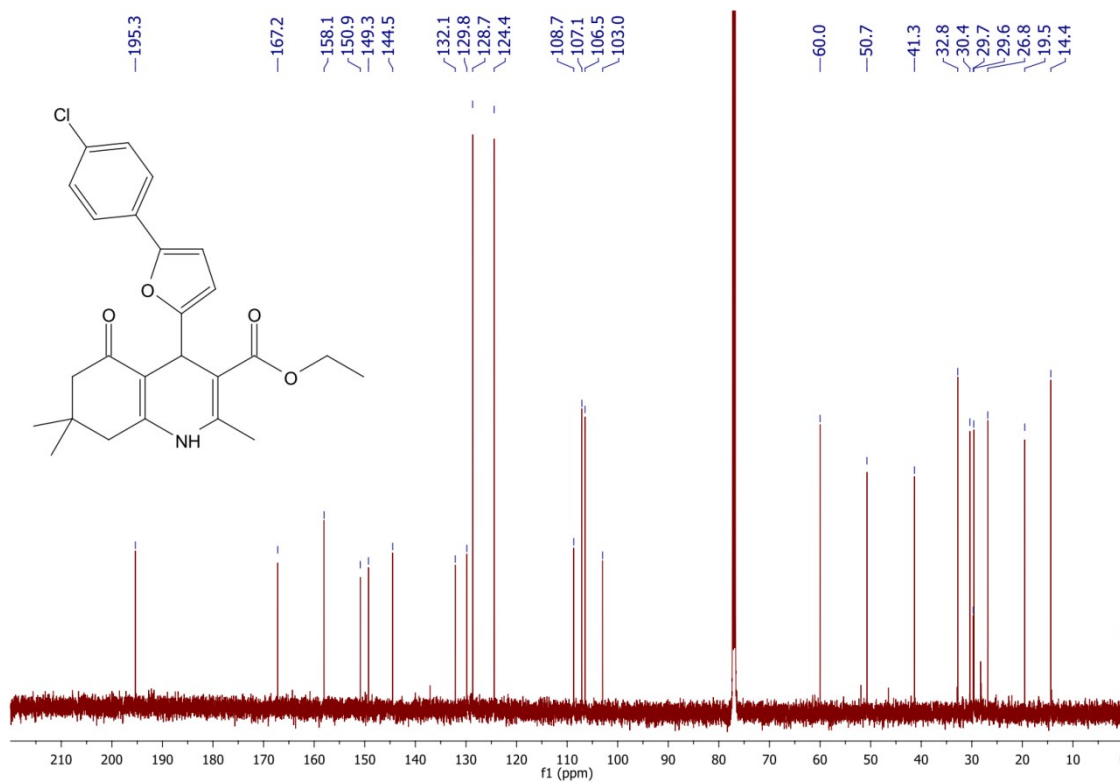

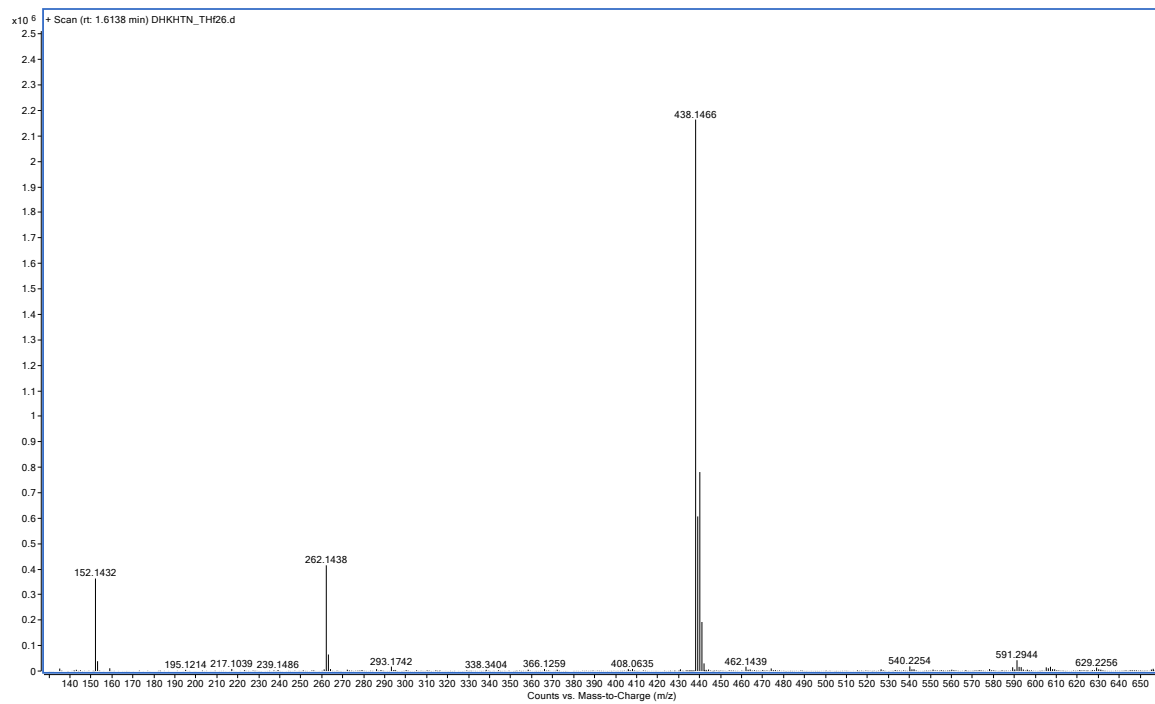

# <sup>1</sup>H and <sup>13</sup>C NMR spectroscopy of ethyl 4-(benzofuran-2-yl)-2,7,7-trimethyl-5-oxo-1,4,5,6,7,8-hexahydroquinoline-3-carboxylate (18)

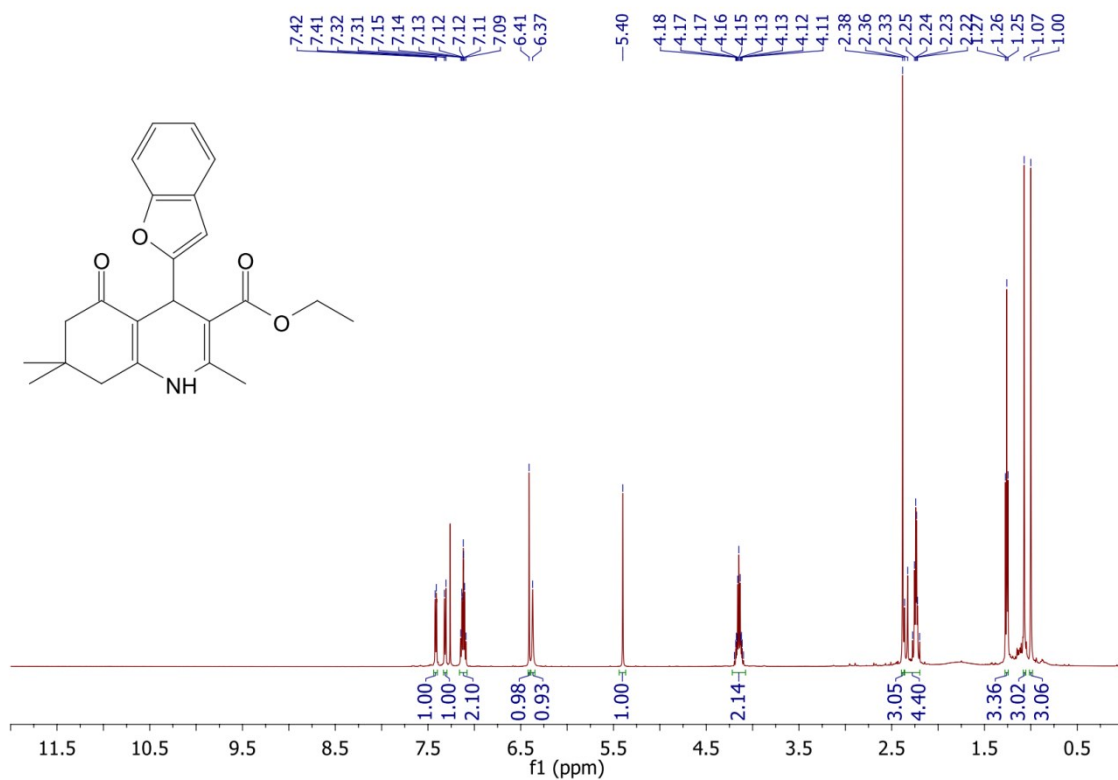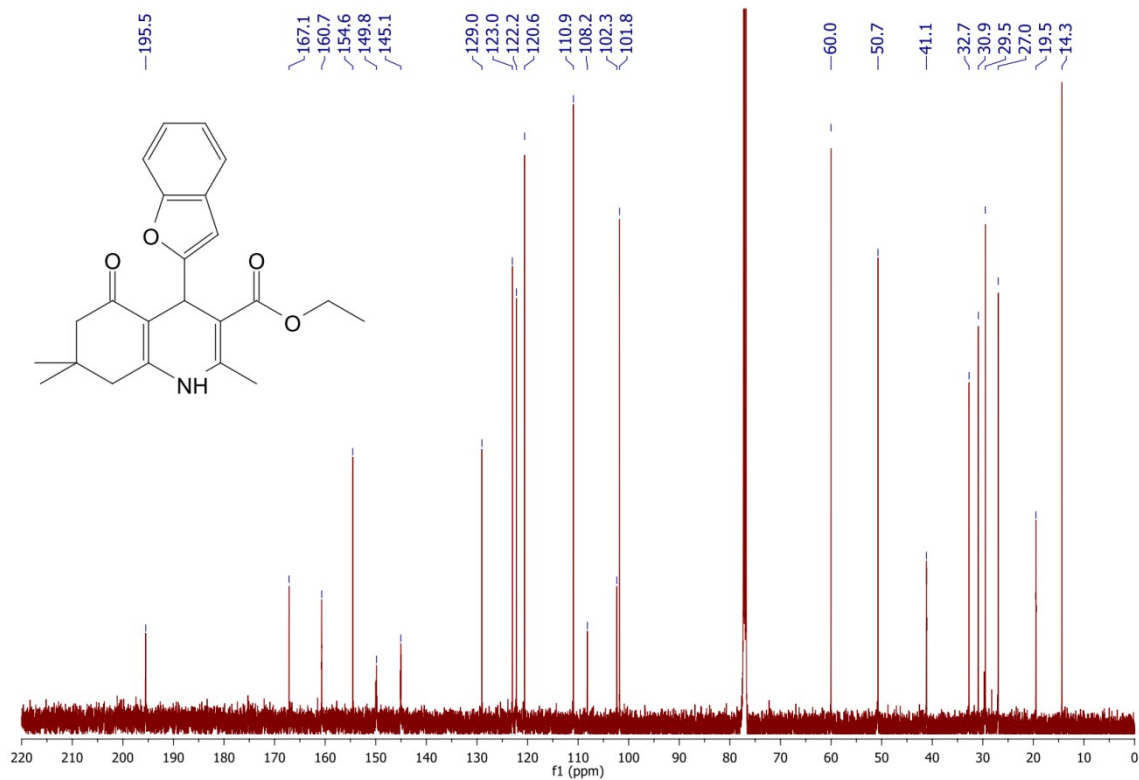



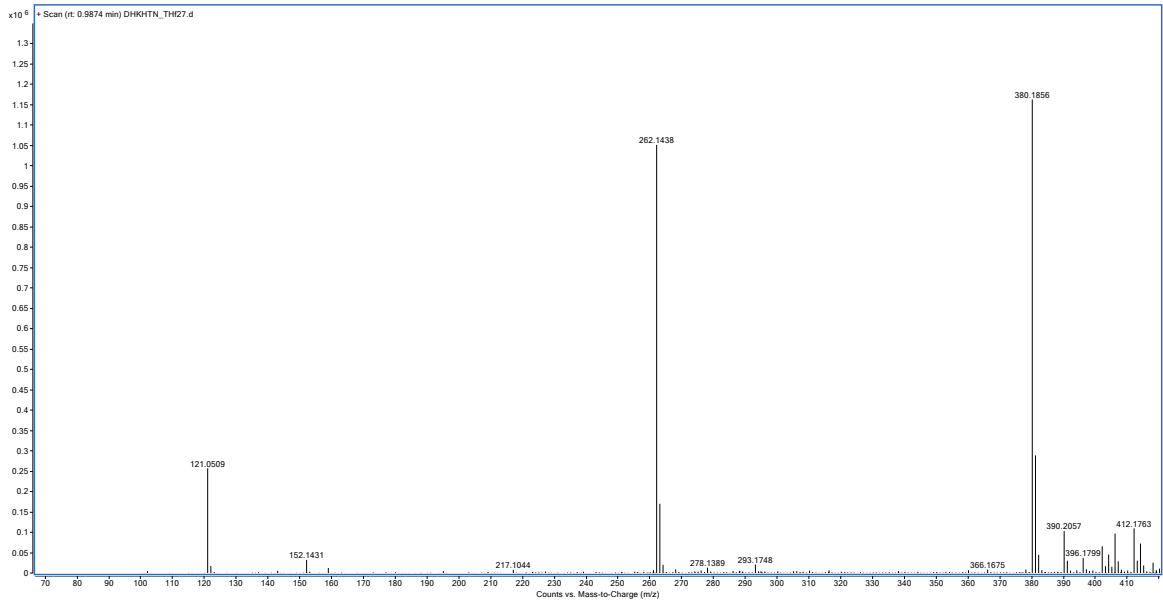

# <sup>1</sup>H and <sup>13</sup>C NMR spectroscopy of (1,3-diphenylprop-2-yn-1-yl)piperidine (19)

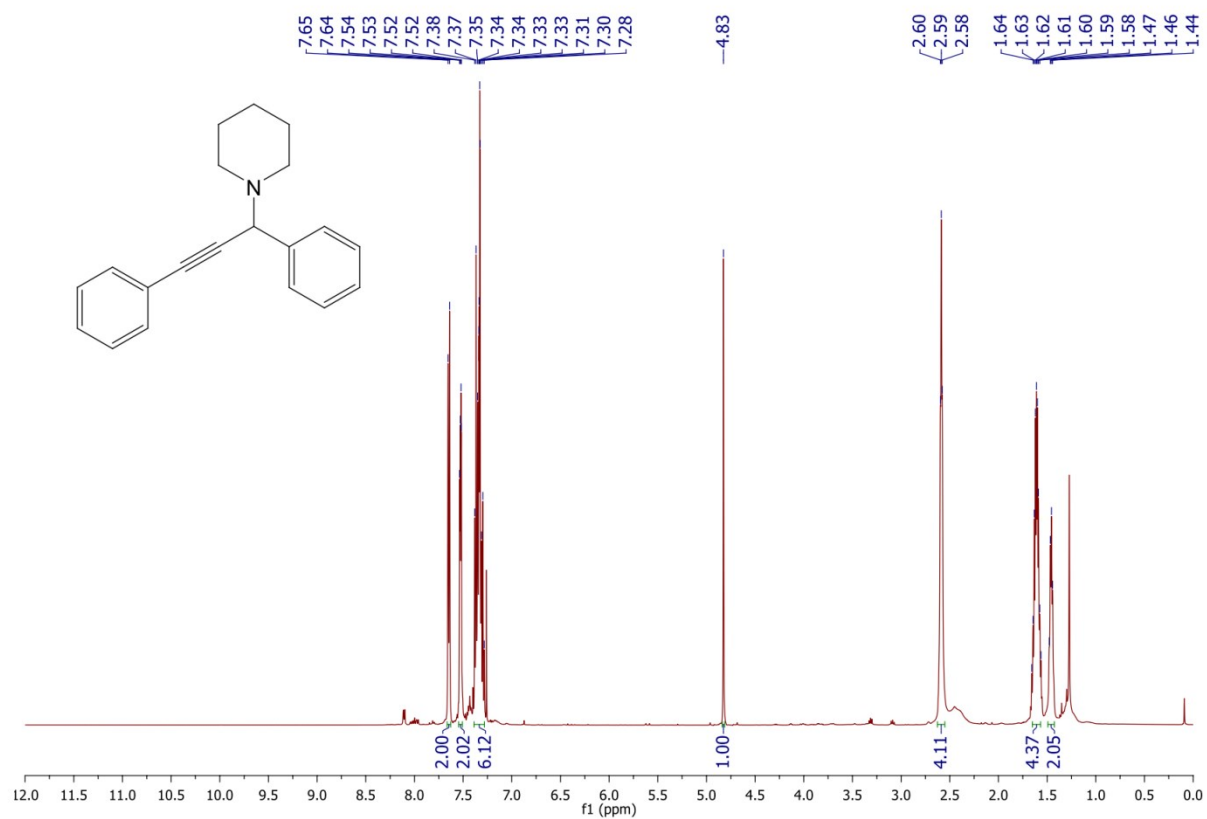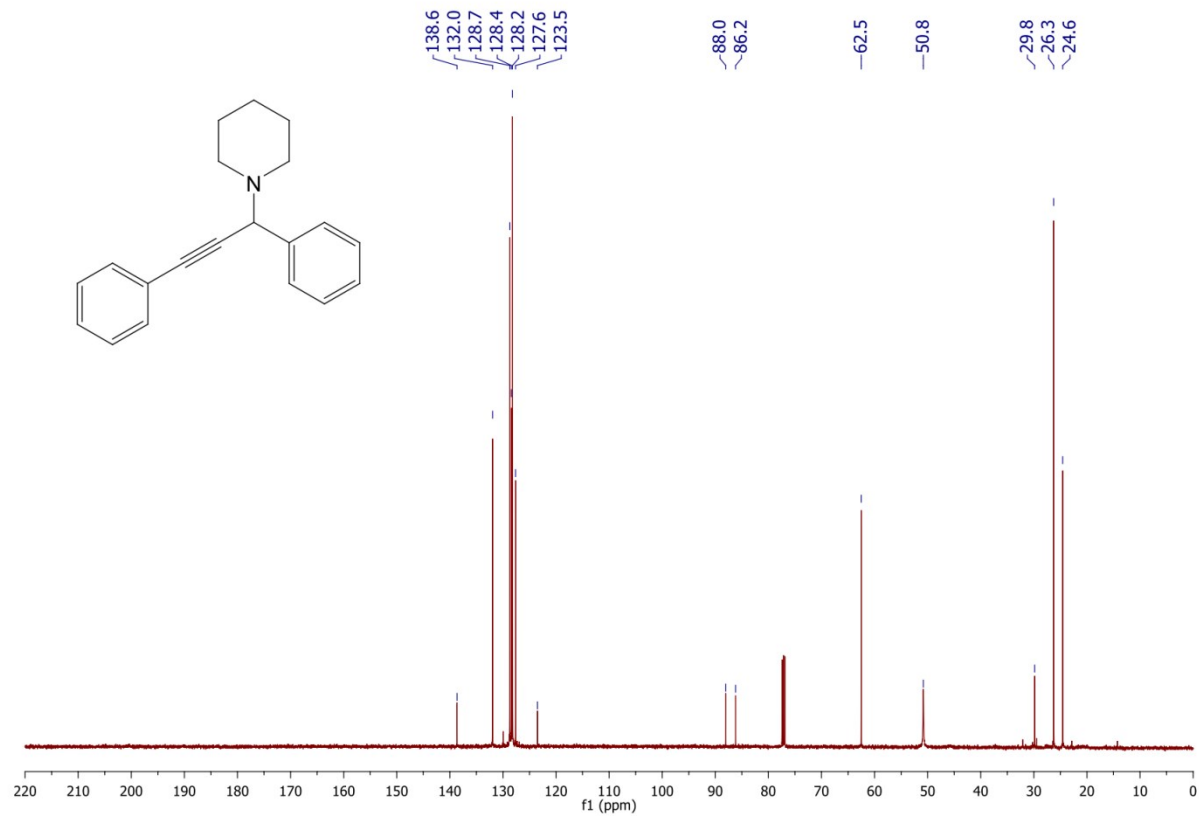

# <sup>1</sup>H and <sup>13</sup>C NMR spectroscopy of 1-(3-phenyl-1-(*o*-tolyl)prop-2-yn-1-yl)piperidine (20)

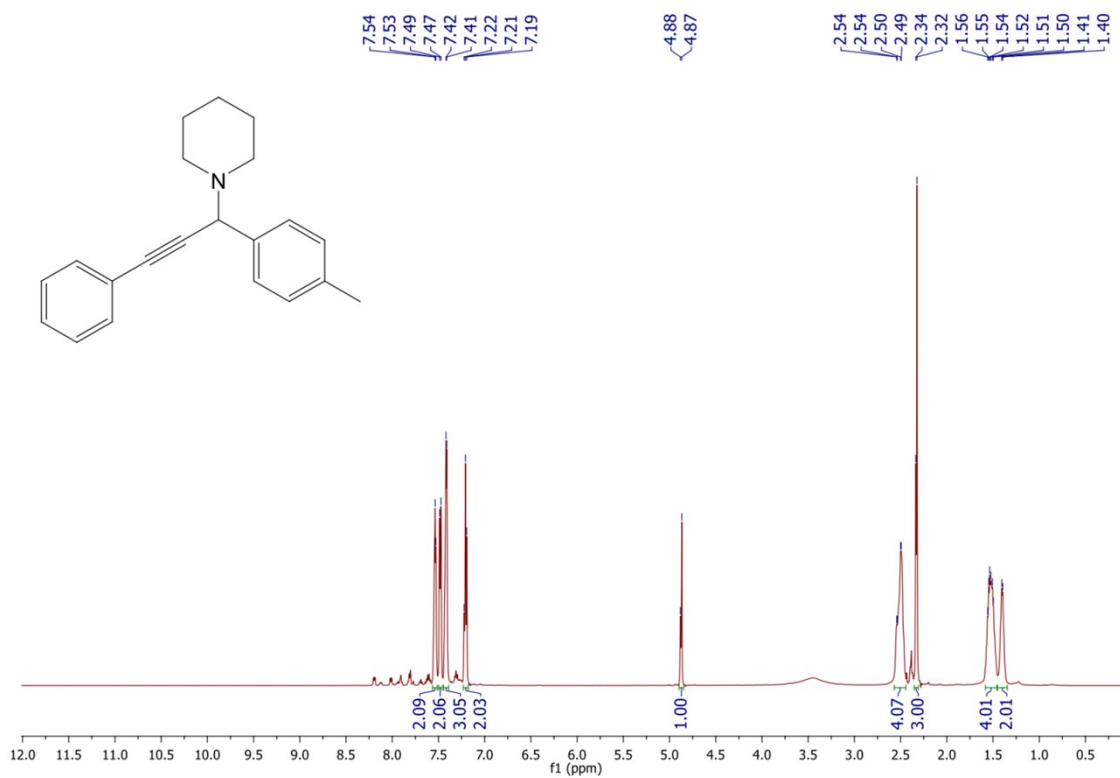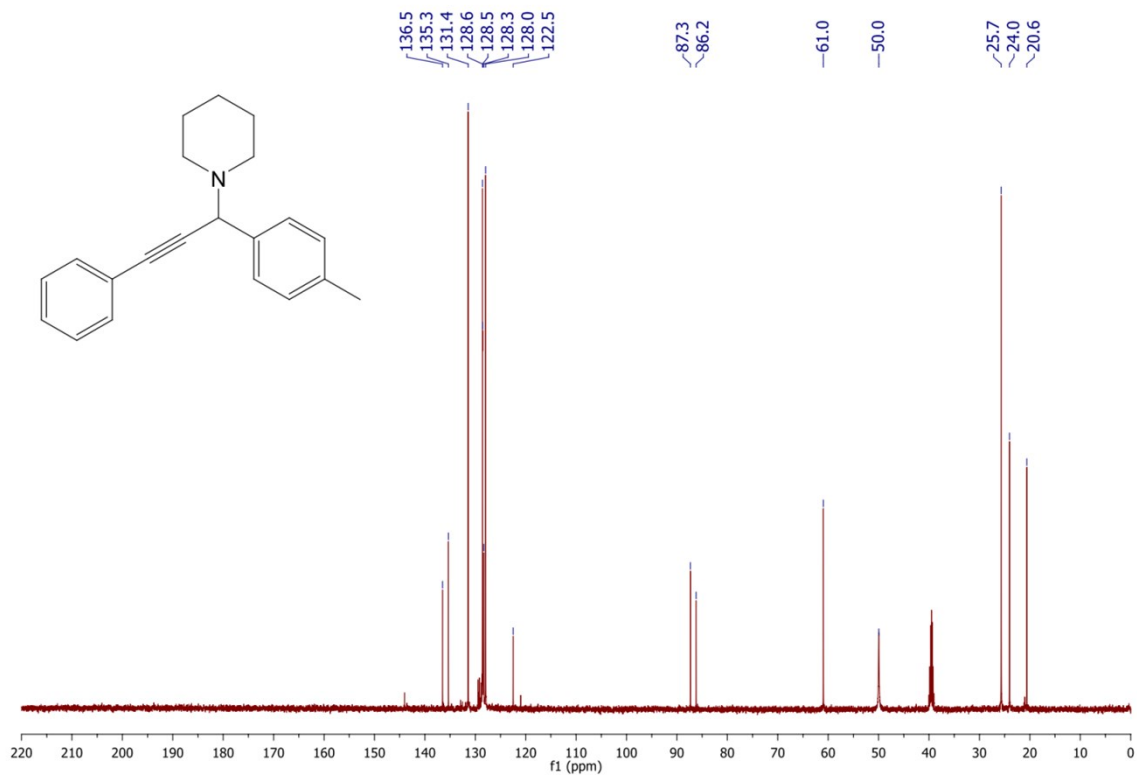

# <sup>1</sup>H and <sup>13</sup>C NMR spectroscopy of 1-(1-(4-(tert-butyl)phenyl)-3-phenylprop-2-yn-1-yl)piperidine (21)

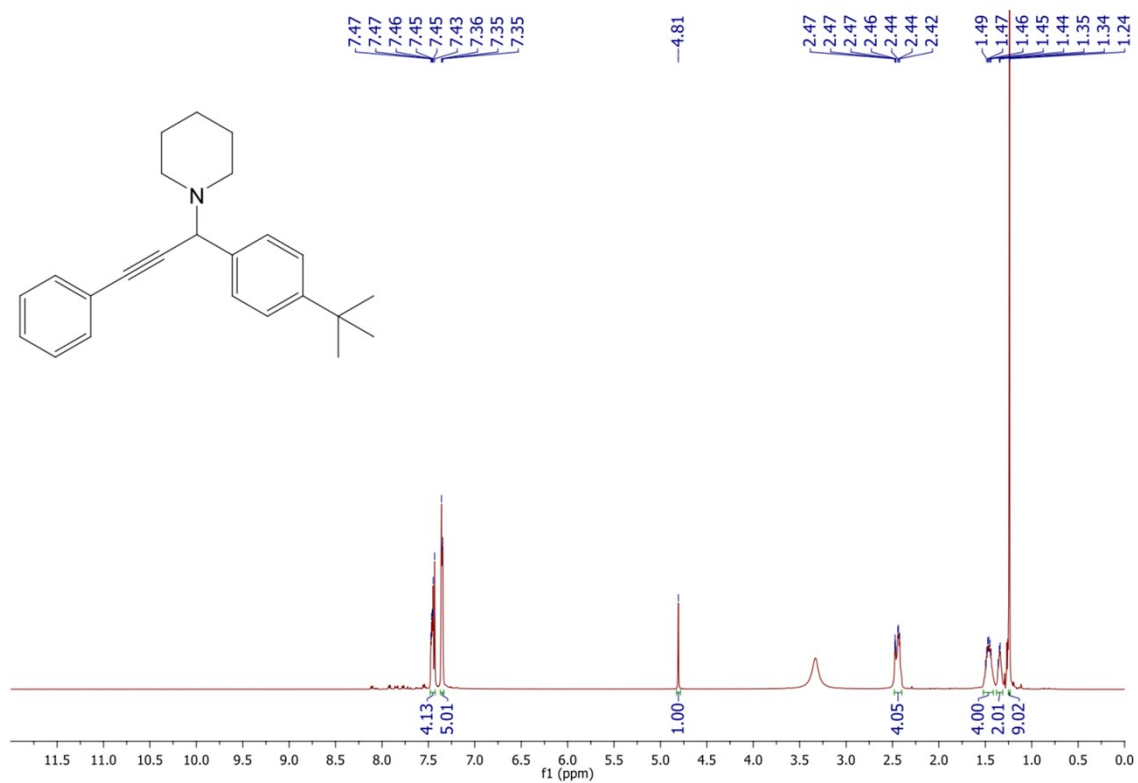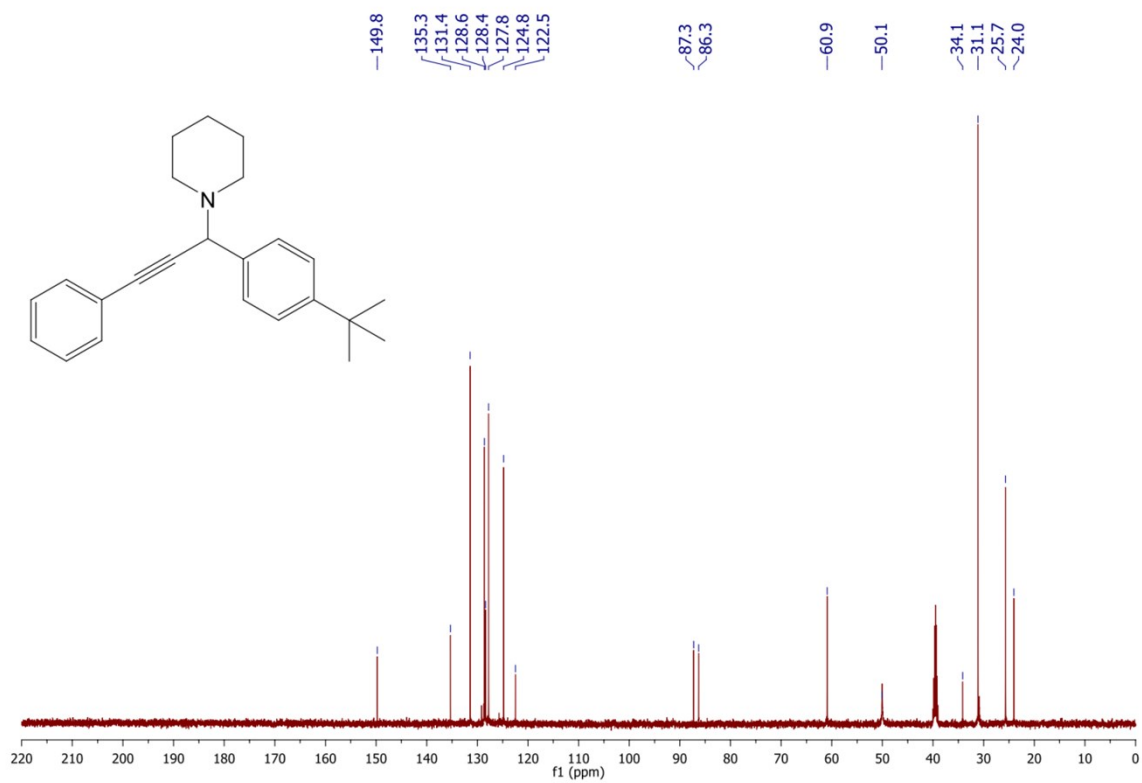

# <sup>1</sup>H and <sup>13</sup>C NMR spectroscopy of 1-(1-(4-chlorophenyl)-3-phenylprop-2-yn-1-yl)piperidine (22)

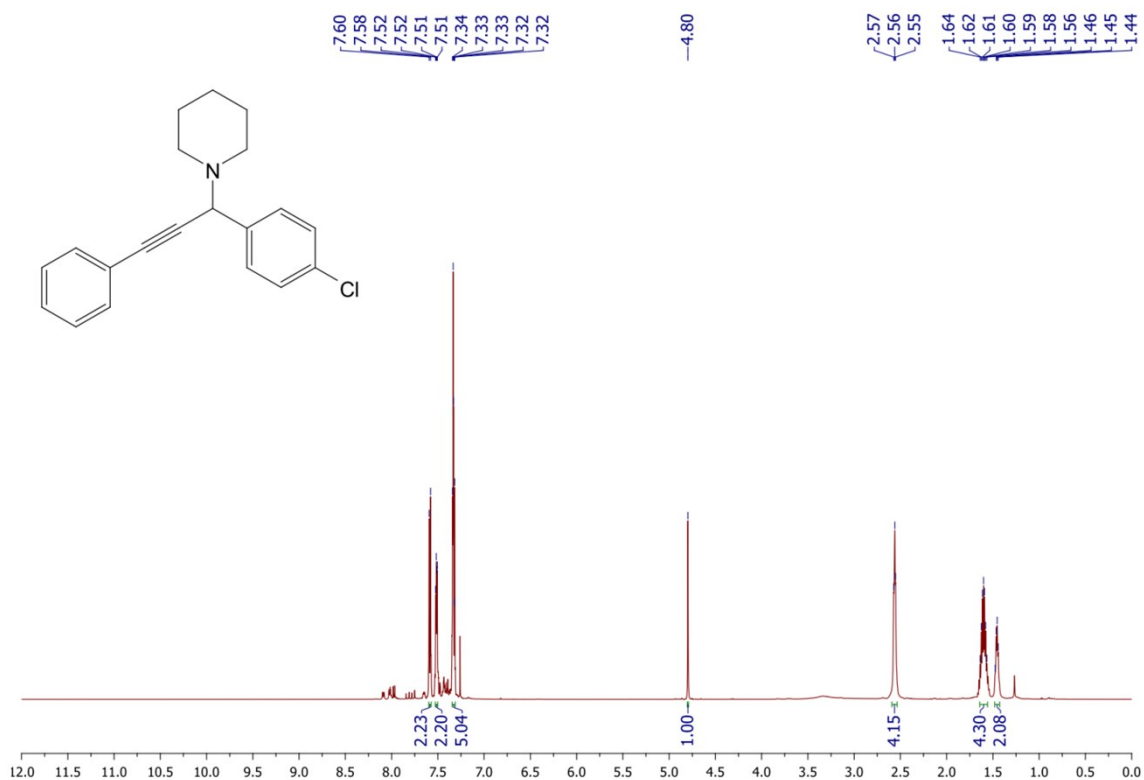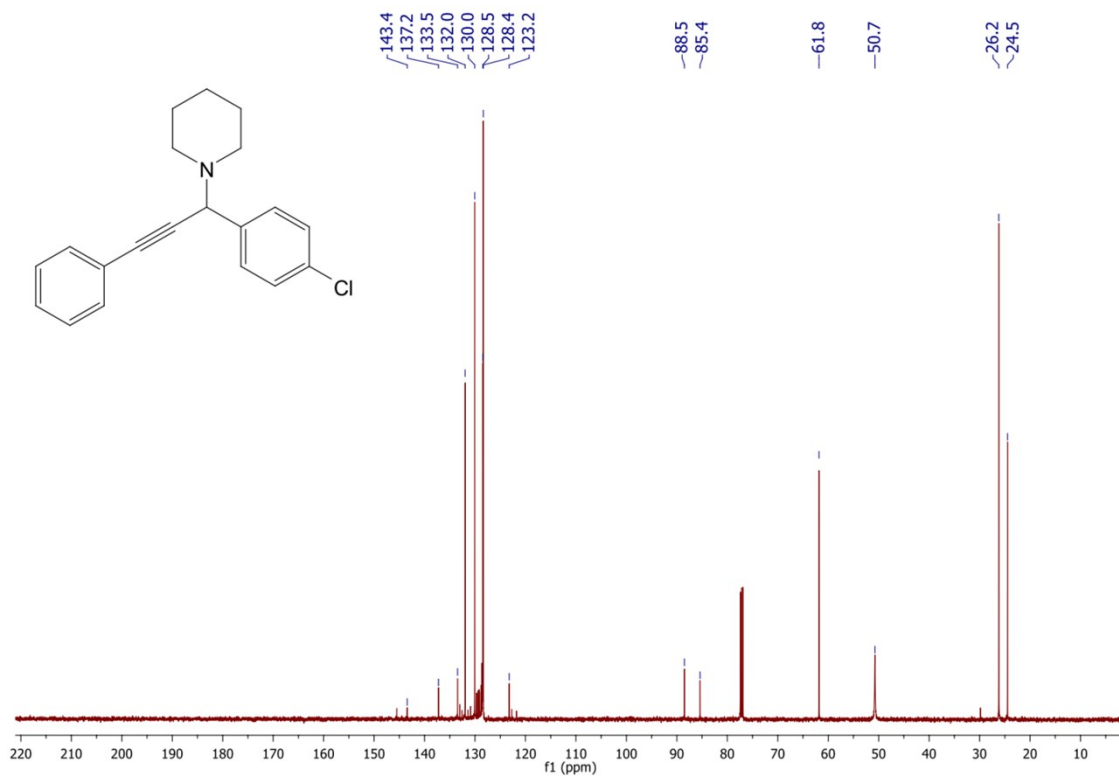

# <sup>1</sup>H and <sup>13</sup>C NMR spectroscopy of 1-(1-(4-fluorophenyl)-3-phenylprop-2-yn-1-yl)piperidine (23)

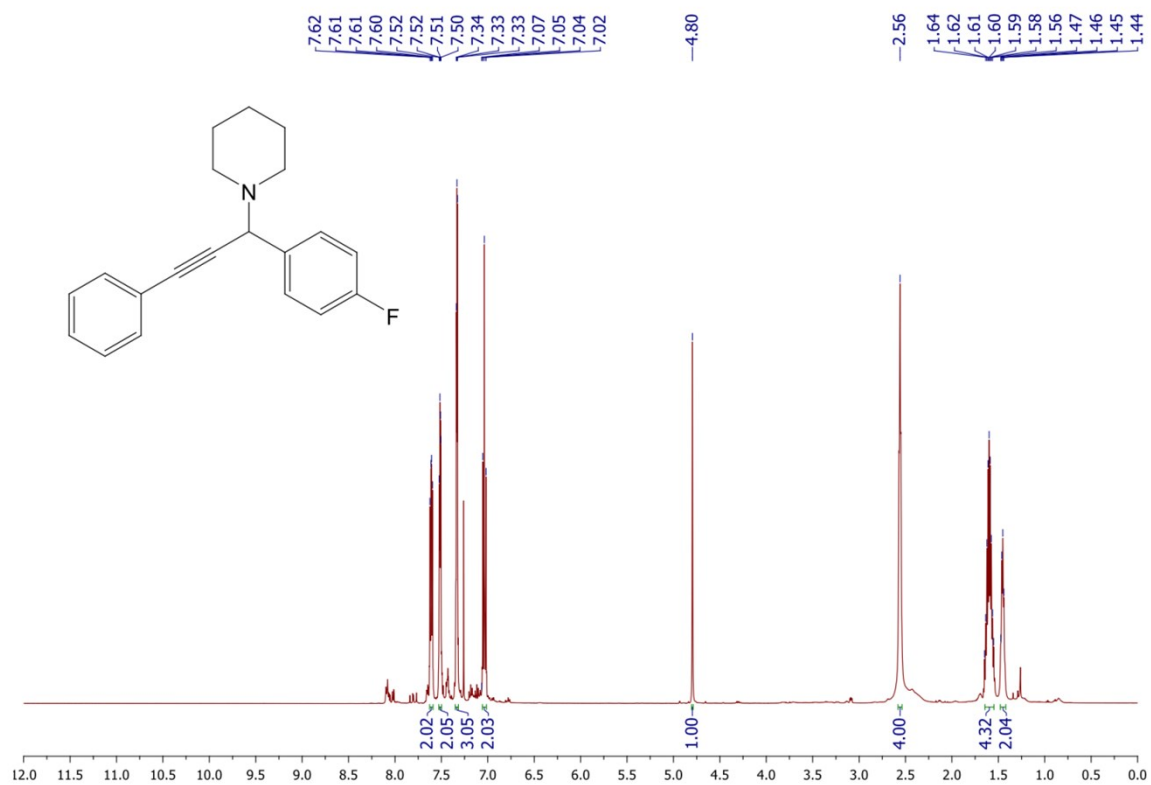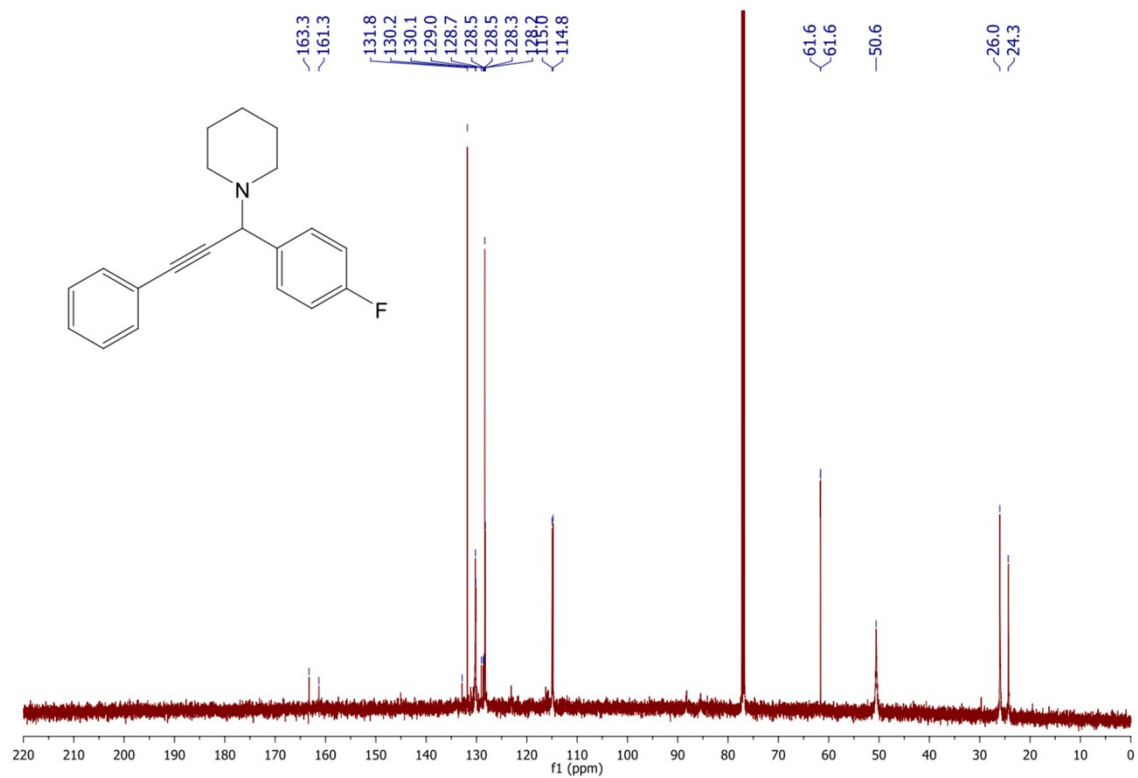

# <sup>1</sup>H NMR spectroscopy of ethyl 1-(1-(2-hydroxyphenyl)-3-phenylprop-2-yn-1-yl)piperidine

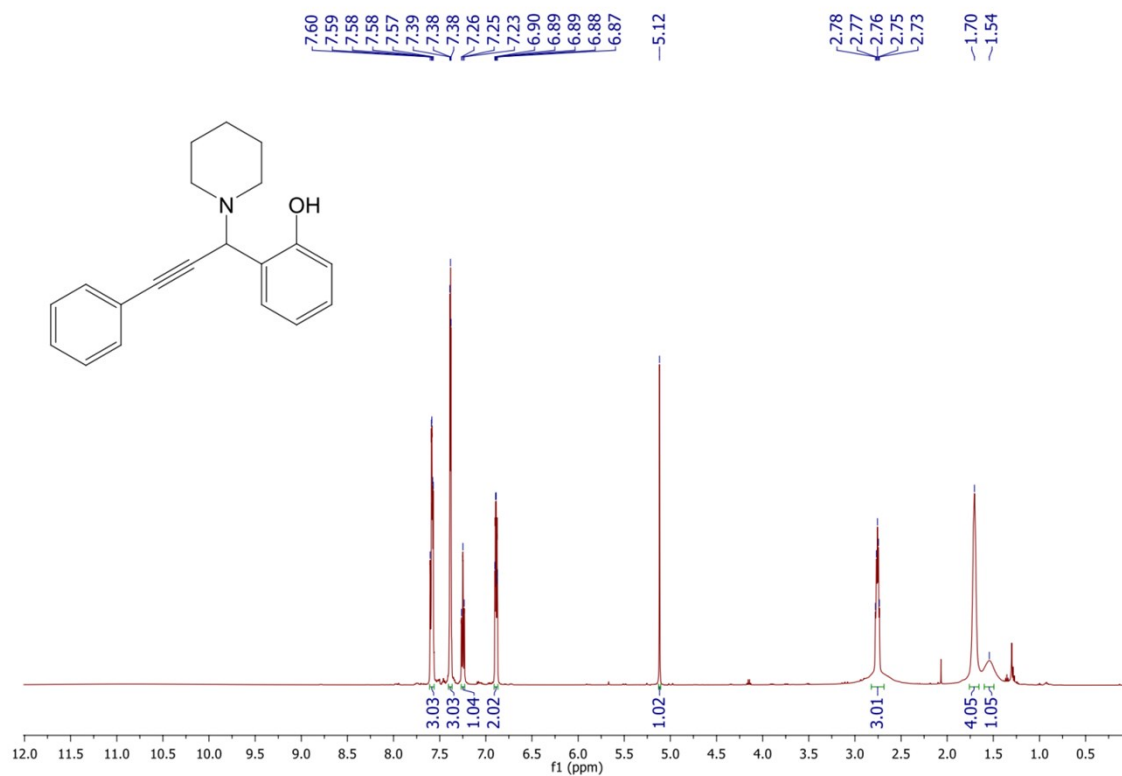

# <sup>1</sup>H and <sup>13</sup>C NMR spectroscopy of ethyl 1-(1-(furan-2-yl)-3-phenylprop-2-in-1-yl)piperidine

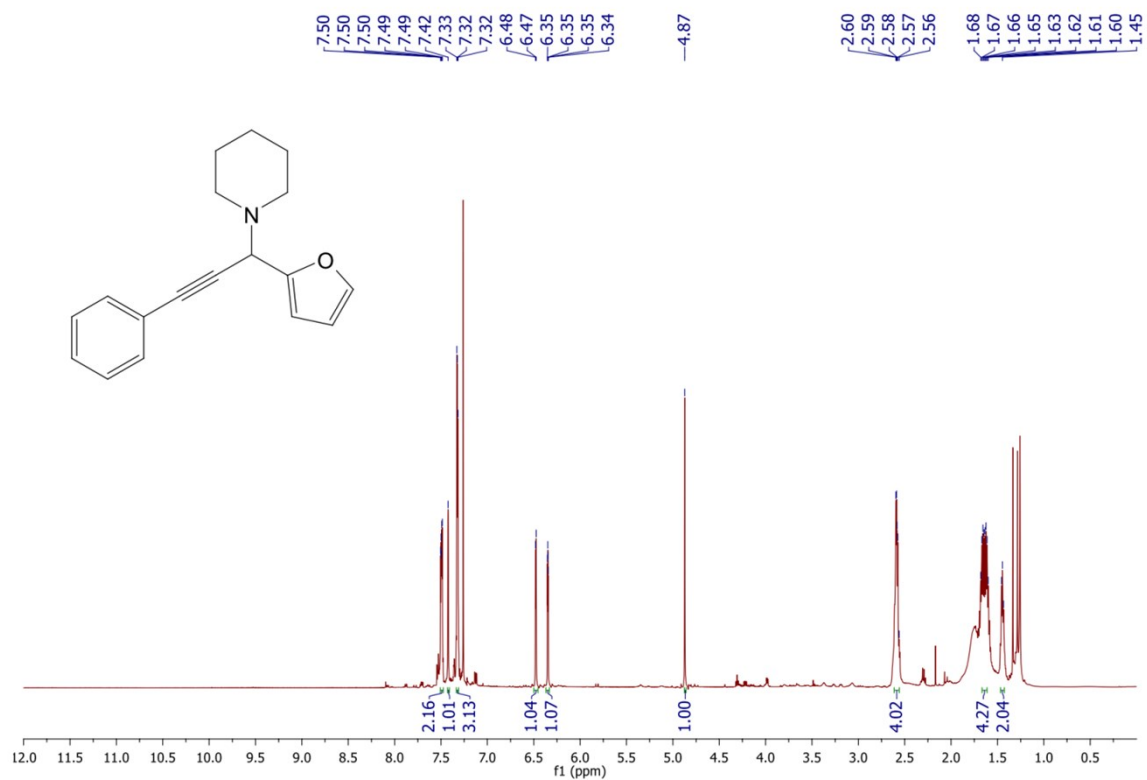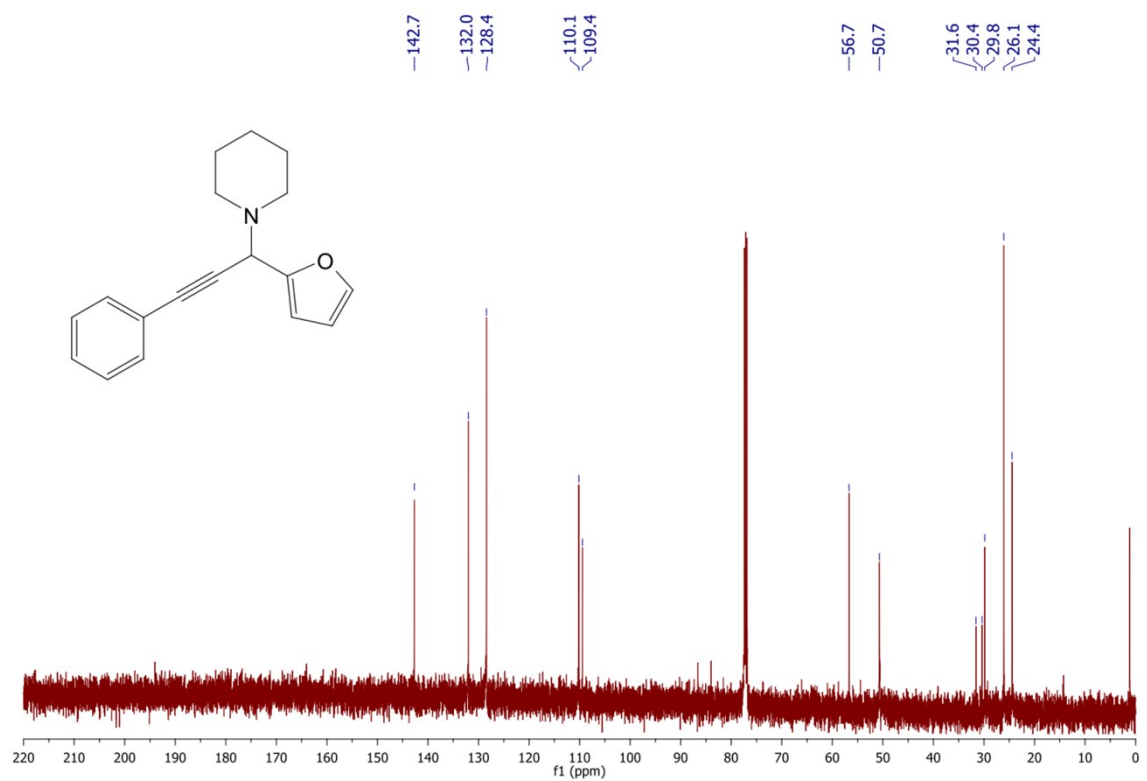



# <sup>1</sup>H NMR spectroscopy of ethyl 4-(3-phenyl-1-(piperidine-1-yl)prop-2-yn-1-yl)pyridine

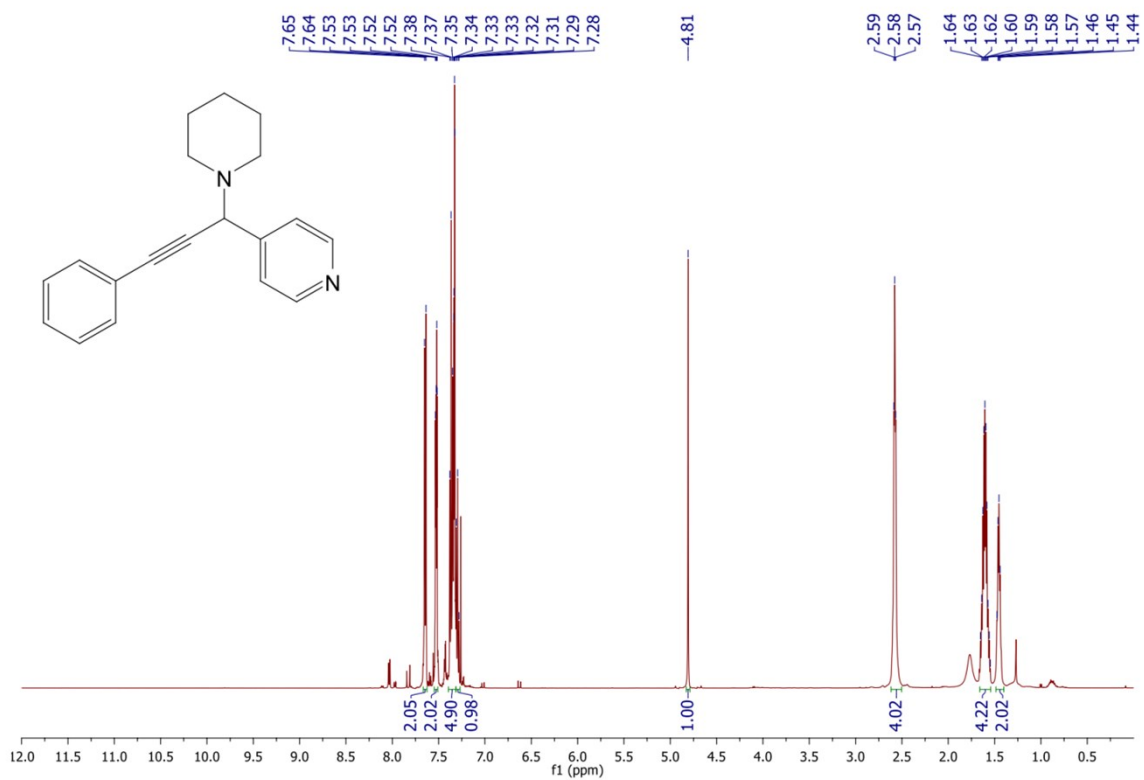

## Section S6. References

1. H. T. Nguyen, N.-P. Thi Le, D.-K. Nguyen Chau and P. H. Tran, *RSC Adv.*, 2018, **8**, 35681-35688.
2. T. Demirci, B. Çelik, Y. Yıldız, S. Eriş, M. Arslan, F. Sen and B. Kilbas, *RSC Adv.*, 2016, **6**, 76948-76956.
3. M. Nasr-Esfahani, S. J. Hoseini, M. Montazerzohori, R. Mehrabi and H. Nasrabadi, *J. Mol. Catal. A: Chem.*, 2014, **382**, 99-105.
4. K. K. Pasunooti, C. Nixon Jensen, H. Chai, M. L. Leow, D.-W. Zhang and X.-W. Liu, *J. Comb. Chem.*, 2010, **12**, 577-581.
5. P. Mayurachayakul, W. Pluempanupat, C. Srisuwannaket and O. Chantarasriwong, *RSC Adv.*, 2017, **7**, 56764-56770.
6. B. C. P. Sujan Mondal, Asim Bhaumik, *ChemCatChem*, 2017, **9**, 1469–1475.
7. M. Hong, C. Cai and W.-B. Yi, *J. Fluorine Chem.*, 2010, **131**, 111-114.
8. N. Taheri, F. Heidarizadeh and A. Kiasat, *J. Magn. Magn. Mater.*, 2017, **428**, 481-487.
9. M. Abdollahi-Alibeik and A. Rezaeipoor-Anari, *J. Magn. Magn. Mater.*, 2016, **398**, 205-214.
10. G. B. Dharma Rao, S. Nagakalyan and G. K. Prasad, *RSC Adv.*, 2017, **7**, 3611-3616.
11. A. Kumar and R. A. Maurya, *Tetrahedron*, 2007, **63**, 1946-1952.
12. S.-J. Ji, Z.-Q. Jiang, J. Lu and T.-P. Loh, *Synlett*, 2004, **2004**, 0831-0835.
13. L.-M. Wang, J. Sheng, L. Zhang, J.-W. Han, Z.-Y. Fan, H. Tian and C.-T. Qian, *Tetrahedron*, 2005, **61**, 1539-1543.
14. M. Milen, G. Györke, A. Dancsó and B. Volk, *Tetrahedron Lett.*, 2020, **61**, 151544.
15. P. Akbarzadeh and N. Koukabi, *Appl. Organomet. Chem.*, 2020, **34**, e5395.
16. A. Mariconda, M. Sirignano, C. Costabile and P. Longo, *Mol. Catal.*, 2020, **480**, 110570.
17. A. M. Munshi, M. Shi, S. P. Thomas, M. Saunders, M. A. Spackman, K. S. Iyer and N. M. Smith, *Dalton Trans.*, 2017, **46**, 5133-5137.

18. A. P. Shah, A. S. Sharma, S. Jain and N. G. Shimpi, *New J. Chem.*, 2018, **42**, 8724-8737.
19. M. Bakherad, F. Moosavi, R. Doosti, A. Keivanloo and M. Gholizadeh, *New J. Chem.*, 2018, **42**, 4559-4566.
20. S. Cheng, N. Shang, C. Feng, S. Gao, C. Wang and Z. Wang, *Catal. Commun.*, 2017, **89**, 91-95.
21. F. M. Moghaddam, S. E. Ayati, S. H. Hosseini and A. Pourjavadi, *RSC Adv.*, 2015, **5**, 34502-34510.
22. M. L. Kantam, V. Balasubrahmanyam, K. B. S. Kumar and G. T. Venkanna, *Tetrahedron Lett.*, 2007, **48**, 7332-7334.
23. S. S. Patil, S. V. Patil and V. D. Bobade, *Synlett*, 2011, **2011**, 1157-1159.
24. B. R. P. Reddy, P. V. G. Reddy, M. V. Shankar and B. N. Reddy, *Asian J. Org. Chem.*, 2017, **6**, 712-719.
